# Supplementary material for: Two FGFRL-Wnt circuits organize the planarian anteroposterior axis
Source: eLife journal article supplement (doi:10.7554/elife.12845), 2016-04-11
Supplement: supp [file elife-12845-supp-v1.zip]

Archive with 12 entries (12 files):
- elife_poa_e12845_Video_1.mp4
- elife_poa_e12845_Figure_2_figure_supplement_1.pdf
- elife_poa_e12845_Figure_3_figure_supplement_1.pdf
- elife_poa_e12845_Figure_5_figure_supplement_1.pdf
- elife_poa_e12845_Figure_1_figure_supplement_1.pdf
- elife_poa_e12845_Figure_2_figure_supplement_3.pdf
- elife_poa_e12845_Figure_4_figure_supplement_1.pdf
- elife_poa_e12845_Figure_1_figure_supplement_2.pdf
- elife_poa_e12845_Figure_2_figure_supplement_4.pdf
- elife_poa_e12845_Supplementary_File_1.xlsx
- elife_poa_e12845_Figure_2_figure_supplement_2.pdf
- elife_poa_e12845_Figure_6_figure_supplement_1.pdf
