# Supplementary material for: Two FGFRL-Wnt circuits organize the planarian anteroposterior axis
Source: eLife journal article supplement (doi:10.7554/elife.12845), 2016-04-11
Supplement: supp [file elife-12845-supp-v1.zip › elife_poa_e12845_Figure_2_figure_supplement_1.pdf]

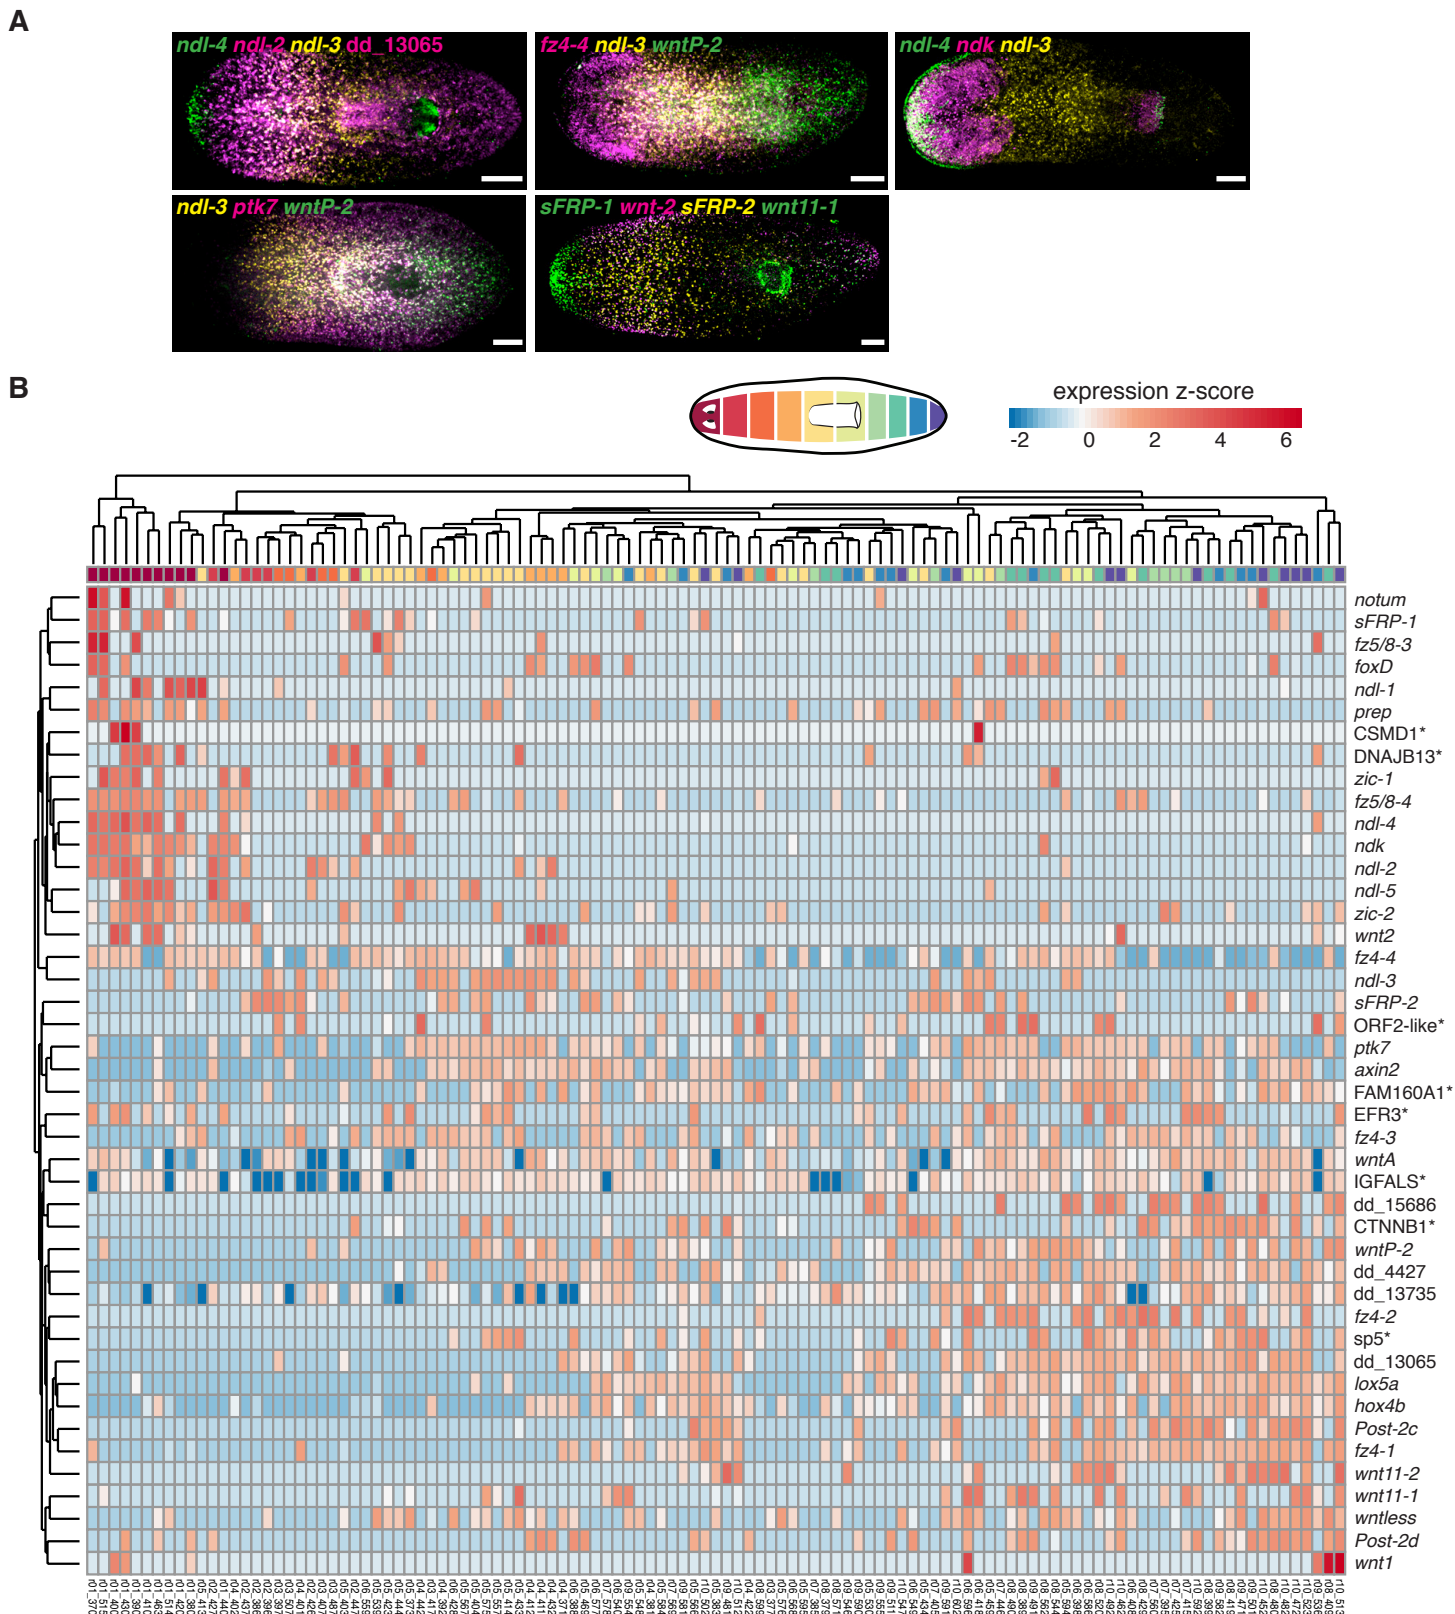

**Figure 2—figure supplement 1. Axial mRG map and co-expression of multiple *FGFR* genes and mRGs in the same muscle cell. (A)** FISH using a combination of known and new mRG RNA probes show distributions of gradients along the AP axis. Anterior, left. Scale bar, 100  $\mu$ m. Each image is representative of  $n > 5$  animals. **(B)** Heatmap shows hierarchical clustering of the identified 44 mRGs in each of the 115 muscle cells analyzed. Cartoon on top depicts the 10 regions dissected. Top color bar indicates region of origin for that cell. Expression values for each gene are scaled across each row as z-scores. (\*) marks transcripts that are best human BLASTx hits.
