# Supplementary material for: Two FGFRL-Wnt circuits organize the planarian anteroposterior axis
Source: eLife journal article supplement (doi:10.7554/elife.12845), 2016-04-11
Supplement: supp [file elife-12845-supp-v1.zip › elife_poa_e12845_Figure_2_figure_supplement_3.pdf]

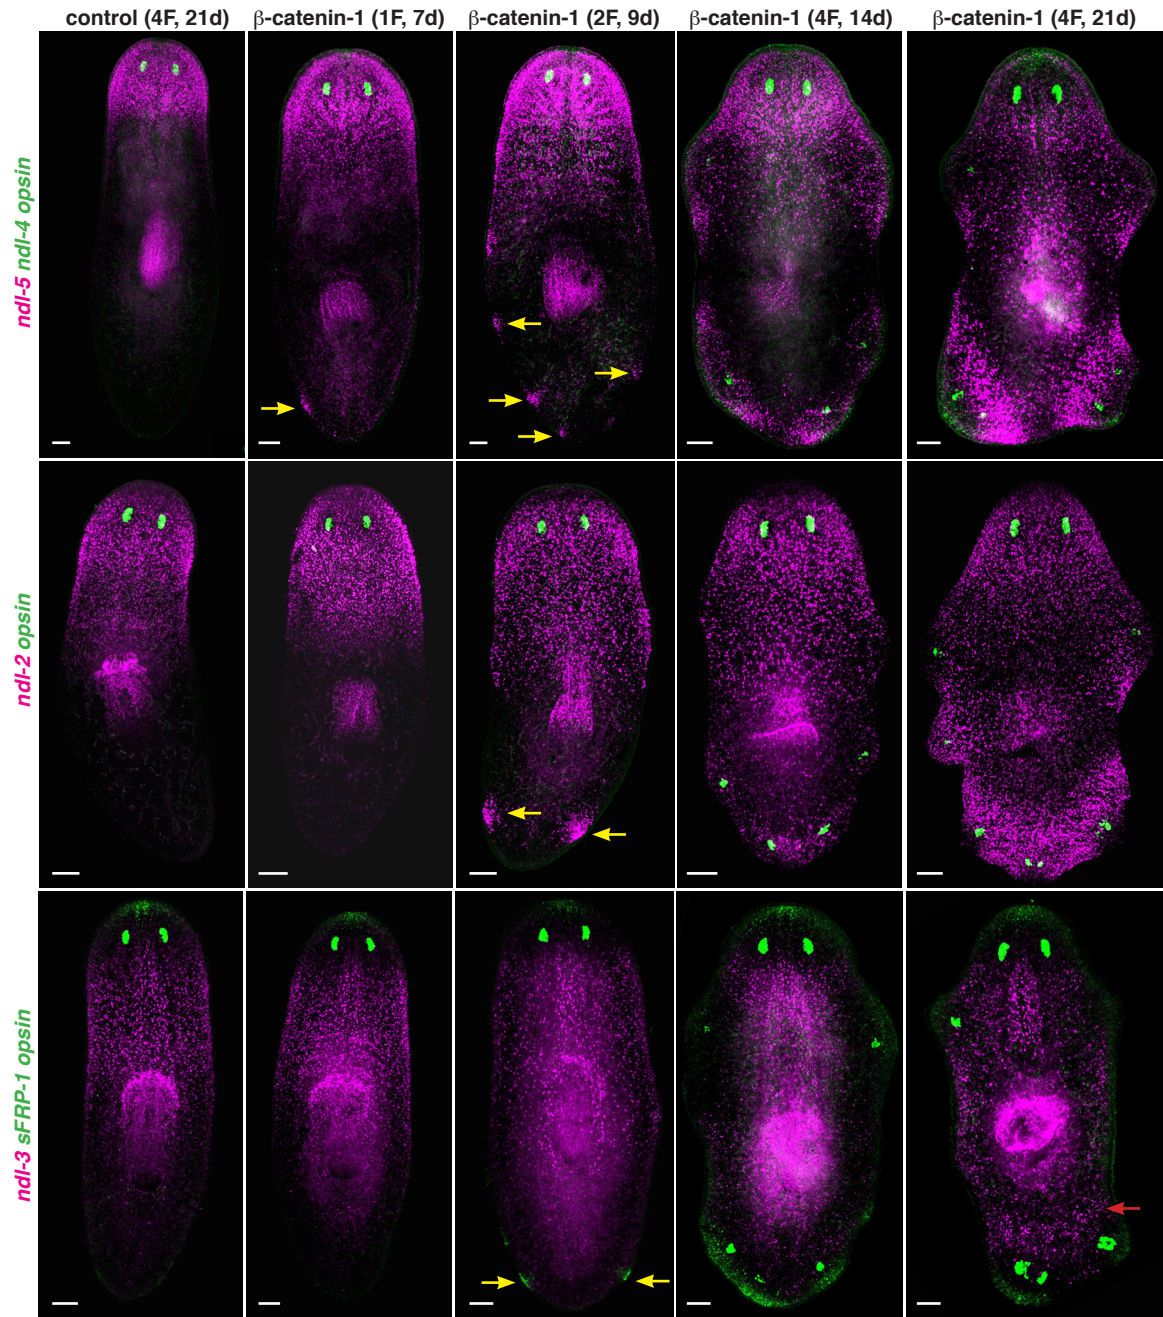

**Figure 2—figure supplement 3. Pattern of *FGFRL/ndl* family expression in  $\beta$ -*catenin-1* RNAi animals.** FISH shows expression of *ndl-5*, *ndl-2*, *ndl-3*, and *sFRP-1* in control and  $\beta$ -*catenin-1* RNAi animals after one, two or four RNAi feedings (1F, 2F, 4F). Animals were fixed at different timepoints after initiation of RNAi, shown in brackets at the top. Yellow arrows show ectopic expression of anterior mRGs in posterior regions of the animal before ectopic eyes are visible. Red arrow indicates ectopic expression of the prepharyngeal mRG *ndl-3*. *opsin* (green) marks eyes. Anterior, up. Scale bar, 100  $\mu$ m.
