# Supplementary material for: Two FGFRL-Wnt circuits organize the planarian anteroposterior axis
Source: eLife journal article supplement (doi:10.7554/elife.12845), 2016-04-11
Supplement: supp [file elife-12845-supp-v1.zip › elife_poa_e12845_Figure_2_figure_supplement_4.pdf]

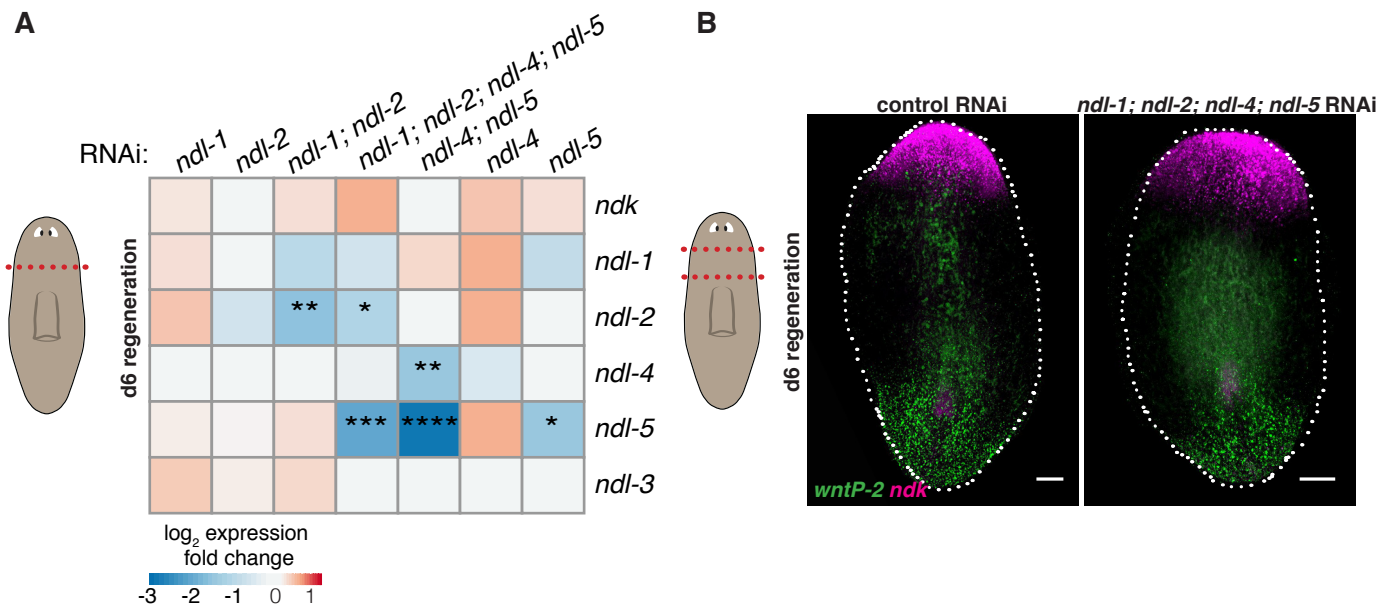

**Figure 2—figure supplement 4. Inhibition of *FGFRL* genes does not significantly change expression of other members of the *FGFRL* family. (A)** Heatmap shows efficiency of RNAi inhibition in each condition, and no significant effects in the expression level of other genes. Color scale represents mean  $\log_2$  fold change in expression of each gene (rows) in the RNAi conditions (columns) compared to control RNAi in 6 dpa head fragments (cartoon on left, screen RNAi feeding protocol was used, see Methods). At least three head fragments were analyzed by qRT-PCR in each condition. One-way ANOVA, \*  $p < 0.05$ , \*\*  $p < 0.01$ , \*\*\*  $p < 0.001$ , \*\*\*\*  $p < 0.0001$ . **(B)** FISH shows normal expression of *ndk* and *wntP-2* in *ndl-1; ndl-2; ndl-4; ndl-5* RNAi animals in prepharyngeal fragments 6 dpa (cartoon on left, same RNAi feeding protocol as A). Anterior, up. Scale bar, 100  $\mu\text{m}$ .
