# Supplementary material for: Two FGFRL-Wnt circuits organize the planarian anteroposterior axis
Source: eLife journal article supplement (doi:10.7554/elife.12845), 2016-04-11
Supplement: supp [file elife-12845-supp-v1.zip › elife_poa_e12845_Figure_3_figure_supplement_1.pdf]

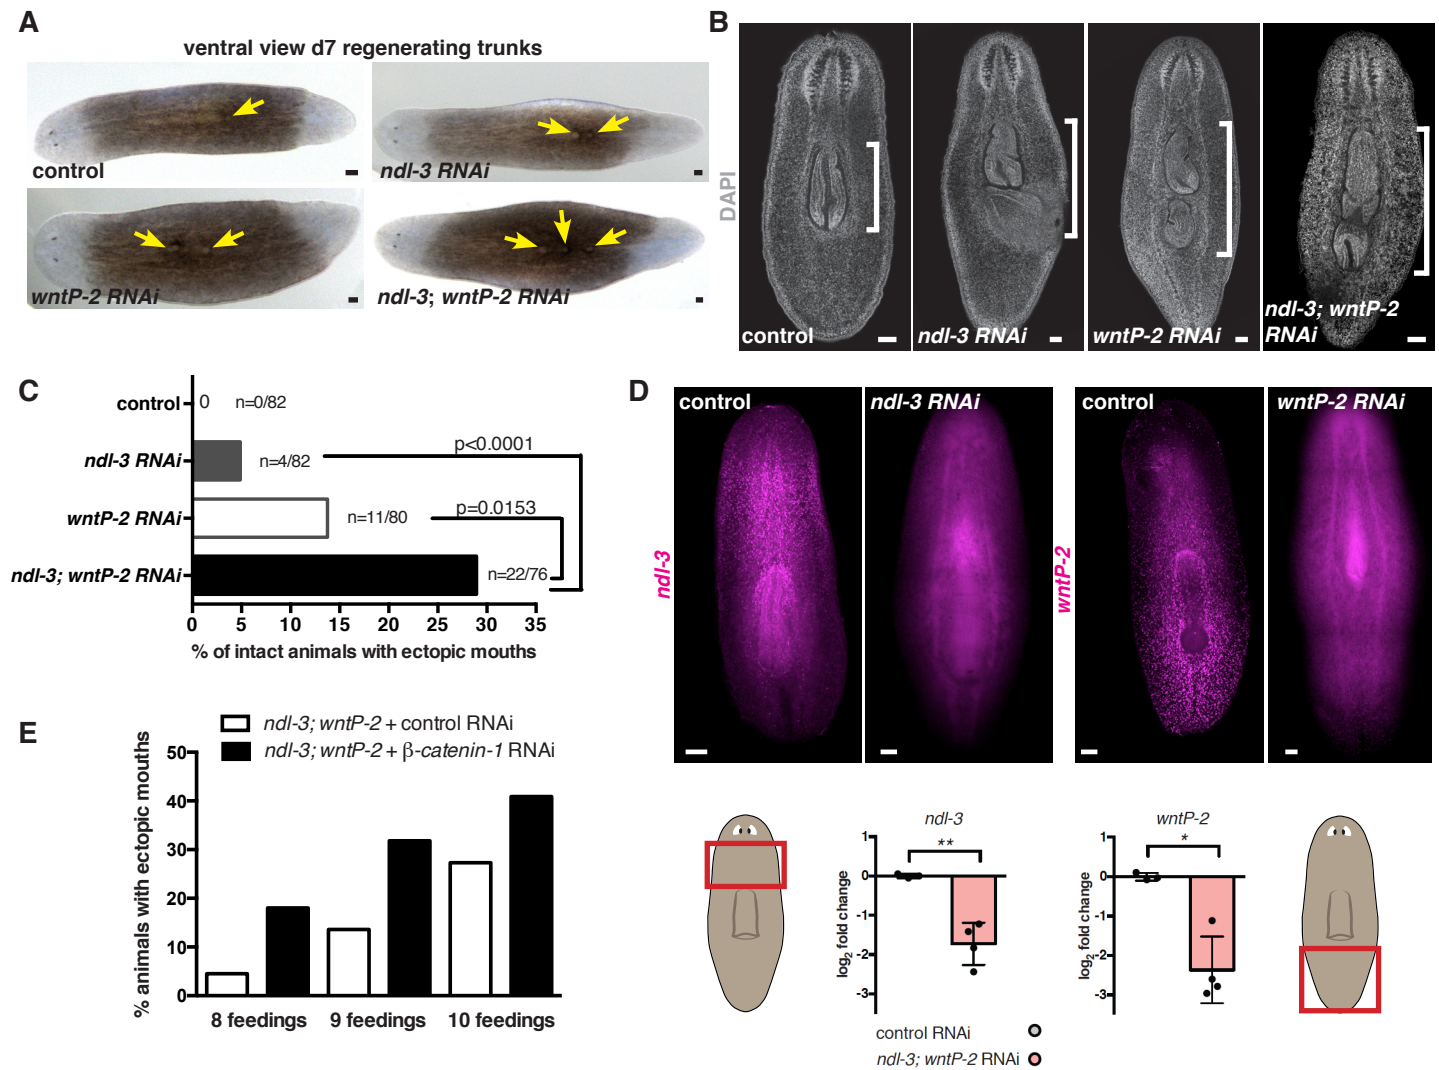

**Figure 3—figure supplement 1. *ndl-3* and *wntP-2* restrict the number of mouths and pharyngeal in the trunk region.** (A) Ectopic posterior mouths are observed in regenerating trunk pieces of *ndl-3*, *wntP-2*, and *ndl-3; wntP-2* RNAi animals 7 dpa. Number of animals showing ectopic mouths are described in Figure 3A. Yellow arrows point to mouths. Anterior, left; ventral, up. Scale bar, 100  $\mu$ m. (B) DAPI stainings of RNAi animals show pharyngeal in the different RNAi conditions. Bracket indicates pharyngeal cavity length. Anterior, up; Scale bar, 100  $\mu$ m. Images are representative of  $n > 10$  animals per condition. (C) Graph shows the percentage of intact RNAi animals with a total of two or more mouths after 8 RNAi feedings. p-values, Fisher's exact test. 3 independent RNAi experiments are pooled in this analysis. Number of animals with ectopic mouths out of total animals (n) are indicated. (D) FISH using RNA probes for *ndl-3* and *wntP-2* show a decrease in the expression of those genes following their RNAi demonstrating the efficiency of the inhibition (total of 8 RNAi feedings). Graphs below (mean  $\pm$  SD) show quantification of the mRNA levels by qRT-PCR. Student-t-test, \*  $p < 0.05$ , \*\*  $p < 0.01$ . Cartoons show the region from where the mRNA was extracted. (E) Graph shows the percentage of intact RNAi animals with a total of two or more mouths after different number of RNAi feedings. First five RNAi feedings were performed with only *ndl-3; wntP-2* dsRNA.  $\beta$ -catenin-1 or control dsRNA was added in addition to *ndl-3; wntP-2* starting on feeding six.
