# Supplementary material for: Two FGFRL-Wnt circuits organize the planarian anteroposterior axis
Source: eLife journal article supplement (doi:10.7554/elife.12845), 2016-04-11
Supplement: supp [file elife_poa_e12845_Figure_1_figure_supplement_2.pdf › elife_poa_e12845_Figure_1_figure_supplement_2.pdf]

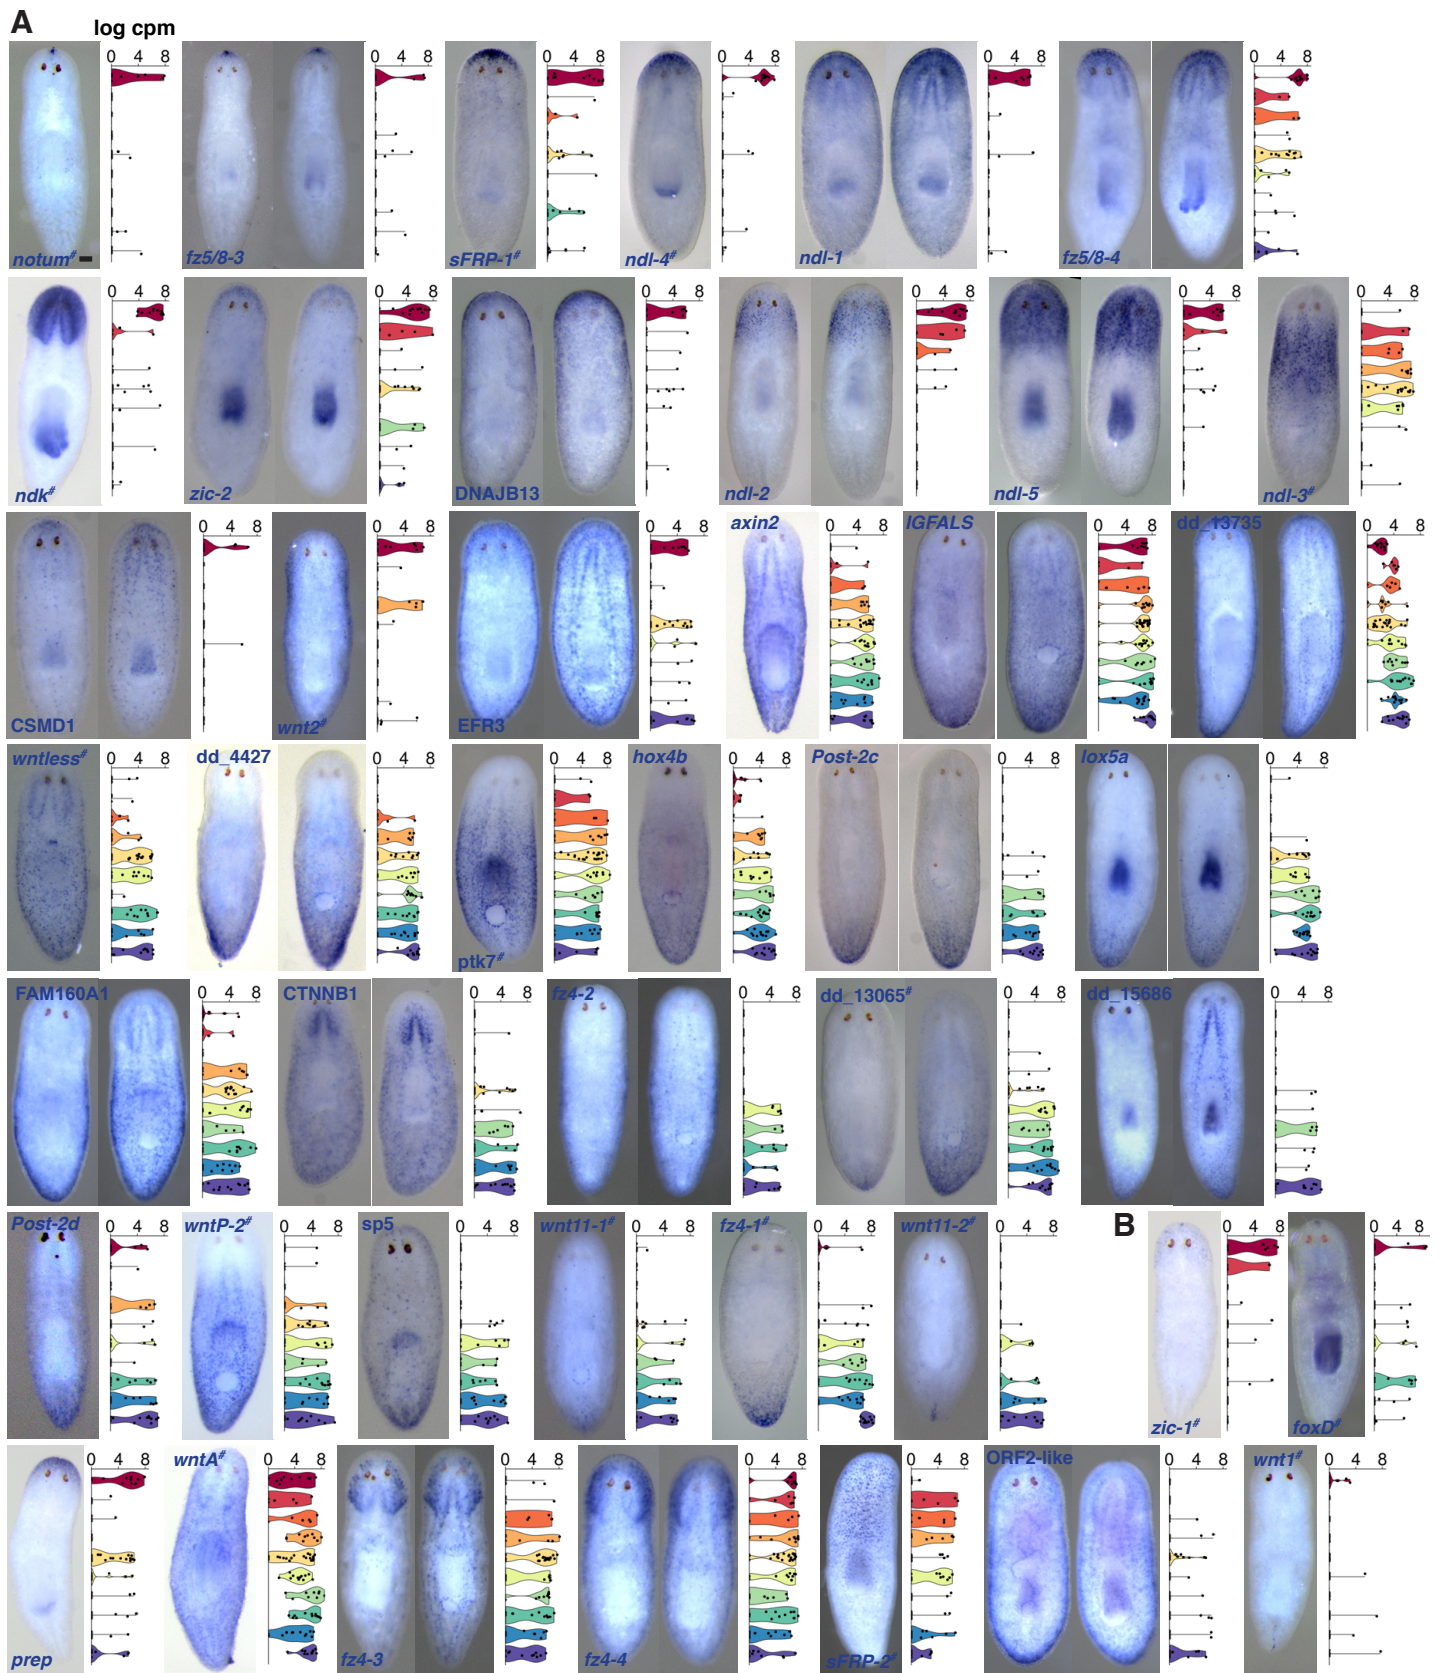

**Figure 1—figure supplement 2. 44 mRGs are distributed along the AP axis.** Colorimetric ISH of mRGs (blue) identified in SCDE analyses. Violin plots show the distribution of cells that express that gene in each of the 10 dissected regions; cpm, counts per million. #, previously known mRGs. (A) Genes with  $p < 0.005$  in any analysis; (B) Genes with  $p > 0.005$ . Anterior, up. Scale bar, 100  $\mu$ m. Each image is representative of  $n > 5$  animals. At least 2 independent ISH experiments were performed for each new mRG.
