# Supplementary material for: Two FGFRL-Wnt circuits organize the planarian anteroposterior axis
Source: eLife journal article supplement (doi:10.7554/elife.12845), 2016-04-11
Supplement: supp [file elife_poa_e12845_Supplementary_File_1.xlsx]

## Sheet: Supplementary File 1A
Supplementary File 1A. Single-cell library information
Region indicates AP region of origin; Muscle cell classification from PCA analysis on all 177 cells
Cell id	Reads mapped*	Unique transcripts	Region	Muscle cell
r01_370	155559	3374	1	muscle
r01_380	416600	4110	1	muscle
r01_390	127506	3364	1	muscle
r01_400	596424	3909	1	muscle
r01_410	214627	2674	1	muscle
r01_420	319727	4108	1	muscle
r01_430	513698	4127	1	muscle
r01_440	506419	4131	1	muscle
r01_463	78163	2594	1	muscle
r01_514	442476	4214	1	muscle
r01_515	265784	3260	1	muscle
r02_386	654671	1849	2	muscle
r02_396	606896	1635	2	muscle
r02_426	182839	2248	2	muscle
r02_427	102499	1543	2	muscle
r02_437	485369	2438	2	muscle
r02_447	488690	2523	2	muscle
r03_377	273089	2525	3	muscle
r03_397	411661	1656	3	muscle
r03_407	446672	2145	3	muscle
r03_417	425488	2808	3	muscle
r03_487	342157	2335	3	muscle
r03_507	162735	2264	3	muscle
r04_371	110609	2324	4	muscle
r04_381	111421	2331	4	muscle
r04_392	131713	2333	4	muscle
r04_401	279855	2108	4	muscle
r04_402	139936	2480	4	muscle
r04_411	140049	2661	4	muscle
r04_412	92301	2273	4	muscle
r04_422	235988	2346	4	muscle
r04_432	113071	2632	4	muscle
r04_442	259378	2635	4	muscle
r05_373	484846	4509	5	muscle
r05_383	648540	4063	5	muscle
r05_403	587092	4244	5	muscle
r05_404	423976	3807	5	muscle
r05_413	206754	3547	5	muscle
r05_414	253316	3416	5	muscle
r05_423	637262	4470	5	muscle
r05_433	724004	3711	5	muscle
r05_434	351711	3735	5	muscle
r05_444	316320	3876	5	muscle
r05_459	229407	3436	5	muscle
r05_469	60544	2088	5	muscle
r05_530	146142	2965	5	muscle
r05_539	561682	4503	5	muscle
r05_548	227555	3517	5	muscle
r05_557	1037925	4024	5	muscle
r05_566	432406	3322	5	muscle
r05_567	260423	3002	5	muscle
r05_575	468723	3724	5	muscle
r05_576	346166	2492	5	muscle
r05_584	169000	3203	5	muscle
r05_594	67320	2307	5	muscle
r05_595	211963	2920	5	muscle
r06_388	35746	2010	6	muscle
r06_398	35051	1721	6	muscle
r06_408	24899	1589	6	muscle
r06_418	157762	3827	6	muscle
r06_428	81130	2719	6	muscle
r06_540	649450	4162	6	muscle
r06_549	248718	3530	6	muscle
r06_559	885370	3707	6	muscle
r06_568	484518	3918	6	muscle
r06_577	587435	4204	6	muscle
r06_586	587036	3093	6	muscle
r06_596	503843	4293	6	muscle
r07_385	25898	1088	7	muscle
r07_395	69214	1967	7	muscle
r07_405	79638	2168	7	muscle
r07_415	59293	2269	7	muscle
r07_425	186122	2587	7	muscle
r07_446	134339	2413	7	muscle
r07_560	375122	3104	7	muscle
r07_569	154115	2586	7	muscle
r07_578	114085	2287	7	muscle
r08_379	19205	1250	8	muscle
r08_389	72521	2741	8	muscle
r08_399	193974	3673	8	muscle
r08_409	72630	2363	8	muscle
r08_419	427512	3883	8	muscle
r08_429	57057	1863	8	muscle
r08_480	468170	3912	8	muscle
r08_490	427119	3965	8	muscle
r08_520	178000	3487	8	muscle
r08_544	1004313	4441	8	muscle
r08_562	701514	3166	8	muscle
r08_571	172836	1527	8	muscle
r08_599	517351	2301	8	muscle
r09_471	234869	3056	9	muscle
r09_481	134898	2850	9	muscle
r09_491	60193	1969	9	muscle
r09_501	713256	3406	9	muscle
r09_511	68063	1188	9	muscle
r09_536	162415	2889	9	muscle
r09_546	134527	1149	9	muscle
r09_554	227160	2932	9	muscle
r09_555	140397	2401	9	muscle
r09_581	313118	2627	9	muscle
r09_582	121950	2241	9	muscle
r09_590	298368	2206	9	muscle
r09_591	231118	2956	9	muscle
r10_452	1146455	3822	10	muscle
r10_462	3884642	5966	10	muscle
r10_472	2343014	4248	10	muscle
r10_482	1608695	5109	10	muscle
r10_492	1330044	4350	10	muscle
r10_502	1644902	4696	10	muscle
r10_512	2114514	4078	10	muscle
r10_513	1103899	4158	10	muscle
r10_523	404780	3441	10	muscle
r10_547	197830	2523	10	muscle
r10_592	244078	2840	10	muscle
r10_602	470303	2389	10	muscle
r01_421	299867	4771	1	non-muscle
r01_431	411833	5008	1	non-muscle
r01_441	238195	4365	1	non-muscle
r01_453	286268	3584	1	non-muscle
r01_454	82186	2150	1	non-muscle
r01_464	576089	4802	1	non-muscle
r01_473	91681	3657	1	non-muscle
r01_474	904349	5379	1	non-muscle
r01_494	188011	4588	1	non-muscle
r01_504	215822	4544	1	non-muscle
r01_525	252828	4593	1	non-muscle
r03_387	332151	2668	3	non-muscle
r03_477	53607	1296	3	non-muscle
r03_497	117401	2209	3	non-muscle
r04_382	134083	2763	4	non-muscle
r04_391	74356	2146	4	non-muscle
r04_443	317953	2661	4	non-muscle
r05_374	354714	4948	5	non-muscle
r05_384	662157	5400	5	non-muscle
r05_393	501136	4555	5	non-muscle
r05_394	598309	4931	5	non-muscle
r05_424	259171	2987	5	non-muscle
r05_558	607241	3914	5	non-muscle
r06_378	113449	4444	6	non-muscle
r06_439	59972	1667	6	non-muscle
r06_449	92798	2623	6	non-muscle
r06_531	735830	6010	6	non-muscle
r06_532	1007089	5402	6	non-muscle
r06_541	477603	3329	6	non-muscle
r06_550	105688	1411	6	non-muscle
r06_587	285292	3734	6	non-muscle
r06_597	719474	5546	6	non-muscle
r07_375	108231	2474	7	non-muscle
r07_533	70842	2120	7	non-muscle
r07_542	113783	1477	7	non-muscle
r07_543	452872	3340	7	non-muscle
r07_551	71918	1777	7	non-muscle
r07_552	213410	3173	7	non-muscle
r07_561	341519	3138	7	non-muscle
r07_570	210188	2367	7	non-muscle
r07_579	259263	2918	7	non-muscle
r07_588	309445	4288	7	non-muscle
r07_598	99943	2515	7	non-muscle
r08_450	1131022	6468	8	non-muscle
r08_521	680843	6063	8	non-muscle
r08_534	1850257	7091	8	non-muscle
r08_535	513860	4324	8	non-muscle
r08_553	1607262	5393	8	non-muscle
r08_580	861020	4479	8	non-muscle
r08_600	1040912	4560	8	non-muscle
r09_451	168848	2528	9	non-muscle
r09_522	2702758	1799	9	non-muscle
r09_545	310238	3407	9	non-muscle
r09_573	363510	3531	9	non-muscle
r09_601	107220	2396	9	non-muscle
r10_483	742724	3875	10	non-muscle
r10_493	867310	5155	10	non-muscle
r10_503	1097692	3797	10	non-muscle
r10_538	96881	1772	10	non-muscle
r10_556	230540	3501	10	non-muscle
r10_583	333117	3488	10	non-muscle
r10_603	204542	2273	10	non-muscle
	*dd_Smed_v4 assembly. Does not include reads for dd_smedV4_0_0_1, dd_Smed_v4_7_0_1, and dd_Smed_v4_4_1_1

## Sheet: Supplementary File 1B
Supplementary File 1B. Top 12 significant genes defining principal components (PC) 1 and 2
PCA calculated on highly expressed, high variance genes and projected through entire dataset
PC1
PC score	Contig	Best BLASTx	Organism	id	E-val	Description
-12.6005	dd_Smed_v4_2197_0_1	COL4A6	Homo sapiens	NP_378667	6.68e-159	Collagen alpha-6(IV) chain
-12.1864	dd_Smed_v4_2337_0_1	COL4A6	Homo sapiens	NP_001274687	2.4e-148	Collagen alpha-6(IV) chain
-12.1273	dd_Smed_v4_810_0_1	FLNA	Homo sapiens	XP_011529432	0	filamin-A isoform X4 (PREDICTED)
-11.9797	dd_Smed_v4_2922_0_1	ARHGEF17	Homo sapiens	XP_011543707	2.1e-61	rho guanine nucleotide exchange factor 17 isoform X1 (PREDICTED)
-11.8844	dd_Smed_v4_402_0_1	COL24A1	Homo sapiens	AAP80185	3.42e-127	Collagen alpha-1(XXIV) chain
-11.8361	dd_Smed_v4_1579_0_1	COL4A6	Homo sapiens	BAA04809	8.68e-171	Collagen alpha-6(IV) chain
-11.8311	dd_Smed_v4_2736_0_1	smallhsp	Dugesia japonica	CBY89195	1.99e-07	Small HSP protein (Fragment)
-11.768	dd_Smed_v4_649_0_1	COL24A1	Homo sapiens	AAP80185	4.93e-123	Collagen alpha-1(XXIV) chain
-11.7511	dd_Smed_v4_832_0_1	COL1A2	Homo sapiens	CAA98969	1.19e-109	Collagen alpha-2(I) chain
-11.7455	dd_Smed_v4_450_0_1	CNN3	Homo sapiens	NP_001272984	1.3e-06	Calponin-3
-11.5984	dd_Smed_v4_2381_0_1	DjMHC-B	Dugesia japonica	BAA34955	1.97e-82	Myosin heavy chain (Fragment)
-11.5678	dd_Smed_v4_323_0_1	TNNI2	Homo sapiens	NP_003273	9.07e-16	Troponin I, fast skeletal muscle
10.3491	dd_Smed_v4_285_0_1	beta-actin	Dugesia japonica	AFX73037	5.45e-41	Beta-actin
9.72355	dd_Smed_v4_1122_0_1	SPTBN1	Homo sapiens	AAA60580	0	Spectrin beta chain, non-erythrocytic 1
9.66385	dd_Smed_v4_246_0_1	ACTG1	Homo sapiens	NP_001605	0	Actin, cytoplasmic 2 (Gamma-actin)
9.3834	dd_Smed_v4_929_0_1	VIL1	Homo sapiens	AAH17303	3.79e-61	Villin-1
9.35809	dd_Smed_v4_2946_0_1	ZFP-1	Schmidtea mediterranea	AFD29622	1.18e-35	Zinc finger protein
9.13367	dd_Smed_v4_1257_0_1	CD151	Homo sapiens	AAK14179	1.56e-27	CD151 antigen
9.00586	dd_Smed_v4_271_0_1	FABP7	Homo sapiens	CAG33338	2.02e-29	Fatty acid-binding protein, brain
8.89895	dd_Smed_v4_395_0_1	TAGLN3	Homo sapiens	NP_037391	4.54e-22	Transgelin-3 (Neuronal protein 22)
8.70514	dd_Smed_v4_63_0_1	COTL1	Homo sapiens	NP_066972	4.37e-37	Coactosin-like protein
8.48652	dd_Smed_v4_7033_0_1	ZFHX3	Homo sapiens	AAC14462	6.19e-24	Zinc finger homeobox protein 3
8.21879	dd_Smed_v4_5563_0_1	P53	Schmidtea mediterranea	ACN51391	0	SMED-P53
7.98283	dd_Smed_v4_2032_0_1	EPB41L2	Homo sapiens	AAH34718	5e-84	Band 4.1-like protein 2
PC2
PC score	Contig	Best BLASTx	Organism	id	E-val	Description
-10.5753	dd_Smed_v4_659_0_1	SMEDWI-1	Schmidtea mediterranea	Q2Q5Y9	0	Piwi-like protein 1 (SMEDWI-1)
-8.77965	dd_Smed_v4_1610_0_1	beta-actin	Dugesia japonica	AFX73037	1.24e-15	Beta-actin
-7.95465	dd_Smed_v4_1206_0_1	GST-1	Schmidtea mediterranea	AFJ24753	5.7e-32	Glutathione S transferase-1
-7.813	dd_Smed_v4_921_0_1	XIRP2	Homo sapiens	NP_001073278	1.4e-18	xin actin-binding repeat-containing protein 2 isoform 2
-7.30204	dd_Smed_v4_4878_0_1	JUNLI-1	Schmidtea mediterranea	AFD29623	0	c-jun-like
-7.15158	dd_Smed_v4_2592_0_1	BRULI	Schmidtea mediterranea	ABC70476	0	Bruno-like
-6.9328	dd_Smed_v4_2875_0_1	CBFB	Homo sapiens	NP_001746	1.9e-19	core-binding factor subunit beta isoform 2
-6.63556	dd_Smed_v4_1566_0_1	PC-2	Schmidtea mediterranea	DAA33932	0	Prohormone convertase 2
-6.60433	dd_Smed_v4_1095_0_1	HMB-1	Schmidtea mediterranea	AFJ24846	3.87e-48	High mobility group-1
-6.6041	dd_Smed_v4_294_0_1	KHD-1	Schmidtea mediterranea	AFD29610	0	KH-domain protein
-6.57157	dd_Smed_v4_1999_0_1	RKHD1	Homo sapiens	EAW69483	6.28e-16	ring finger and KH domain containing 1, partial
-6.46209	dd_Smed_v4_2649_0_1	FBN2	Homo sapiens	AAA18950	4.47e-147	Fibrillin-2
5.92129	dd_Smed_v4_5325_0_1	DMD	Homo sapiens	AAH70078	2.46e-80	Dystrophin
5.70907	dd_Smed_v4_11486_0_1	SLC16A-5	Schmidtea mediterranea	AKN21500	1.03e-71	solute carrier 16A-5, partial
5.64409	dd_Smed_v4_702_0_1	COL24A1	Homo sapiens	AAP80185	5.13e-106	Collagen alpha-1(XXIV) chain
5.59837	dd_Smed_v4_4392_0_1	TRAF-2B	Dugesia japonica	ADF47430	2.31e-71	TNF receptor-associated factor-2-like protein B
5.54495	dd_Smed_v4_12410_0_1	LRRC75A	Homo sapiens	XP_011522147	3	leucine-rich repeat-containing protein 75A isoform X1 (PREDICTED)
5.5318	dd_Smed_v4_1511_0_1	PKM2	Homo sapiens	NP_872270	1.34e-164	Pyruvate kinase
5.44805	dd_Smed_v4_309_0_1	SLC2A-5	Schmidtea mediterranea	AKN21399	0.17	solute carrier 2A-5, partial
5.42085	dd_Smed_v4_762_0_1	GLIPR2	Homo sapiens	NP_071738	5.63e-27	Golgi-associated plant pathogenesis-related protein 1
5.40215	dd_Smed_v4_1399_0_1	NA	Schmidtea mediterranea	AFJ24761	3.52e-39	Uncharacterized protein
5.40062	dd_Smed_v4_3985_0_1	INX4	Dugesia japonica	BAE78813	0	Innexin
5.39892	dd_Smed_v4_14711_0_1	EGR-3	Schmidtea mediterranea	AFJ24724	1.92e-93	Early growth response-3
5.34308	dd_Smed_v4_5252_0_1	DMD	Homo sapiens	AAH70078	1.06e-79	Dystrophin

## Sheet: Supplementary File 1C
Supplementary File 1C. Anterior (regions 1-3) versus Posterior (regions 8-10) SCDE analysis and ISH results
All genes with p<0.005 (|Z|>2.58) in this SCDE analysis are shown above double line, with non-significant genes screened by ISH listed below double line.
* indicates name is human best BLASTx hit; SCDE log2 expression ratio calculated as maximum likelihood estimate (lower bound, upper bound); cZ is Z score corrected for multiple hypothesis using Holm procedure
Anterior
		SCDE				Human best BLASTx			PFAM
Name	Contig	Log2 expression ratio	Z-score	cZ	ISH pattern	Description	id	E-val	Description	id	E-val	Notes	5' outer primer	5' inner primer	3' primer
Smed-ndl-2	dd_Smed_v4_8340_0_1	8.04 (5.08 , 9.65)	5.69118	3.83448	AP gradient	fibroblast growth factor receptor 3 (FGFR3)	uc003gdq.3	5e-09,	I-set, Ig_3, Ig_2, V-set, ig,	PF07679.11, PF13927.1, PF13895.1, PF07686.12, PF00047.20,	4.1e-17, 2.7e-14, 4.1e-14, 1.8e-12, 3.8e-09,		GATGCAGTCTGACCCGCA	TGCAACAGGAAGGAAAGTTACTG	ACCCTGTTGAACCAAGCCA
Smed-ndl-4	dd_Smed_v4_12674_0_1	6.73 (4.06 , 9.03)	5.13142	3.32012	AP gradient	fibroblast growth factor receptor-like 1 (FGFRL1)	uc010ibo.3	8e-22,	I-set, Ig_2, ig, V-set, Ig_3, Receptor_2B4,	PF07679.11, PF13895.1, PF00047.20, PF07686.12, PF13927.1, PF11465.3,	1e-27, 2e-17, 9.2e-14, 4.3e-11, 3e-08, 7e-06,	Rink, 2009	NA	NA	NA
Smed-zic-2	dd_Smed_v4_15531_0_1	4.83 (2.45 , 7.31)	4.21122	1.85168	AP gradient	Zic family member 2 (ZIC2)	uc001von.3	5e-79,	zf-H2C2_2, zf-C2H2, zf-C2H2_4,	PF13465.1, PF00096.21, PF13894.1,	4e-17, 9.3e-13, 7.5e-08,		TAAGCTCGGCCGCGAATT	GAGCGAATCCGATTTGTGTGG	TTGCGCAAAGAGCTGGGA
Smed-fz5/8-4	dd_Smed_v4_11823_0_1	4.35 (2.23 , 7.46)	4.20017	1.85168	AP gradient, CNS	frizzled family receptor 5 (FZD5)	uc021vvr.1	0,	Frizzled, Fz,	PF01534.12, PF01392.17,	3.4e-123, 6e-32,		GATGCGCTCCCGTCATGA	TGGCCGAAAAGTATGGATTGTG	TGCTGAACGTTGCCAGCA
Smed-ndl-5	dd_Smed_v4_5102_0_1	6.00 (3.00 , 7.71)	4.14472	1.85168	AP gradient, CNS	NA	NA	NA	I-set, V-set,	PF07679.11, PF07686.12,	4.9e-07, 2.2e-05,		GGTCAGCCAAAGTCCCCC	ACAGTATTTCTTAACACGGGTCA	TGAACCATACGGAGCGGT
Smed-ndk	dd_Smed_v4_11285_0_1	4.61 (2.34 , 8.74)	4.04599	1.7072	AP gradient, CNS	fibroblast growth factor receptor-like 1 (FGFRL1)	uc010ibo.3	4e-15,	I-set, Ig_2, Ig_3, V-set, ig,	PF07679.11, PF13895.1, PF13927.1, PF07686.12, PF00047.20,	1.4e-19, 6.8e-15, 2.1e-11, 1.1e-08, 4.2e-07,	Rink, 2009	NA	NA	NA
DNAJB13*	dd_Smed_v4_4820_0_1	5.08 (2.27 , 7.20)	3.58792	0.744951	AP gradient	DnaJ (Hsp40) homolog, subfamily B, member 13 (DNAJB13)	uc001ouo.3	9e-133,	DnaJ_C, DnaJ,	PF01556.13, PF00226.26,	3.2e-24, 1e-21,		ACTCTGCATTCAAAGAAATGCA	TGCACTGAAGCTCCATCCA	TCATTGTTATCGTAGAATGGCCT
Smed-ndl-1	dd_Smed_v4_8310_0_1	4.31 (1.68 , 7.06)	3.26463	1.59036e-05	AP gradient, CNS	fibroblast growth factor receptor-like 1 (FGFRL1)	uc010ibo.3	7e-08,	I-set,	PF07679.11,	2.3e-07,		CCCCCGGCCATATTTCCG	TGAACAAGGAACATACAGGTCA	TGACCTGGAAAATAGGCGGT
ROCK2*	dd_Smed_v4_11429_0_1	5.34 (2.08 , 7.24)	2.99104	1.59036e-05	epidermis	Rho-associated, coiled-coil containing protein kinase 2 (ROCK2)	uc002rbd.1	7e-112,	Pkinase, Pkinase_Tyr,	PF00069.20, PF07714.12,	3.4e-59, 2.9e-31,		CGGCCAAGGAGCATTTGG	CAAACTGGAGATTTGTTTGCGT	TCCAGTTGGACACAGCGC
PCDH1*	dd_Smed_v4_17019_0_1	5.67 (2.34 , 7.46)	2.92196	1.59036e-05	no PCR	protocadherin 1 (PCDH1)	uc011dbf.2	3e-73,	Cadherin, Cadherin_2,	PF00028.12, PF08266.7,	1e-81, 6.1e-12,		AGCACTTAGATCGGGAGCTC	CAATCCGAATACTGGGACGC	TCATTTGCTCGGATTTGGGC
Smed-sFRP-1	dd_Smed_v4_13985_0_1	4.31 (1.75 , 7.02)	2.88517	1.59036e-05	AP gradient	secreted frizzled-related protein 5 (SFRP5)	uc001kor.4	2e-37,	Fz,	PF01392.17,	1.9e-29,	Petersen, 2008	NA	NA	NA
XPO5*	dd_Smed_v4_12042_0_1	5.41 (2.08 , 7.49)	2.8232	1.59036e-05	unclear pattern	exportin 5 (XPO5)	uc003ovp.3	3e-24,	Xpo1,	PF08389.7,	1.9e-07,		GACTTTGTCTTCCAGGGCGA	GCGAACCATTAGAGATCCAAGC	ACGCTCTGTGGCCATTCC
PPP1R37*	dd_Smed_v4_5089_0_1	4.28 (1.24 , 6.58)	2.80758	1.59036e-05	gut	protein phosphatase 1, regulatory subunit 37 (PPP1R37)	uc021uvs.1	2e-105,	LRR_6,	PF13516.1,	4.7e-11,		ACCAAGTGTTCCAAATGAGAGA	ACCACCTGAAACAAACACTTTTG	TCTGCATAGGGATCATTTGGCA
dd_42033	dd_Smed_v4_42033_0_1	2.56 (0.69 , 4.42)	2.75936	1.59036e-05	no signal	NA	NA	NA	NA	NA	NA		GCGAGAAACCCCCTCACC	AGGTTTCCTCAGCCATGCT	GGGTTGCTTCACTTCGGC
CSMD1*	dd_Smed_v4_13071_0_1	5.01 (1.43 , 6.91)	2.69393	1.59036e-05	AP gradient, CNS, midline	CUB and Sushi multiple domains 1 (CSMD1)	uc011kwj.2	3e-27,	Sushi,	PF00084.15,	1.4e-39,		AGCCGGTCAATGGACACG	GTCGGTGACCAAGTCGAGT	ACGGCAATCTTCGGACCC
AGO1*	dd_Smed_v4_2478_0_1	3.14 (0.80 , 5.34)	2.63403	1.59036e-05	unclear pattern	argonaute RISC catalytic component 1 (AGO1)	uc001bzl.3	2e-22,	PAZ,	PF02170.17,	2.4e-17,		CAGCGACCACCTGCTGAA	ACATTTCAGTCTCAACCACAGGA	CGGCTGGTATGGCAGCAA
ACAT1*	dd_Smed_v4_3883_0_1	4.28 (1.10 , 6.29)	2.62646	1.59036e-05	epidermis	acetyl-CoA acetyltransferase 1 (ACAT1)	uc001pjy.3	5e-125,	Thiolase_N, Thiolase_C,	PF00108.18, PF02803.13,	5.3e-83, 5e-37,		TCTTCCTCGAAGTAGTTGACCT	GGATGTCGAACTCCAATCGGT	CCTCCACCACCGTTGCAA
dd_11446	dd_Smed_v4_11446_0_1	2.89 (0.69 , 5.19)	2.61776	1.59036e-05	dotty	NA	NA	NA	NA	NA	NA		CGGGTCGTATGGTCAAGTTG	CATTCCAGCCAGTATCCGAAC	TTGCGTCTTCTTCACAGCAC
dd_17790	dd_Smed_v4_17790_0_2	4.31 (1.06 , 6.36)	2.60182	1.59036e-05	unclear pattern	NA	NA	NA	NA	NA	NA		AGTGTGGCAGCGCAAAAA	TCGAGGTGTGCCAGAATTTCT	TGTAGGCATAATTGTTTTCCGGA
LOC653653*	dd_Smed_v4_9393_0_1	4.35 (1.10 , 6.29)	2.59903	1.59036e-05	unclear pattern	adaptor-related protein complex 1, sigma 2 subunit pseudogene (LOC653653)	uc010wot.1	1e-79,	Clat_adaptor_s,	PF01217.15,	1.7e-58,		CGACAAGGTAAACTTCGACTGC	AAAATCGCTAGGGACTTAATTGC	AGTTCTGGTGGTAACGACTGT
dd_11924	dd_Smed_v4_11924_0_1	4.24 (1.02 , 6.29)	2.5951	1.59036e-05	CNS	NA	NA	NA	NA	NA	NA		TGTCCGGGCAGTTTCTTACT	ACCTTTTGCAAAAACTCGATCT	TGTCATCATCAGGTAGCATCAGG
dd_7323	dd_Smed_v4_7323_0_1	2.82 (0.66 , 5.37)	2.59131	1.59036e-05	no PCR	NA	uc001tye.1	9e-72,	RRM_1, RRM_6, RRM_5,	PF00076.17, PF14259.1, PF13893.1,	9.1e-37, 2.5e-32, 3.8e-10,		CAGCCGCATAATAAACGCGT	TCTCTCTGGTTTTTGTCAGTTGA	GTGTACACATGGGCTCGGT
Smed-fz5/8-3	dd_Smed_v4_16571_0_1	4.68 (1.32 , 7.28)	2.58492	1.59036e-05	AP gradient	frizzled family receptor 5 (FZD5)	uc021vvr.1	0,	Frizzled, Fz,	PF01534.12, PF01392.17,	2.2e-119, 3.9e-33,		GCAGCTGCAGGAAACCTT	TGTTTAATTGTGCTCAGGGCTG	AAGGCGGAGGAGTGGACT
RAB11FIP3*	dd_Smed_v4_11969_0_1	3.55 (0.88 , 6.32)	2.53419	1.59036e-05	no signal	RAB11 family interacting protein 3 (class II) (RAB11FIP3)	uc010uug.2	1e-15,	RBD-FIP,	PF09457.5,	7.9e-12,		ACAATGATGACGATGACGACGA	CACTGATCTCCAAAATGAAACCA	TTTTCGAGGCGCCGACTT
KCNT1*	dd_Smed_v4_9739_0_1	3.91 (0.84 , 6.65)	2.5018	1.59036e-05	CNS	potassium channel, subfamily T, member 1 (KCNT1)	uc011mdq.2	0,	BK_channel_a, Ion_trans_2,	PF03493.13, PF07885.11,	2.6e-33, 5.9e-14,		TGGTTCCCGGTCCGACTA	CCCGATTGTCACCGGTTCA	TGGCATTTGTCGGCAGCT
dd_13200	dd_Smed_v4_13200_0_1	4.09 (0.80 , 6.40)	2.42927	1.59036e-05	unclear pattern	NA	NA	NA	NA	NA	NA		TGCTTGCTGGATTGCGGA	TTTCAGAACCAAAAAGCTGGCA	GCTGGACACTGGGCTGTT
RASSF5*	dd_Smed_v4_9008_0_1	2.49 (0.44 , 4.53)	2.39739	1.59036e-05	CNS	Ras association (RalGDS/AF-6) domain family member 5 (RASSF5)	uc001hef.3	9e-13,	RA,	PF00788.18,	1.6e-05,		GCATGAGTCATGAATGCCTCAC	GTGCAGGCCGAATTAATGCA	TATCCTTTTCGAAGCGAACCA
dd_14289	dd_Smed_v4_14289_0_1	3.00 (0.51 , 5.48)	2.32788	1.59036e-05	no signal	NA	NA	NA,	NA	NA	NA		GCCAATGGCGATTTATTCTTAGT	AAGCGACATAATACACGATGGA	TGAAGCATGCTTTGAAATACACT
GDAP2*	dd_Smed_v4_8031_0_1	4.61 (0.77 , 6.80)	2.32493	1.59036e-05	no signal	ganglioside induced differentiation associated protein 2 (GDAP2)	uc001ehg.3	3e-75,	CRAL_TRIO_2, Macro,	PF13716.1, PF01661.16,	1.9e-16, 1.5e-12,		CCCGTATTCAAATTTTCACCTGA	TGGATTTTGGTCTGGAAACATTT	TGACGACATCGACTGCCG
CBX3*	dd_Smed_v4_8960_0_1	3.03 (0.44 , 5.52)	2.27782	1.59036e-05	epidermis	chromobox homolog 3 (CBX3)	uc003sxu.3	4e-34,	Chromo, Chromo_shadow,	PF00385.19, PF01393.14,	3.5e-18, 4.9e-16,		GCCGGTGGCCATGAAAAC	CGACGGTCGTGAATCGGA	TGGAGTTGCTCTGCTGTGG
AGBL5*	dd_Smed_v4_13116_0_1	4.13 (0.62 , 6.84)	2.22798	1.59036e-05	unclear pattern	ATP/GTP binding protein-like 5 (AGBL5)	uc002rid.3	6e-119,	Peptidase_M14,	PF00246.19,	3.3e-20,		TGGCGTGTATCATGGGCA	CCGAACTGATACAAGGGGTGT	CCAACGCTGATACGGCCA
dd_16752	dd_Smed_v4_16752_0_1	4.13 (0.51 , 6.43)	2.21496	1.59036e-05	no signal	NA	uc011cqt.2	2e-68,	7tm_1, 7TM_GPCR_Srsx,	PF00001.16, PF10320.4,	2.2e-77, 4.4e-06,		TGTAGGAACTGCGGGAGGA	ACTAGTGATCATGTCAGTGGCT	ATGCCGGTCCAAAGTCGT
ASIC2*	dd_Smed_v4_14044_0_1	4.13 (0.58 , 6.43)	2.20501	1.59036e-05	no signal	acid-sensing (proton-gated) ion channel 2 (ASIC2)MDEG1	uc002hhu.3	7e-07,	ASC,	PF00858.19,	3.5e-42,		GCAGTGCAGCTTCCAGGA	TGAGGCATTTGTTTGCTTACGG	ACCGGCATTCCAGCATCC
ITK*	dd_Smed_v4_6672_1_1	3.03 (0.22 , 5.78)	2.09756	1.59036e-05	unclear pattern	IL2-inducible T-cell kinase (ITK)	uc003lwo.1	5e-19,	Pkinase, Pkinase_Tyr,	PF00069.20, PF07714.12,	3.9e-36, 1.6e-33,		ACCCCTCCAATTACAGGCTC	AGGACGCAAATGGAAAACGA	ACGGCAGCAAATGACCAGA
ACOX3*	dd_Smed_v4_3804_0_1	2.19 (0.11 , 4.24)	2.06061	1.59036e-05	unclear pattern	acyl-CoA oxidase 3, pristanoyl (ACOX3)	uc003glc.4	0,	ACOX, Acyl-CoA_dh_M, Acyl-CoA_dh_1,	PF01756.14, PF02770.14, PF00441.19,	4.6e-48, 3.5e-12, 2e-08,		TGGAAGCAACGCTAAAGCT	ACAACGGCAACTTTTGATCCA	CGGAAACTCCCAAAGGCG
dd_9906	dd_Smed_v4_9906_0_1	5.01 (0.18 , 7.17)	2.02366	1.59036e-05	unclear pattern	NA	NA	NA	HLH,	PF00010.21,	1.5e-13,		TGGCATAGTCATGGTAACCGT	AGGAAACTCATTGCCTACTTCCA	CCCGACAATTAACCAAAGATCCG
SMAD3*	dd_Smed_v4_8193_0_2	3.07 (0.07 , 5.67)	2.01101	1.59036e-05	epidermis	SMAD family member 3 (SMAD3)	uc010ujt.2	5e-80,	MH2,	PF03166.9,	7.3e-61,		TGAAGAAAATCATGTAAGCGGGG	TTTCTCGATCGATTCAGCCA	AACACTGATTTGATGGAGTTTCC
dd_5445	dd_Smed_v4_5445_0_1	2.63 (0.04 , 5.81)	1.99037	1.59036e-05	gut	NA	NA	NA	OSTMP1,	PF09777.4,	1.3e-17,		TGTTTAATTGTAAATGCGGGACC	AGAATTCGATAAAATTTGGGCGG	TGAGAAAAATGCTGCTTCAACGA
LRRC24*	dd_Smed_v4_14579_0_1	2.67 (-0.04 , 5.52)	1.9416	1.59036e-05	CNS	leucine rich repeat containing 24 (LRRC24)	uc003zdm.3	6e-16,	NA	NA	NA		ACTGCGTAGAACCTCGCG	GGGTGTCCGTCATATTGCCA	TGGCTCATCACTAGAGGCA
dd_15058	dd_Smed_v4_15058_0_1	3.00 (-0.22 , 6.14)	1.87335	1.59036e-05	epidermis	NA	NA	NA	NA	NA	NA		GTTGCTCAGGAATATTCATCCGA	TAGTTTATGAATGGGAGAGGCCT	AGCTGATAAGTGAGAGAGAAACA
dd_19017	dd_Smed_v4_19017_0_1	3.66 (-0.37 , 5.85)	1.78075	1.59036e-05	unclear pattern	NA	NA	NA	7tm_1, 7TM_GPCR_Srw,	PF00001.16, PF10324.4,	9.1e-10, 4.6e-08,		TTTTTATTGCGGTTGTTGCGA	TCGTCACGAATACTTTGACAGT	AATGATTAAACCTTGTGTCGCCT
dd_6261	dd_Smed_v4_6261_0_1	2.78 (-0.80 , 5.52)	1.6452	1.59036e-05	unclear pattern	NA	NA	NA	DUF296,	PF03479.10,	3.2e-23,		ACATCAACACGGCTGGCA	GGCACAAAATCATCGGAAAATGG	AGGCGGCGCTGATTTTCT
BNC1*	dd_Smed_v4_18947_0_1	1.83 (-1.06 , 4.46)	1.39947	1.59036e-05	epidermis	basonuclin 1 (BNC1)	uc002bjt.1	5e-30,	NA	NA	NA		TTGAGCCAGCTTTGCGTT	TGGCCATTTCATGTTCTTCATCG	TGGCGGTTCCTTGATGTTGT
dd_12845	dd_Smed_v4_12845_0_1	2.60 (-2.01 , 5.63)	1.29476	1.59036e-05	unclear pattern	NA	NA	NA	KN_motif,	PF12075.3,	0.00059,		TCCAGTTCCGATAGCAACTCG	ACCCAAATCGACATGAGGGA	GGATCGGCTGTTGCGACT
dd_29868	dd_Smed_v4_29868_0_1	1.54 (-1.17 , 4.72)	1.13783	1.59036e-05	unclear pattern	NA	NA	NA	NA	NA	NA		AAGCGTTGGAACCACCGA	ACCAACTAACCTGAAACGAACG	CTTTCTCTAGATCTCCATTGGGT
GOLGA5*	dd_Smed_v4_5164_0_1	1.32 (-1.02 , 3.47)	1.13063	1.59036e-05	large cells	golgin A5 (GOLGA5)	uc001yaz.1	2e-54,	Golgin_A5,	PF09787.4,	7.2e-30,		GCCTCGAAGTGGATCTGACA	TCGGATAACTGTTCCAGTGGA	CGAGCAGGTGGATAGCGT
dd_783	dd_Smed_v4_783_0_1	1.46 (-1.24 , 3.91)	1.07878	1.59036e-05	unclear pattern	NA	NA	NA	ubiquitin, Rad60-SLD,	PF00240.18, PF11976.3,	2.1e-12, 5.8e-08,		ACGGAAGTGCGTCGAGAA	ACGAAGACAATGTCAACCGT	TCCACCTCTGGTTCTCATCA
DHPS*	dd_Smed_v4_12987_0_1	1.39 (-1.39 , 4.39)	1.07101	1.59036e-05	unclear pattern	deoxyhypusine synthase (DHPS)	uc002muh.2	2e-150,	DS,	PF01916.12,	6.8e-123,		CAAGATTGTGCTCTTGTGGCT	TGACAGTTTGCCTGAAGGTGT	ACATTATACGCTCAGTTCCACT
ACSS1*	dd_Smed_v4_6561_0_1	0.77 (-1.61 , 3.33)	0.652432	1.59036e-05	unclear pattern	acyl-CoA synthetase short-chain family member 1 (ACSS1)	uc002wub.3	0,	AMP-binding, DUF3448, DUF4009,	PF00501.23, PF11930.3, PF13193.1,	1.2e-87, 3.7e-22, 5.1e-15,		ACCCCGAACGACTTGCTG	TGGGAAAAGGATGAGCCAGG	GAACCCCACAACTGCCGA
DENND1C*	dd_Smed_v4_7163_0_1	1.06 (-2.85 , 3.77)	0.612974	1.59036e-05	CNS, epidermis	DENN/MADD domain containing 1C (DENND1C)	uc010xje.2	3e-22,	DENN, dDENN,	PF02141.16, PF03455.14,	4.3e-26, 2.9e-06,		TCCCGAACCAGGACTCGT	ACATTCCTGCTGCCAATTTCA	TGCAGCAACCAAACCAACAG
CELF5*	dd_Smed_v4_14010_0_1	0.00 (-2.23 , 3.69)	0.402003	1.59036e-05	CNS	CUGBP, Elav-like family member 5 (CELF5)	uc002lxl.2	4e-95,	RRM_1, RRM_6, RRM_5,	PF00076.17, PF14259.1, PF13893.1,	2.8e-34, 8.1e-22, 2.1e-15,		GTTGCCGTTTCTGCTGCC	TCTCTAATCGTCGGTGATTCTCG	GCCTGGGTTCACCGATCC
KIRREL*	dd_Smed_v4_12549_0_1	0.00 (-2.23 , 3.69)	0.402003	1.59036e-05	pharynx	kin of IRRE like (Drosophila) (KIRREL)	uc001frn.4	1e-15,	Ig_2, I-set, Ig_3, V-set, C2-set_2, ig,	PF13895.1, PF07679.11, PF13927.1, PF07686.12, PF08205.7, PF00047.20,	4.2e-19, 3e-16, 1.4e-14, 1.3e-11, 1.2e-09, 9.8e-06,		TCAGTCGGTTGCACTGCA	TCACCAGTGTACAAAAGGACA	ACGAAGGACTGGTTGGCAG
Posterior
		SCDE				Human best BLASTx			PFAM
Name	Contig	Log2 expression ratio	Z-score	cZ	ISH pattern	Description	id	E-val	Description	id	E-val	Notes	5' outer primer	5' inner primer	3' primer
Smed-fz4-1	dd_Smed_v4_11650_0_1	-5.85 (-10.05 , -3.66)	-5.7126	-3.83448	AP gradient	frizzled family receptor 10 (FZD10)	uc001uii.3	6e-114,	Frizzled, Fz,	PF01534.12, PF01392.17,	1.6e-90, 2.4e-27,	Gurley, 2008	NA	NA	NA
Smed-lox5a	dd_Smed_v4_16227_0_1	-6.62 (-9.14 , -3.95)	-5.63769	-3.83448	AP gradient	homeobox B7 (HOXB7)	uc002inv.3	8e-23,	Homeobox,	PF00046.24,	2.4e-11,	Currie, 2016	AAAGCACACCTCTCCGGC	CCGGCAATACTTGTTAATGATGT	CGTCGACGTCTTGTGAGGT
dd_53369	dd_Smed_v4_53369_0_1	-7.02 (-8.55 , -4.06)	-5.45262	-3.67031	unclear pattern	NA	NA	NA	NA	NA	NA		CTTGGTGTTACTGCGAAGGG	GACGGAGAAGGCTATGTTGG	TCGGTTTGGGGTACGATTTG
dd_33146	dd_Smed_v4_33146_0_1	-5.85 (-10.05 , -3.66)	-5.43336	-3.67031	no signal	NA	NA	NA	NA	NA	NA		CCGCCAAAACAGCTTCGG	AGGTTAAGCCTCACGGTTCA	CGAGAGGACCGGAGTGGA
dd_13065	dd_Smed_v4_13065_0_1	-5.92 (-9.10 , -3.58)	-5.38047	-3.64137	AP gradient	NA	NA	NA	Death,	PF00531.17,	1.8e-11,		TGATTTGCCTCCGACAAACG	TGGGATCAACATTACGGACTGG	TGTTTTGGATCCTTACCTCTCTT
sp5*	dd_Smed_v4_7824_0_1	-6.25 (-8.04 , -2.82)	-4.13847	-1.85168	AP gradient	Sp3 transcription factor (SP3)	uc002uif.3	2e-45,	zf-H2C2_2, zf-C2H2, zf-C2H2_4,	PF13465.1, PF00096.21, PF13894.1,	2.7e-12, 8.7e-12, 5.2e-09,	Reuter, 2015	NA	NA	NA
Smed-Post-2c	dd_Smed_v4_12467_0_1	-6.18 (-7.71 , -2.67)	-4.13755	-1.85168	AP gradient	homeobox C12 (HOXC12)	uc010soq.2	1e-15,	Homeobox,	PF00046.24,	1.3e-20,	Currie, 2016	AAACACACTTCGATGAGTTGGAC	GCGTGATTGTGCATGCGT	TTGGGTTTGCTGTAATTGGCA
ALX1*	dd_Smed_v4_21801_0_1	-7.86 (-9.76 , -4.02)	-3.91152	-1.46292	CNS	ALX homeobox 1 (ALX1)	uc001tae.4	3e-23,	Homeobox,	PF00046.24,	1.6e-22,		CCAATAATGACTGAAGCTGGCA	TTCAATCAATGCAACGAGAAGTT	AGGGCATTATGCGAGCCA
Smed-wnt11-2	dd_Smed_v4_16209_0_1	-5.85 (-7.64 , -2.41)	-3.73831	-1.10186	AP gradient	wingless-type MMTV integration site family, member 4 (WNT4)	uc001bfs.4	6e-38,	wnt,	PF00110.14,	3.7e-63,	Adell, 2009	NA	NA	NA
Smed-wnt11-1	dd_Smed_v4_14391_0_1	-5.52 (-7.31 , -2.12)	-3.55535	-0.696133	AP gradient, mouth	wingless-type MMTV integration site family, member 11 (WNT11)	uc001oxe.3	1e-32,	wnt,	PF00110.14,	6.6e-65,	Petersen, 2008	NA	NA	NA
dd_15686	dd_Smed_v4_15686_0_1	-5.52 (-7.31 , -2.12)	-3.51822	-0.630068	AP gradient, CNS	NA	NA	NA	NA	NA	NA		TCAACGGGGTCATCAACGA	TGAAGAGCCGACAAATGACA	TCGCAGGAAATTCAGCACT
Smed-hox4b	dd_Smed_v4_2442_0_1	-3.36 (-6.47 , -1.39)	-3.38733	-0.241097	AP gradient	homeobox C6 (HOXC6)	uc001ses.3	1e-30,	Homeobox,	PF00046.24,	1.5e-20,	Iglesias, 2008 (HoxD); Currie, 2016	NA	NA	NA
dd_4427	dd_Smed_v4_4427_0_1	-3.51 (-7.38 , -1.46)	-3.37463	-0.241097	AP gradient	NA	NA	NA	NA	NA	NA		TCTGAGCGGCAAACTTGAA	GCGAATGTCTATTGGATAGCACG	ACGTTGATCACATTCTTGCTGT
LMBR1L*	dd_Smed_v4_9923_0_1	-5.26 (-7.09 , -1.83)	-3.32404	-0.093649	unclear pattern	limb region 1 homolog (mouse)-like (LMBR1L)	uc001rth.4	8e-66,	LMBR1,	PF04791.11,	1.7e-73,		ACTCAGAAGCTGCGTCACA	TCACTGTGCATATCAAGTGGCA	AGGATCTGTATGACCTTTGGAGA
Smed-wntP-2	dd_Smed_v4_7326_0_1	-3.51 (-6.47 , -1.35)	-3.24407	-1.59036e-05	AP gradient	wingless-type MMTV integration site family, member 4 (WNT4)	uc001bfs.4	8e-76,	wnt,	PF00110.14,	6.1e-98,	Petersen, 2008	NA	NA	NA
LINGO4*	dd_Smed_v4_16092_0_1	-5.08 (-7.02 , -1.68)	-3.12922	-1.59036e-05	CNS	leucine rich repeat and Ig domain containing 4 (LINGO4)	uc021oyu.1	2e-10,	LRR_8, I-set, LRR_4, Ig_2, LRR_1,	PF13855.1, PF07679.11, PF12799.2, PF13895.1, PF00560.28,	3e-15, 1.7e-07, 1.5e-07, 7.2e-06, 9.9e-06,		TGCCGAAAAACGCAAGCA	TGCAGTAGACTCGAAACCAAA	ACCAAAGCAGGAGAGGAAGG
dd_7534	dd_Smed_v4_7534_0_1	-4.61 (-6.95 , -1.57)	-3.09798	-1.59036e-05	CNS, gut, parenchyma	NA	NA	NA	7tm_1,	PF00001.16,	1.2e-10,		GGATAACGGTCTACCTCAAACG	TCAGCAAAATATGTCAATGCCG	AATGTATTCTGGGCTGCAGG
CTNNB1*	dd_Smed_v4_9667_0_1	-3.58 (-7.02 , -1.32)	-3.09616	-1.59036e-05	AP gradient, CNS	catenin (cadherin-associated protein), beta 1, 88kDa (CTNNB1)	uc011azg.1	2e-14,	NA	NA	NA		TGCTCTATTGGGTGAGCGG	GAACCCCATTCGGATGTGAGA	TCGTCATTGGAATGTCGGTCT
IGFALS*	dd_Smed_v4_2769_0_1	-2.63 (-4.50 , -0.99)	-3.09542	-1.59036e-05	AP gradient, CNS	insulin-like growth factor binding protein, acid labile subunit (IGFALS)	uc002cmy.3	1e-12,	LRR_8, LRR_4, LRR_1,	PF13855.1, PF12799.2, PF00560.28,	6.4e-42, 2.8e-14, 4.3e-07,		GCATGCATCCAGTTGGCG	TGGGACCGAATTCGATTTGC	AGCTTGTGCAACTGGGCA
Smed-fz4-2	dd_Smed_v4_16926_0_1	-4.86 (-6.54 , -1.39)	-2.98922	-1.59036e-05	AP gradient	frizzled family receptor 10 (FZD10)	uc001uii.3	2e-64	Frizzled, Fz,	PF01534.12, PF01392.17,	3.1e-37, 2.6e-29,	partial fz4-2	AAACTCCACAAACTCTCTGCT	ATGCACACGAAGATGTCTACA	GGCAGAGTCCACGACACG
dd_11512	dd_Smed_v4_11512_0_1	-4.83 (-6.69 , -1.35)	-2.86455	-1.59036e-05	unclear pattern	NA	NA	NA	NA	NA	NA		TGGTGGGACATTCATAATGGC	TGGGACAAACTGAATATTACGCT	AACTCGTCTGTGCTGCGA
Smed-fz4-2	dd_Smed_v4_13186_0_1	-4.72 (-6.54 , -1.28)	-2.85317	-1.59036e-05	AP gradient	frizzled family receptor 9 (FZD9)	uc003tyb.3	2e-20,	Frizzled,	PF01534.12,	8.4e-35,	partial fz4-2	TCCCTGCCATTAGTACGACA	AATAGATCCGGATGAATTGCTTG	AGGAAAAGGGGGAGGGCC
dd_12494	dd_Smed_v4_12494_0_1	-3.47 (-6.32 , -1.10)	-2.85217	-1.59036e-05	no PCR	NA	NA	NA	7tm_1,	PF00001.16,	3.1e-17,		GGTTGATTTGCTCCTCAGTCC	TGAAAATGCAATTTCTGTCGTCG	GCTGCTAAGCTACGGCAA
Smed-wntless	dd_Smed_v4_9546_0_1	-3.07 (-5.96 , -0.91)	-2.77268	-1.59036e-05	AP gradient	wntless homolog (Drosophila) (WLS)	uc001deg.2	2e-109,	MIG-14_Wnt-bd,	PF06664.7,	1.9e-73,	Adell, 2009	NA	NA	NA
NOS1AP*	dd_Smed_v4_13377_0_1	-4.57 (-7.86 , -1.43)	-2.76016	-1.59036e-05	no PCR	nitric oxide synthase 1 (neuronal) adaptor protein (NOS1AP)	uc010pkr.1	3e-53,	PID,	PF00640.18,	3.1e-18,		CGGATCCATGGACGTCGC	GACCTCAGAATCGCCTGGA	ATCACCGTTGACGTGGGG
LPCAT1*	dd_Smed_v4_4812_2_1	-2.56 (-4.39 , -0.73)	-2.69497	-1.59036e-05	unclear pattern	lysophosphatidylcholine acyltransferase 1 (LPCAT1)	uc003jcm.3	2e-26,	NA	NA	NA		TGCTTGTTTGTAAATTTTGGCGC	ACATGATGCATTGGGGTATGA	GGTGCCATGTTGGAGCCA
WDR36*	dd_Smed_v4_6943_0_1	-4.50 (-6.43 , -1.06)	-2.69451	-1.59036e-05	no PCR	WD repeat domain 36 (WDR36)	uc003kpd.3	5e-98,	Utp21, WD40,	PF04192.7, PF00400.27,	4.8e-21, 2e-11,		GTGACGGCCGAGTGTTGA	TGGATTTAGTGCATGACATTGTG	ATCAGTTCCTGTGGCGCC
PDIA4*	dd_Smed_v4_4906_0_1	-4.64 (-6.58 , -1.13)	-2.6869	-1.59036e-05	unclear pattern	protein disulfide isomerase family A, member 4 (PDIA4)	uc003wff.2	3e-127,	Thioredoxin, Thioredoxin_6	PF00085.15, PF13848.1	1.6e-64, 1.8e-24		GCACCTTGGTGCGGTCAT	ATACCAAGGCAGCCGTTCA	AGCAAACTCTCGCCAGGA
Smed-Post-2d	dd_Smed_v4_12317_0_3	-2.74 (-5.30 , -0.73)	-2.67959	-1.59036e-05	AP gradient	homeobox A9 (HOXA9)	uc003syt.3	1e-17	Homeobox,	PF00046.24,	8.5e-20,	Iglesias, 2008 (abd-Ba); Currie, 2016	NA	NA	NA
dd_3082	dd_Smed_v4_3082_0_1	-3.95 (-5.59 , -0.99)	-2.6713	-1.59036e-05	unclear pattern	NA	NA	NA	NA	NA	NA		TCGAATCAGGGTTAGTCGGG	CGAAAGGGGAATCTGATGGC	GGCTCTCTCAAATCTGCAGC
PCDH1*	dd_Smed_v4_23085_0_1	-5.01 (-7.06 , -1.35)	-2.66091	-1.59036e-05	CNS	protocadherin 1 (PCDH1)	uc011dbf.2	1e-49,	Cadherin,	PF00028.12,	3.5e-52,		ACCACCGGCCGAACATTT	AGAACCTCGACCCAACTCCT	CGGTGGCGTCGTTTGAGA
FAM160A1*	dd_Smed_v4_9831_0_1	-2.85 (-5.89 , -0.77)	-2.64946	-1.59036e-05	AP gradient, CNS	family with sequence similarity 160, member A1 (FAM160A1)	uc003imj.2	2e-62,	RAI16-like,	PF10257.4,	6e-42,		TGTCCCCGGTTTCGAGTG	GCGAATCATGAGGATAGGCCA	CGCCCGGGTGAGTCAATT
Smed-axinB	dd_Smed_v4_5531_0_1	-2.74 (-5.26 , -0.73)	-2.64238	-1.59036e-05	AP gradient	axin 2 (AXIN2)	uc002jfj.1	2e-15,	RGS,	PF00615.14,	6.4e-18,	Iglesias, 2011	NA	NA	NA
TPH1*	dd_Smed_v4_8392_0_1	-4.39 (-6.22 , -0.95)	-2.63627	-1.59036e-05	CNS	tryptophan hydroxylase 1 (TPH1)	uc001mnp.2	0,	Biopterin_H, ACT,	PF00351.16, PF01842.20,	2.2e-175, 3.4e-05,		GTCGGTGGGCGAGAGTTC	ACGGCCAAAACCAGACGA	GGAATCTGTGGAGTCGAGGG
ABHD12*	dd_Smed_v4_7803_0_1	-4.42 (-6.51 , -0.99)	-2.63379	-1.59036e-05	unclear pattern	abhydrolase domain containing 12 (ABHD12)	uc002wus.2	2e-43,	Abhydrolase_5, Abhydrolase_6, Peptidase_S9,	PF12695.2, PF12697.2, PF00326.16,	1.6e-17, 4.6e-13, 1.4e-05,		GTGTTTACCAACTTGAAGAAGCC	TTCTAAATGCGAACTTGGAGCT	AGCCTACTGATATCATTTCGCGA
dd_1	dd_Smed_v4_1_0_1	-2.67 (-4.83 , -0.69)	-2.63291	-1.59036e-05	gut	NA	NA	NA	NA	NA	NA		CAAAACTGAGGAATTGGCAAATG	CAGTCGCTTTAGAAAACGCA	CTACAATCCACAGAAGCCGC
MAPKAP1*	dd_Smed_v4_11576_0_1	-4.24 (-6.62 , -1.02)	-2.6205	-1.59036e-05	no signal	mitogen-activated protein kinase associated protein 1 (MAPKAP1)	uc004bpv.3	6e-23,	SIN1,	PF05422.7,	8.9e-22,		TCAGCGAATGGCCAAGAGT	TGATTTATTCGGTGTCAGCAATG	CCGGACGTGGATTGGCAA
dd_14161	dd_Smed_v4_14161_0_1	-4.61 (-6.76 , -1.10)	-2.6163	-1.59036e-05	unclear pattern	NA	NA	NA	NA	NA	NA		GGTCGGATGTCAGTGACGG	CCGTATGAAAATATTTGGTGGCG	TGACTGGACACCGCCAAG
PAK1*	dd_Smed_v4_3361_0_1	-4.42 (-6.47 , -0.99)	-2.60628	-1.59036e-05	unclear pattern	p21 protein (Cdc42/Rac)-activated kinase 1 (PAK1)	uc010rsn.2	1e-16,	Pkinase, Pkinase_Tyr,	PF00069.20, PF07714.12,	5.6e-38, 2.4e-35,		AATGGCCGCATTCTCGAT	AAAAGTGAAATGGAATTGCCGGA	TCGAAACGAAATTCAAGCACCA
dd_15789	dd_Smed_v4_15789_0_1	-4.97 (-7.35 , -0.99)	-2.60234	-1.59036e-05	no PCR	NA	NA	NA	NA	NA	NA		GGGGAGCATTGTGTAAGCCT	AGCATGCTGGAGGTATCACA	CGATCCCCTCACACCAGC
SLC17A5*	dd_Smed_v4_8907_0_1	-4.53 (-6.69 , -0.99)	-2.51743	-1.59036e-05	unclear pattern	solute carrier family 17 (anion/sugar transporter), member 5 (SLC17A5)	uc003phn.4	2e-73,	MFS_1,	PF07690.11,	2.2e-48,		GCATGGATGGGATTTCTGGGA	TGAGGGTTAACATTAGCGTTGC	ACTGTCGGTTCTCTCATCTTCA
dd_10294	dd_Smed_v4_10294_0_1	-3.00 (-6.00 , -0.62)	-2.45086	-1.59036e-05	CNS	NA	NA	NA	NA	NA	NA		CCGTCTTCGACAGAGGCG	TGGGTTCATTTTGGCCGGT	GGATCTGGATCAGCGCCG
POLN*	dd_Smed_v4_30834_0_1	-2.60 (-5.08 , -0.33)	-2.22513	-1.59036e-05	gut	polymerase (DNA directed) nu (POLN)	uc003ger.2	4e-62,	DNA_pol_A	PF00476.15	1e-160,		ATCGCTCGCGGCTCTTAC	TGGACCGCTGATCGTCAC	CAGCAACGCGGCCTTTTT
dd_17732	dd_Smed_v4_17732_0_1	-3.80 (-5.89 , -0.18)	-2.053	-1.59036e-05	CNS	NA	uc004bhq.3	1e-25,	PDZ, C2,	PF00595.19, PF00168.25,	3.6e-11, 1.1e-06,		CGGTGCAATTTCGAGCGG	TCGAATGAAAACATTACCGACTC	GGAGGACGCGTGGGAAAA
PARD3B*	dd_Smed_v4_9476_0_1	-3.73 (-5.78 , -0.07)	-1.99936	-1.59036e-05	CNS	par-3 partitioning defective 3 homolog B (C. elegans) (PARD3B)a	uc010fub.2	1e-16,	PDZ, PDZ_2,	PF00595.19, PF13180.1,	7.2e-23, 1.5e-12,		ACATGTTTGTGAAAGAAAAGCGT	TGATTCTTGATTTTAGTCCCGCA	GCTGATCGCATTGGTTGACA
FARP2*	dd_Smed_v4_12715_0_1	-3.07 (-5.92 , -0.04)	-1.96084	-1.59036e-05	CNS, boundary, pharynx	FERM, RhoGEF and pleckstrin domain protein 2 (FARP2)	uc010zoq.2	2e-65,	FERM_C, FERM_N, FERM_M,	PF09380.5, PF09379.5, PF00373.13,	5.7e-23, 3.8e-11, 2.1e-06,		GGGAGCGGCTTAAAACGG	TTGCTTGCAATTTGGGAATCACA	CGCTGAAGCTGCGTTTCTG
dd_21924	dd_Smed_v4_21924_0_1	-3.44 (-5.52 , 0.15)	-1.86997	-1.59036e-05	unclear pattern	NA	uc011cqt.2	4e-46,	7tm_1, 7TM_GPCR_Srsx,	PF00001.16, PF10320.4,	3.5e-72, 6.6e-08,		ACGCCCAATCTTTCAGCGA	CCTGGAATGACATTTGTGGCC	TCACTGTTGAATCCGGACAACT
PCDH1*	dd_Smed_v4_14344_0_1	-3.98 (-6.32 , 0.44)	-1.75394	-1.59036e-05	CNS	protocadherin 1 (PCDH1)	uc011dbf.2	3e-66,	Cadherin, Cadherin_2,	PF00028.12, PF08266.7,	1.5e-69, 4.4e-14,		CGATGCCGGTGAAGACCA	TCAACGATGTCAACGACAATCG	TCTGACGCTAAGCCGTGC
KLHL2*	dd_Smed_v4_5640_0_1	-2.30 (-5.15 , 0.29)	-1.74084	-1.59036e-05	unclear pattern	kelch-like family member 2 (KLHL2)	uc003irb.3	0,	Kelch_1, Kelch_6, BTB, Kelch_2, Kelch_3	PF01344.20, PF13964.1, PF00651.26, PF07646.10, PF13415.1	2.3e-85, 1.2e-47, 2e-34, 3.4e-34, 5.4e-32		AAGCTGGGGACTTGGAGA	TGCTCACAAAGTGATTCTAGCA	GAGTTACCACGCCGGCAT
SLC10A2*	dd_Smed_v4_11330_0_1	-3.18 (-5.41 , 0.58)	-1.6308	-1.59036e-05	gut	solute carrier family 10 (sodium/bile acid cotransporter family), member 2 (SLC10A2)	uc001vpy.4	2e-36,	SBF,	PF01758.11,	1.2e-27,		TGTGCGCACAAACACACG	CACTCAATGTGCGCTGAATAA	AGTTGCCAGCTGTTCGGG
TCF4*	dd_Smed_v4_5579_0_1	-1.72 (-4.94 , 0.58)	-1.45937	-1.59036e-05	unclear pattern	transcription factor 4 (TCF4)1	uc021ukh.1	5e-39,	HLH,	PF00010.21,	1.6e-12,		CGCTCGCACCAAAACCAG	GCCAGTGCTAGATTTAACAACGA	ATTTGCTTGGCGACGGGA
EYA1*	dd_Smed_v4_11372_0_1	-3.03 (-5.23 , 1.28)	-1.35238	-1.59036e-05	pharynx	eyes absent homolog 1 (Drosophila) (EYA1)	uc003xyv.3	2e-156,	NA	NA	NA		TAGTTCAGCCGCAACTGCA	TCAACCGAATCCCTCCTCA	CCTTTGCCAGTGCGGGTA
dd_3443	dd_Smed_v4_3443_0_1	-1.61 (-4.50 , 0.73)	-1.33777	-1.59036e-05	gut	NA	uc002mta.1	9e-17,	zf-H2C2_2, zf-C2H2, zf-C2H2_4,	PF13465.1, PF00096.21, PF13894.1,	5e-14, 1.8e-08, 2.7e-08,		TTTAGCGTGTGATTGTCAATTGA	ACAGATGACAGACAGAACATCG	TGCTTGATTAGTATTGACGCTGT
PCDH9*	dd_Smed_v4_7930_0_1	-2.67 (-4.90 , 1.35)	-1.26676	-1.59036e-05	unclear pattern	protocadherin 9 (PCDH9)	uc010thl.2	3e-45,	Cadherin,	PF00028.12,	2.2e-59,		TCTGGTCTGCATGGGGGT	GGACTTTGAGGGCCCGTT	TGGTGAAACAGACGGGGTG
dd_12571	dd_Smed_v4_12571_0_1	-2.71 (-5.01 , 1.90)	-1.09472	-1.59036e-05	CNS, pharynx	NA	uc003oue.1	2e-35,	Pkinase_Tyr, Pkinase, F5_F8_type_C,	PF07714.12, PF00069.20, PF00754.20,	1.3e-57, 8.5e-28, 4e-13,		TGCAGAGGTCCAGGAGGA	TGAGTTGGTTGCACAGTGC	CAGGTCCAGCAGTGCCTC
MEF2BNB*	dd_Smed_v4_5317_0_1	-1.02 (-4.64 , 1.28)	-0.900916	-1.59036e-05	CNS	MEF2BNB-MEF2B readthrough (MEF2BNB-MEF2B)	uc010xqp.1	2e-45,	SRF-TF,	PF00319.13,	3.6e-23,		GCGACTGCGAAATAGCTCT	ACGCTAGTTCAGACATGGATCA	AGACATGTTACGACGAGGCA
NPHS1*	dd_Smed_v4_10689_0_1	-2.01 (-4.72 , 2.16)	-0.875304	-1.59036e-05	CNS, boundary	nephrosis 1, congenital, Finnish type (nephrin) (NPHS1)	uc002oby.3	1e-60,	I-set, Ig_2, C2-set_2, Ig_3, V-set, ig,	PF07679.11, PF13895.1, PF08205.7, PF13927.1, PF07686.12, PF00047.20,	1.6e-51, 1.6e-48, 2.3e-26, 1.6e-25, 4.8e-19, 3.5e-16,		TAAGCTCGTCCCCGGGAA	TCCAGTTCAGATTTAGTCCCTGC	AGTTGCATTTGCCGGAGC
EXOC6B*	dd_Smed_v4_2186_0_1	-0.69 (-3.29 , 1.46)	-0.640169	-1.59036e-05	gut	exocyst complex component 6B (EXOC6B)	uc010fep.3	1e-128,	Sec15,	PF04091.7,	1.3e-41,		CGGAATGCTCGATGAACCG	TCACTGGAATCGTACGGTAAC	AAGCAAGCACGCGGTTTG
IGFALS*	dd_Smed_v4_3513_0_1	-0.51 (-4.42 , 3.00)	-0.357516	-1.59036e-05	unclear pattern	insulin-like growth factor binding protein, acid labile subunit (IGFALS)	uc010uvn.2	3e-16,	LRR_8, LRR_5, LRR_4, LRR_1,	PF13855.1, PF13306.1, PF12799.2, PF00560.28,	3.2e-62, 4.3e-23, 2.1e-17, 2.9e-09,		AAAACGATGAGATTTTGCATCCA	TGACATTGAATTATTCGGCGCA	TACAAAGTTGATTGCATCATGGG

## Sheet: Supplementary File 1D
Supplementary File 1D. Head (region 1) versus post-pharyngeal (regions 7-9) SCDE analysis and ISH results
All genes with p<0.005 (|Z|>2.58) in this SCDE analysis are shown above double line, with non-significant genes screened by ISH listed below double line.
* indicates name is human best BLASTx hit; SCDE log2 expression ratio calculated as maximum likelihood estimate (lower bound, upper bound); cZ is Z score corrected for multiple hypothesis using Holm procedure
Head
		SCDE				Human best BLASTx			PFAM
Name	Contig	Log2 expression ratio	Z-score	cZ	ISH pattern	Description	id	E-val	Description	id	E-val	Notes	5' outer primer	5' inner primer	3' primer
Smed-ndl-4	dd_Smed_v4_12674_0_1	7.49 (4.79 , 10.35)	6.21	4.38251	AP gradient	fibroblast growth factor receptor-like 1 (FGFRL1)	uc010ibo.3	8e-22,	I-set, Ig_2, ig, V-set, Ig_3, Receptor_2B4,	PF07679.11, PF13895.1, PF00047.20, PF07686.12, PF13927.1, PF11465.3,	1e-27, 2e-17, 9.2e-14, 4.3e-11, 3e-08, 7e-06,	Rink, 2009	NA	NA	NA
Smed-ndl-2	dd_Smed_v4_8340_0_1	8.08 (4.86 , 10.42)	5.75	3.89037	AP gradient	fibroblast growth factor receptor 3 (FGFR3)	uc003gdq.3	5e-09,	I-set, Ig_3, Ig_2, V-set, ig,	PF07679.11, PF13927.1, PF13895.1, PF07686.12, PF00047.20,	4.1e-17, 2.7e-14, 4.1e-14, 1.8e-12, 3.8e-09,		GATGCAGTCTGACCCGCA	TGCAACAGGAAGGAAAGTTACTG	ACCCTGTTGAACCAAGCCA
Smed-fz5/8-4	dd_Smed_v4_11823_0_1	6.95 (4.31 , 10.31)	5.67	3.87828	AP gradient, CNS	frizzled family receptor 5 (FZD5)	uc021vvr.1	0,	Frizzled, Fz,	PF01534.12, PF01392.17,	3.4e-123, 6e-32,		GATGCGCTCCCGTCATGA	TGGCCGAAAAGTATGGATTGTG	TGCTGAACGTTGCCAGCA
Smed-ndk	dd_Smed_v4_11285_0_1	5.67 (3.33 , 9.80)	5.04	3.0222	AP gradient, CNS	fibroblast growth factor receptor-like 1 (FGFRL1)	uc010ibo.3	4e-15,	I-set, Ig_2, Ig_3, V-set, ig,	PF07679.11, PF13895.1, PF13927.1, PF07686.12, PF00047.20,	1.4e-19, 6.8e-15, 2.1e-11, 1.1e-08, 4.2e-07,	Rink, 2009	NA	NA	NA
Smed-wnt2	dd_Smed_v4_13487_0_1	6.14 (2.60 , 8.74)	3.45	3.53476e-05	AP gradient	wingless-type MMTV integration site family, member 2B (WNT2B)WNT-2B1	uc001eca.3	1e-88,	wnt,	PF00110.14,	4e-103,	Petersen, 2008	NA	NA	NA
NCAM1*	dd_Smed_v4_7422_0_1	4.02 (1.75 , 6.98)	3.43	3.53476e-05	CNS, dotty	neural cell adhesion molecule 1 (NCAM1)	uc001pnq.3	9e-08,	I-set, V-set, Ig_2, Ig_3, ig,	PF07679.11, PF07686.12, PF13895.1, PF13927.1, PF00047.20,	4.9e-16, 2.3e-11, 7.3e-11, 4.9e-07, 3.5e-06,		TCACCCAGACGGAGCTGA	TGTATTTCCCGAAAAATCGTCCT	CGACCCCAGACGATCCAG
Smed-ndl-1	dd_Smed_v4_8310_0_1	6.54 (3.22 , 8.85)	3.32	3.53476e-05	AP gradient, CNS	fibroblast growth factor receptor-like 1 (FGFRL1)	uc010ibo.3	7e-08,	I-set,	PF07679.11,	2.3e-07,		CCCCCGGCCATATTTCCG	TGAACAAGGAACATACAGGTCA	TGACCTGGAAAATAGGCGGT
HVCN1*	dd_Smed_v4_15085_0_1	5.96 (2.38 , 8.52)	3.25	3.53476e-05	CNS, boundary	hydrogen voltage-gated channel 1 (HVCN1)	uc010syd.1	4e-12,	NA	NA	NA		TGGTTGACGCTGGGATCG	ACTCTATAGAAGCCCATCAGGA	TCGCTGCCAATGTGGTGA
Smed-ndl-5	dd_Smed_v4_5102_0_1	4.72 (1.94 , 7.71)	3.25	3.53476e-05	AP gradient, CNS	NA	NA	NA	I-set, V-set,	PF07679.11, PF07686.12,	4.9e-07, 2.2e-05,		GGTCAGCCAAAGTCCCCC	ACAGTATTTCTTAACACGGGTCA	TGAACCATACGGAGCGGT
Smed-sFRP-1	dd_Smed_v4_13985_0_1	5.67 (1.68 , 8.96)	3.23	3.53476e-05	AP gradient	secreted frizzled-related protein 5 (SFRP5)	uc001kor.4	2e-37,	Fz,	PF01392.17,	1.9e-29,	Petersen, 2008	NA	NA	NA
DNAJB13*	dd_Smed_v4_4820_0_1	4.94 (1.86 , 7.68)	3.11	3.53476e-05	AP gradient	DnaJ (Hsp40) homolog, subfamily B, member 13 (DNAJB13)	uc001ouo.3	9e-133,	DnaJ_C, DnaJ,	PF01556.13, PF00226.26,	3.2e-24, 1e-21,		ACTCTGCATTCAAAGAAATGCA	TGCACTGAAGCTCCATCCA	TCATTGTTATCGTAGAATGGCCT
dd_8607	dd_Smed_v4_8607_0_1	5.37 (1.94 , 7.86)	3.11	3.53476e-05	no PCR	NA	NA	NA	CD225,	PF04505.7,	2.4e-06,		TGATAATTGCATTGGAGCGCTC	AGCTTCTGAATTGCACGAACA	TTTTGGACAAAGGCGACCT
PCDH1*	dd_Smed_v4_17019_0_1	5.92 (2.49 , 8.34)	3.09	3.53476e-05	no PCR	protocadherin 1 (PCDH1)	uc011dbf.2	3e-73,	Cadherin, Cadherin_2,	PF00028.12, PF08266.7,	1e-81, 6.1e-12,		AGCACTTAGATCGGGAGCTC	CAATCCGAATACTGGGACGC	TCATTTGCTCGGATTTGGGC
Smed-notum	dd_Smed_v4_24180_0_1	6.73 (2.89 , 9.87)	3.04	3.53476e-05	anterior pole, CNS	notum pectinacetylesterase homolog (Drosophila) (NOTUM)	uc010wvg.2	6e-73,	PAE,	PF03283.8,	4.9e-68,	Petersen, 2011	NA	NA	NA
PPP1R37*	dd_Smed_v4_5089_0_1	4.79 (1.46 , 7.46)	2.89	3.53476e-05	gut	protein phosphatase 1, regulatory subunit 37 (PPP1R37)	uc021uvs.1	2e-105,	LRR_6,	PF13516.1,	4.7e-11,		ACCAAGTGTTCCAAATGAGAGA	ACCACCTGAAACAAACACTTTTG	TCTGCATAGGGATCATTTGGCA
TRPC4*	dd_Smed_v4_15627_0_1	5.59 (1.94 , 8.19)	2.89	3.53476e-05	CNS	transient receptor potential cation channel, subfamily C, member 4 (TRPC4)beta	uc001uwt.3	0,	Ion_trans, TRP_2, Ank_2, PKD_channel, Ank_4, Ank, Ank_3,	PF00520.26, PF08344.6, PF12796.2, PF08016.7, PF13637.1, PF00023.25, PF13606.1,	1.3e-32, 2.8e-29, 4.2e-15, 1.2e-11, 1.4e-08, 3.8e-06, 5.1e-05,		GTCGCGATCCTCTAGGGC	TGCCATTGAATATGAGCACATTG	GGCCACATGCAAATGCCA
Smed-zic-2	dd_Smed_v4_15531_0_1	3.51 (1.06 , 6.22)	2.89	3.53476e-05	AP gradient	Zic family member 2 (ZIC2)	uc001von.3	5e-79,	zf-H2C2_2, zf-C2H2, zf-C2H2_4,	PF13465.1, PF00096.21, PF13894.1,	4e-17, 9.3e-13, 7.5e-08,		TAAGCTCGGCCGCGAATT	GAGCGAATCCGATTTGTGTGG	TTGCGCAAAGAGCTGGGA
ENDOG*	dd_Smed_v4_14758_0_1	4.50 (1.35 , 7.09)	2.85	3.53476e-05	unclear pattern	endonuclease G (ENDOG)	uc004bwc.3	3e-47,	Endonuclease_NS,	PF01223.18,	4.8e-50,		GCAGTCTTTAGTGCTGGAGGT	TGATTTTATCAATGCTGAGGCAG	ACGTGGCTTTACATGGATTCT
dd_10774	dd_Smed_v4_10774_0_1	5.48 (1.94 , 7.97)	2.84	3.53476e-05	no PCR	NA	NA	NA	NA	NA	NA		TCCGTAGTAGTTTTGGTGCAA	TCCAAATTCAGAAAGTGATCGGT	AGTGGCCTTTCATGGGTGA
KCNN3*	dd_Smed_v4_14006_0_1	5.23 (1.72 , 7.68)	2.79	3.53476e-05	CNS	potassium intermediate/small conductance calcium-activated channel, subfamily N, member 3 (KCNN3)	uc001ffp.3	6e-132,	SK_channel, CaMBD, Ion_trans_2,	PF03530.9, PF02888.11, PF07885.11,	1.1e-44, 4.7e-30, 2.1e-14,		CCCATCAGAGGAGCCGTC	AGCAAATCAGGAAAGGTCACCA	CGGTGCATGCTGATCCCA
dd_12259	dd_Smed_v4_12259_2_2	3.33 (0.95 , 5.81)	2.75	3.53476e-05	CNS	NA	NA	NA	NA	NA	NA		AAAGGCGACGCTCCAACA	AAAGGAAGTGACTGGAACGAT	ACCCACTTTTCATACATGCGT
KCNMA1*	dd_Smed_v4_20110_0_1	5.05 (1.50 , 7.49)	2.69	3.53476e-05	unclear pattern	potassium large conductance calcium-activated channel, subfamily M, alpha member 1 (KCNMA1)6	uc001jxq.3	0,	BK_channel_a, Ion_trans_2, TrkA_N,	PF03493.13, PF07885.11, PF02254.13,	9.1e-29, 1.9e-14, 0.0001,		CAGTTCCACCCGCCTTCA	TTGGGTCGGTTTGAGGTTCA	TGGGAACGTCGTTTGGCA
KIRREL3*	dd_Smed_v4_13803_0_1	4.53 (1.10 , 7.06)	2.63	3.53476e-05	CNS	kin of IRRE like 3 (Drosophila) (KIRREL3)	uc001qec.1	2e-07,	V-set, I-set,	PF07686.12, PF07679.11,	7.4e-10, 3.9e-08,		TGGTGCTTACCAGTAACGATTCA	TTATTTCGGAGCCAATGTTGCT	ACCAGTTGCGGCTTGTCT
UBE2H*	dd_Smed_v4_4514_0_1	3.62 (0.99 , 6.47)	2.63	3.53476e-05	CNS	ubiquitin-conjugating enzyme E2H (UBE2H)	uc003vpf.2	9e-81,	UQ_con,	PF00179.21,	3.9e-36,		TGTCTTCTCCAAGTCCTGGT	TGATGGTGAAATTCTATGGTCCT	AGGCACCACACAGATTTGT
dd_7323	dd_Smed_v4_7323_0_1	3.29 (0.95 , 6.40)	2.62	3.53476e-05	no PCR	NA	uc001tye.1	9e-72,	RRM_1, RRM_6, RRM_5,	PF00076.17, PF14259.1, PF13893.1,	9.1e-37, 2.5e-32, 3.8e-10,		CAGCCGCATAATAAACGCGT	TCTCTCTGGTTTTTGTCAGTTGA	GTGTACACATGGGCTCGGT
ITGAV*	dd_Smed_v4_11655_0_1	2.89 (0.73 , 5.12)	2.62	3.53476e-05	unclear pattern	integrin, alpha V (ITGAV)	uc002upq.3	2e-23,	Integrin_alpha2, FG-GAP, VCBS,	PF08441.7, PF01839.18, PF13517.1,	2.8e-23, 9.2e-15, 3.4e-07,		GTGCTCGGTGACTGATGAAG	CAAGGTTGCTCTAGGAATGCC	GAACTGGACGAGGTTGGTTG
LRIG2*	dd_Smed_v4_11266_0_1	3.11 (0.77 , 6.03)	2.62	3.53476e-05	CNS	leucine-rich repeats and immunoglobulin-like domains 2 (LRIG2)	uc009wgn.1	3e-20,	LRR_8, LRR_4, I-set, Ig_2, LRR_1,	PF13855.1, PF12799.2, PF07679.11, PF13895.1, PF00560.28,	4.5e-21, 1.5e-09, 3.3e-07, 4.9e-06, 8.8e-05,		AACCCATTGCCAGACGCT	TCAACTCTCTCATTGACGTTTTC	GTTCGGTTCGTCGTCGGA
dd_6701	dd_Smed_v4_6701_0_1	3.73 (0.91 , 6.76)	2.6	3.53476e-05	no PCR	NA	NA	NA	UCH,	PF00443.24,	1.4e-10,		TGAAACTGGAACTGCACCGA	ACCATAAATGCGACGAGTGA	GAGCACTGTGACCCCAGG
dd_10073	dd_Smed_v4_10073_0_1	3.25 (0.80 , 6.22)	2.58	3.53476e-05	CNS, ventral dots	NA	NA	NA	NA	NA	NA		GCTCGGATTGTCACGCCA	AGAACGAATGCTTCAAAGAGCT	CTTGGCGGCTTTGTTGGG
dd_3000	dd_Smed_v4_3000_0_1	2.49 (0.51 , 4.72)	2.5	3.53476e-05	epidermis	NA	NA	NA	Shisa,	PF13908.1,	6.5e-10,		GTGGTGGATATCGAAGTGGGA	AGTGGGAGCAGTGGAGGG	TGACTAGACGAGAAACATGTGGG
Smed-prep	dd_Smed_v4_8606_0_1	3.14 (0.62 , 5.92)	2.5	3.53476e-05	AP gradient	PBX/knotted 1 homeobox 2 (PKNOX2)	uc010sba.2	1e-61,	Homeobox_KN, Homeobox,	PF05920.6, PF00046.24,	8.6e-19, 7.8e-08,	Felix, 2010	NA	NA	NA
dd_11077	dd_Smed_v4_11077_0_1	5.08 (1.21 , 7.82)	2.48	3.53476e-05	CNS, ventral dots	NA	NA	NA	Innexin,	PF00876.13,	1.3e-118,		TGGTACGCTGGTCGGTTT	CGATTTTGCTGATCGGCTCA	TCCAACGGGCTCGACTTT
RGMB*	dd_Smed_v4_14090_0_1	3.91 (0.77 , 7.28)	2.44	3.53476e-05	boundary	RGM domain family, member B (RGMB)	uc003knc.3	6e-13,	RGM_N,	PF06535.7,	2e-17,		CCCTACGTGTTGGGAGACA	AAAATTCGTTCGCGTTGTGA	TCTCATCATCAATAGCTGCACA
FAT4*	dd_Smed_v4_19860_0_1	5.30 (1.35 , 8.04)	2.41	3.53476e-05	CNS	FAT atypical cadherin 4 (FAT4)	uc011cgp.2	3e-55,	Cadherin,	PF00028.12,	5.9e-39,		TCGACCGTGACGATGAGA	TGTGGACCTCTTCAATGTTGT	GGGTTGTTGATTGGGGTGC
MAPK7*	dd_Smed_v4_4300_0_1	3.11 (0.55 , 6.51)	2.38	3.53476e-05	unclear pattern	mitogen-activated protein kinase 7 (MAPK7)	uc002gvp.3	3e-88,	Pkinase, Pkinase_Tyr,	PF00069.20, PF07714.12,	5.1e-72, 1e-32,		TCGCAGATTTCGGTATGGCA	CCCAATATGTCATGACTCGATGG	ACGCAGAGTTAACAAACTGCA
Smed-zic-1	dd_Smed_v4_22585_0_1	3.25 (0.44 , 7.17)	2.29	3.53476e-05	AP gradient	Zic family member 3 (ZIC3)	uc004fak.3	5e-85,	zf-H2C2_2, zf-C2H2, zf-C2H2_4,	PF13465.1, PF00096.21, PF13894.1,	1.1e-20, 3e-13, 1.4e-06,	Vazquez-Doorman, 2014	NA	NA	NA
dd_65328	dd_Smed_v4_65328_0_1	4.57 (0.66 , 7.38)	2.25	3.53476e-05	no signal	NA	NA	NA	NA	NA	NA		ACACGATGAGGACCAATTACA	ACAAAAACAGTGTGCGATGTGT	AGCGCCTTGAAAGACTGGT
dd_18678	dd_Smed_v4_18678_0_1	4.53 (0.58 , 7.24)	2.21	3.53476e-05	no signal	NA	NA	NA	NA	NA	NA		TCAGACTACCGCCAGAAGC	ACTCCACTTTTCCTCGATCAGA	ACGTCATGCGCCTAACGG
MFSD9*	dd_Smed_v4_9599_0_1	4.28 (0.44 , 6.76)	2.17	3.53476e-05	unclear pattern	major facilitator superfamily domain containing 9 (MFSD9)	uc002tcb.2	2e-36,	MFS_1, Sugar_tr,	PF07690.11, PF00083.19,	1.6e-37, 4.4e-07,		CCCCTGTTTTAGTAGTTACCTGT	ACCTCACTGCCTTTACACGT	GGCAGCACTGAAGAAAATCGG
TRAPPC8*	dd_Smed_v4_7549_0_1	3.11 (0.22 , 5.78)	2.09	3.53476e-05	CNS	trafficking protein particle complex 8 (TRAPPC8)	uc002kxc.4	0,	TRAPPC-Trs85,	PF12739.2,	1.8e-104,		CACAAGCCCCACGGACAA	TGGACCATGAACAAATCCGACA	ACAAAGGCTGCCTTCGTCA
dd_18607	dd_Smed_v4_18607_0_1	4.09 (0.15 , 6.69)	2.03	3.53476e-05	unclear pattern	NA	NA	NA	7tm_1,	PF00001.16,	2.8e-13,		GAGAGCAAACAGATTCAGGAACA	TCTACCTGATCCAAATAGCTGGT	CACAGAGGAGCACCAATACGT
dd_13460	dd_Smed_v4_13460_0_1	3.40 (0.07 , 6.80)	2.01	3.53476e-05	unclear pattern	NA	NA	NA	NA	NA	NA		CCCTTCCCATGAGCACGA	TGGTATCAGTCGAACGTTTCT	TCGTCCGCTCGTTAGGGA
dd_26780	dd_Smed_v4_26780_0_1	3.14 (-0.11 , 6.36)	1.92	3.53476e-05	unclear pattern	NA	NA	NA	7tm_1,	PF00001.16,	2.1e-10,		TCGAGTTTTCCCATGTTGTGAC	TGTGTCGTGGTTCGTTCCC	CAAACGGTAAATTTGCCAAGAGA
dd_15072	dd_Smed_v4_15072_0_1	4.24 (-0.15 , 6.76)	1.91	3.53476e-05	unclear pattern	NA	NA	NA	Folate_rec,	PF03024.9,	1.6e-10,		TGGCAATTCAAGTCTCGTTTGT	TTTTGCTTCCAATAGGTATTCCG	GCTAATTCCCTCCAATAAATGCA
SCARB2*	dd_Smed_v4_2304_0_1	2.71 (-0.40 , 6.22)	1.75	3.53476e-05	gut	scavenger receptor class B, member 2 (SCARB2)	uc003hju.2	2e-94,	CD36,	PF01130.16,	1.1e-138,		ATGGCAAAATACCACTGTGCC	TTTTTCGATGTCTTGAATCCTGC	GTTTTGGAACGCCGAGGG
dd_8528	dd_Smed_v4_8528_0_1	3.25 (-0.51 , 6.11)	1.71	3.53476e-05	unclear pattern	NA	NA	NA	HSP20,	PF00011.16,	1.6e-05,		TGACTGTTTCTTGTTGATGCGAC	GCCAAATTCTTTTGCGATCAACC	GCGGTAGCGTTTTTCAAATCA
dd_9847	dd_Smed_v4_9847_0_1	3.18 (-0.51 , 6.18)	1.7	3.53476e-05	no signal	NA	NA	NA	NA	NA	NA		GGAAGTTGATGAAAAAGACGACA	CACCAATCAAATCTTTACCAGCA	AACAACAAGCAACACAACGT
NAPG*	dd_Smed_v4_4864_1_1	2.08 (-0.73 , 5.48)	1.48	3.53476e-05	epidermis	N-ethylmaleimide-sensitive factor attachment protein, gamma (NAPG)	uc002kon.3	1e-37,	NA	NA	NA		TGTCTAAGATAAGTGAAGCGGAA	TCTGTTGATAATGAAGGGGCGA	ACCAATAATTGCAAATCCAACCA
dd_32201	dd_Smed_v4_32201_0_1	3.18 (-1.13 , 6.07)	1.44	3.53476e-05	unclear pattern	NA	NA	NA	NA	NA	NA		AAAAGTGGCCGGAGCGAA	AGGGAAGAGCAACAATTCAGT	GGTAACTAGCGCCTGGGC
FYN*	dd_Smed_v4_11561_0_1	3.18 (-1.21 , 5.92)	1.43	3.53476e-05	CNS	FYN oncogene related to SRC, FGR, YES (FYN)	uc003pvk.3	0,	Pkinase_Tyr, Pkinase, SH2, SH3_1, SH3_2,	PF07714.12, PF00069.20, PF00017.19, PF00018.23, PF07653.12,	8.3e-95, 9.4e-51, 4.8e-24, 2.1e-14, 1.1e-10,		TGGGCAACTGCATTGGGA	CAACGAAAATCCCTCTAGCTCC	TCAAAGCTGCTTCGGGGG
dd_19858	dd_Smed_v4_19858_0_1	2.85 (-1.72 , 5.78)	1.38	3.53476e-05	no signal	NA	uc001rjw.1	3e-126,	DEAD_2, Helicase_C_2, Helicase_C_2,	PF06733.10, PF13307.1, PF13307.1,	3.9e-44, 1.8e-06, 8.4e-40,		AAATCCGGTGGCTGTCCG	AGCTCATTTAGTGTTGATGCCA	TGACCGGTTTCATGGCAAGA
Smed-FoxD	dd_Smed_v4_23249_0_1	2.67 (-3.14 , 6.73)	1.31	3.53476e-05	anterior pole	NA	uc003zfz.3	2e-53,	Fork_head,	PF00250.13,	1.1e-41,	Scimone, 2014	NA	NA	NA
ZBED5*	dd_Smed_v4_22978_0_1	2.08 (-1.17 , 5.15)	1.3	3.53476e-05	CNS	zinc finger, BED-type containing 5 (ZBED5)	uc021qdu.1	4e-84,	NA	NA	NA		TCGAACAGCGCTGTGTCA	GCGGATAGAAGAACTTTTGCTCT	TTTGGCCAAGGCACCCTT
NKX1-2*	dd_Smed_v4_19327_0_1	1.65 (-0.95 , 4.39)	1.25	3.53476e-05	unclear pattern	NK1 homeobox 2 (NKX1-2)	uc010quf.2	3e-34,	Homeobox,	PF00046.24,	2.5e-21,		TCCGAAACTTTGAAAGAATGGGT	ATTCCAAGTCAAACGATAAGCCT	TTCCGTTGGTATTTCTTTAACGG
PCGF2*	dd_Smed_v4_12753_0_1	1.24 (-1.75 , 3.66)	0.84	3.53476e-05	pharynx	polycomb group ring finger 2 (PCGF2)	uc002hqp.1	2e-48,	zf-C3HC4_2, zf-C3HC4, zf-RING_2,	PF13923.1, PF00097.20, PF13639.1,	1.1e-07, 1.4e-07, 2.4e-06,		ACCGTTATTGAATGTATGCACTC	ACCTGTATCATGAAGCATTTGGA	TCATGGACTTTGACACGTTTGT
dd_5190	dd_Smed_v4_5190_0_1	0.80 (-1.50 , 3.00)	0.69	3.53476e-05	unclear pattern	NA	NA	NA	NA	NA	NA		TGTCGACGGTGGTGCATC	TCATCGGGATCTCAATATGGTGA	GGCGAACGGGAGTCTGAG
dd_4374	dd_Smed_v4_4374_0_1	0.91 (-1.75 , 3.29)	0.66	3.53476e-05	CNS	NA	uc010vlm.1	0,	HECT, WW, C2,	PF00632.20, PF00397.21, PF00168.25,	6.1e-90, 1.4e-23, 1.6e-08,		CGTAGCTGGATGAAACCAAGC	GTGTAAGACAGCTAAGAGTTCGA	CGTCCCCAACCCGTTCAA
Post-pharyngeal
		SCDE				Human best BLASTx			PFAM
Name	Contig	Log2 expression ratio	Z-score	cZ	ISH pattern	Description	id	E-val	Description	id	E-val	Notes	5' outer primer	5' inner primer	3' primer
dd_13065	dd_Smed_v4_13065_0_1	-6.76 (-9.29 , -3.55)	-4.6	-2.35722	AP gradient	NA	NA	,NA,	Death,	PF00531.17,	1.8e-11,		TGATTTGCCTCCGACAAACG	TGGGATCAACATTACGGACTGG	TGTTTTGGATCCTTACCTCTCTT
Smed-lox5a	dd_Smed_v4_16227_0_1	-5.85 (-9.07 , -3.07)	-4.35	-1.96444	AP gradient	homeobox B7 (HOXB7)	uc002inv.3	8e-23,	Homeobox,	PF00046.24,	2.4e-11,	Currie, 2016	AAAGCACACCTCTCCGGC	CCGGCAATACTTGTTAATGATGT	CGTCGACGTCTTGTGAGGT
dd_4427	dd_Smed_v4_4427_0_1	-5.59 (-8.15 , -2.45)	-3.79	-0.707252	AP gradient	NA	NA	NA	NA	NA	NA		TCTGAGCGGCAAACTTGAA	GCGAATGTCTATTGGATAGCACG	ACGTTGATCACATTCTTGCTGT
Smed-axin2	dd_Smed_v4_5531_0_1	-3.88 (-7.64 , -1.50)	-3.16	-3.53476e-05	AP gradient	axin 2 (AXIN2)	uc002jfj.1	2e-15,	RGS,	PF00615.14,	6.4e-18,	Iglesias, 2011	NA	NA	NA
Smed-ptk7	dd_Smed_v4_6999_0_1	-3.73 (-7.17 , -1.43)	-3.16	-3.53476e-05	midbody gradient	NA	uc003oue.1	7e-52,	Pkinase_Tyr, I-set, Ig_2, Pkinase, V-set, Ig_3, ig,	PF07714.12, PF07679.11, PF13895.1, PF00069.20, PF07686.12, PF13927.1, PF00047.20,	1.8e-64, 2.9e-53, 2.7e-38, 1.9e-33, 5.4e-33, 4.5e-30, 3.8e-18,		CCAGTTGGTACCCGCGTT	TCACTTTGGATTTTATCACTGCC	CGGATCACCTCCAGCGAC
CTNNB1*	dd_Smed_v4_9667_0_1	-4.90 (-7.46 , -1.65)	-3.11	-3.53476e-05	AP gradient, CNS	catenin (cadherin-associated protein), beta 1, 88kDa (CTNNB1)	uc011azg.1	2e-14,	NA	NA	NA		TGCTCTATTGGGTGAGCGG	GAACCCCATTCGGATGTGAGA	TCGTCATTGGAATGTCGGTCT
sp5*	dd_Smed_v4_7824_0_1	-4.94 (-7.53 , -1.57)	-2.97	-3.53476e-05	AP gradient	Sp3 transcription factor (SP3)	uc002uif.3	2e-45,	zf-H2C2_2, zf-C2H2, zf-C2H2_4,	PF13465.1, PF00096.21, PF13894.1,	2.7e-12, 8.7e-12, 5.2e-09,	Reuter, 2015	NA	NA	NA
Smed-Post-2c	dd_Smed_v4_12467_0_1	-4.75 (-7.28 , -1.43)	-2.94	-3.53476e-05	AP gradient	homeobox C12 (HOXC12)	uc010soq.2	1e-15,	Homeobox,	PF00046.24,	1.3e-20,	Currie, 2016	AAACACACTTCGATGAGTTGGAC	GCGTGATTGTGCATGCGT	TTGGGTTTGCTGTAATTGGCA
PAPD5*	dd_Smed_v4_10037_0_1	-5.12 (-7.82 , -1.57)	-2.94	-3.53476e-05	unclear pattern	PAP associated domain containing 5 (PAPD5)	uc002efz.3	2e-09,	PAP_assoc,	PF03828.14,	6.9e-07,		TGGCAGTGTGTTTTATTCGTAGA	TGTTTGCCAGTTTATCAAGTTCG	AATTGCAGAATTTCCAGAGTCCC
DDX41*	dd_Smed_v4_7181_0_1	-4.75 (-7.31 , -1.43)	-2.91	-3.53476e-05	CNS, dotty	DEAD (Asp-Glu-Ala-Asp) box polypeptide 41 (DDX41)	uc003mho.3	0,	DEAD, Helicase_C, ResIII,	PF00270.24, PF00271.26, PF04851.10,	2.4e-42, 3.4e-30, 2.6e-05,		AGTTGGACACCTCCATCGT	GCTGAAGGAGAAAATATACCGCC	GCGACTCTTTCCGGCCAA
dd_53369	dd_Smed_v4_53369_0_1	-4.50 (-9.51 , -1.24)	-2.84	-3.53476e-05	unclear pattern	NA	NA	NA	NA	NA	NA		CTTGGTGTTACTGCGAAGGG	GACGGAGAAGGCTATGTTGG	TCGGTTTGGGGTACGATTTG
dd_12494	dd_Smed_v4_12494_0_1	-3.55 (-6.95 , -1.10)	-2.82	-3.53476e-05	no PCR	NA	NA	NA	7tm_1,	PF00001.16,	3.1e-17,		GGTTGATTTGCTCCTCAGTCC	TGAAAATGCAATTTCTGTCGTCG	GCTGCTAAGCTACGGCAA
dd_9287	dd_Smed_v4_9287_0_1	-3.07 (-6.18 , -0.95)	-2.8	-3.53476e-05	epidermis	NA	NA	NA	zf-C2H2_2,	PF12756.2,	8.6e-06,		ACTGTTCTCATTGGGCGGT	TTATCGCTGTCAAAGTTGTGTCG	TACCCCGCAACGAAACCC
Smed-fz4-1	dd_Smed_v4_11650_0_1	-3.66 (-8.63 , -1.02)	-2.73	-3.53476e-05	AP gradient	frizzled family receptor 10 (FZD10)	uc001uii.3	6e-114,	Frizzled, Fz,	PF01534.12, PF01392.17,	1.6e-90, 2.4e-27,	Gurley, 2008	NA	NA	NA
Smed-wntless	dd_Smed_v4_14391_0_1	-4.50 (-9.51 , -1.24)	-2.71	-3.53476e-05	AP gradient, mouth	wingless-type MMTV integration site family, member 11 (WNT11)	uc001oxe.3	1e-32,	wnt,	PF00110.14,	6.6e-65,	Adell, 2009	NA	NA	NA
NSUN2*	dd_Smed_v4_6183_0_1	-4.17 (-7.13 , -1.10)	-2.71	-3.53476e-05	unclear pattern	NOP2/Sun RNA methyltransferase family, member 2 (NSUN2)	uc003jdu.3	5e-171,	Nol1_Nop2_Fmu,	PF01189.12,	5e-29,		GCGTTGTATCAGGCCCCT	TCCAGATGAAATGGCTTGGCA	CGGAATTCGCCTCCACCA
MBOAT7*	dd_Smed_v4_7223_0_1	-3.25 (-7.13 , -0.91)	-2.69	-3.53476e-05	unclear pattern	membrane bound O-acyltransferase domain containing 7 (MBOAT7)	uc002qdr.3	2e-67,	MBOAT,	PF03062.14,	6.5e-45,		CACAATGACTTGGGATGATTTCA	AGCGGTACTGCGGTTTGG	ACCGAGCGACGAAACTGG
Smed-hox4b	dd_Smed_v4_2442_0_1	-3.14 (-6.54 , -0.84)	-2.69	-3.53476e-05	AP gradient	homeobox C6 (HOXC6)	uc001ses.3	1e-30,	Homeobox,	PF00046.24,	1.5e-20,	Iglesias, 2008 (HoxD); Currie, 2016	NA	NA	NA
dd_33146	dd_Smed_v4_33146_0_1	-4.35 (-8.52 , -1.13)	-2.68	-3.53476e-05	no signal	NA	NA	NA	NA	NA	NA		CCGCCAAAACAGCTTCGG	AGGTTAAGCCTCACGGTTCA	CGAGAGGACCGGAGTGGA
dd_13735	dd_Smed_v4_13735_0_1	-3.25 (-6.03 , -0.88)	-2.66	-3.53476e-05	AP gradient, CNS	NA	NA	NA	NA	NA	NA		TGAAGTCGATTCACTCACCGT	TCCACAAATCCTAGACGGCA	AGAGAGAGAGAGAGAGAGAGAGA
LINGO4*	dd_Smed_v4_16092_0_1	-4.42 (-7.17 , -1.10)	-2.64	-3.53476e-05	CNS	leucine rich repeat and Ig domain containing 4 (LINGO4)	uc021oyu.1	2e-10,	LRR_8, I-set, LRR_4, Ig_2, LRR_1,	PF13855.1, PF07679.11, PF12799.2, PF13895.1, PF00560.28,	3e-15, 1.7e-07, 1.5e-07, 7.2e-06, 9.9e-06,		TGCCGAAAAACGCAAGCA	TGCAGTAGACTCGAAACCAAA	ACCAAAGCAGGAGAGGAAGG
GK*	dd_Smed_v4_10169_0_1	-4.39 (-6.98 , -1.02)	-2.64	-3.53476e-05	epidermis	glycerol kinase (GK)	uc004dch.4	2e-65,	FGGY_N, FGGY_C,	PF00370.16, PF02782.11,	1.2e-39, 3e-25,		TGCTGTCGTGGTTTGGAGT	AGCAGAAGATGATTGTAGATGCA	CGAGAGAAATTTCCAGCCCCA
UCHL5*	dd_Smed_v4_1672_0_1	-4.35 (-6.95 , -0.99)	-2.62	-3.53476e-05	unclear pattern	ubiquitin carboxyl-terminal hydrolase L5 (UCHL5)	uc001gsm.3	3e-97,	Peptidase_C12,	PF01088.16,	5.6e-59,		CCGTAAAGGCTAACTATCCGGA	AATGGCTGGCGGTAGAGC	GGCTACATCCATTTTGCTACGG
dd_1672	dd_Smed_v4_15686_0_1	-4.39 (-6.98 , -0.99)	-2.58	-3.53476e-05	AP gradient, CNS	NA	NA	NA	NA	NA	NA		TCAACGGGGTCATCAACGA	TGAAGAGCCGACAAATGACA	TCGCAGGAAATTCAGCACT
PCDH1*	dd_Smed_v4_13412_0_1	-4.46 (-7.20 , -0.84)	-2.42	-3.53476e-05	epidermis	protocadherin 1 (PCDH1)	uc011dbf.2	1e-60,	Cadherin, Cadherin_2,	PF00028.12, PF08266.7,	1.2e-58, 1.6e-12,		CGTTGCCCGTTGCTCAAG	GGACAGTTATAAGTACGGAGTGA	TTGCGCCATCGAAGCTCA
dd_13372	dd_Smed_v4_13372_0_1	-4.20 (-6.84 , -0.69)	-2.38	-3.53476e-05	unclear pattern	NA	NA	NA	7tm_1, 7TM_GPCR_Srw,	PF00001.16, PF10324.4,	2.2e-20, 5.2e-05,		AAAAGATGCCCAGCAACGA	TGGTATTGTAGGAGGCATTGGG	CCTCCCAAAACTTTTGAGTTCCA
CASP8*	dd_Smed_v4_10883_0_1	-4.02 (-6.62 , -0.62)	-2.35	-3.53476e-05	epidermis	caspase 8, apoptosis-related cysteine peptidase (CASP8)C	uc002uxw.1	1e-35,	Peptidase_C14,	PF00656.17,	2.9e-32,		TGACAGTGGAAGGAGAATCCA	CGAATGCTCGGTACCCATTG	GCATTTGCACTGATATCGGCA
Smed-fz4-3	dd_Smed_v4_13356_0_1	-2.78 (-6.11 , -0.40)	-2.27	-3.53476e-05	AP gradient	frizzled family receptor 4 (FZD4)	uc001pce.3	6e-97,	Frizzled, Fz,	PF01534.12, PF01392.17,	1.2e-69, 4e-22,		TATCGCGGCCAATGCAGA	TGCGAAACGGTGAAAAGTACG	AGCCGATTGTCAATGGAGGA
Smed-sFRP-2	dd_Smed_v4_8832_0_1	-3.88 (-6.62 , -0.44)	-2.23	-3.53476e-05	AP gradient	secreted frizzled-related protein 5 (SFRP5)	uc001kor.4	5e-34,	Fz,	PF01392.17,	9.5e-29,	Gurley, 2010	NA	NA	NA
dd_15468	dd_Smed_v4_15468_0_1	-4.06 (-6.84 , -0.37)	-2.14	-3.53476e-05	unclear pattern	NA	NA	NA	7TM_GPCR_Srw, 7tm_1, 7TM_GPCR_Srx,	PF10324.4, PF00001.16, PF10328.4,	1.6e-39, 1.5e-15, 2e-05,		CTGAAAACCATCTGCCAGTCA	AGGTGAATATCCCGGAAGCA	GCTGGGAGTCGTTGAAGTCA
ORF2-like*	dd_Smed_v4_18000_0_1	-3.84 (-6.58 , -0.29)	-2.12	-3.53476e-05	AP gradient, CNS	ORF2-like protein	uc003qit.1	2e-18,	RVT_1,	PF00078.22,	2.5e-33,		CTGCGAGGTTGGGCGTTA	ACAACCTTGAATGTGATAGGGA	CAAGCGATTGCCAACGGG
dd_4833	dd_Smed_v4_4833_0_1	-3.66 (-6.25 , -0.26)	-2.11	-3.53476e-05	unclear pattern	NA	NA	NA	Methyltransf_22,	PF13383.1,	9.3e-14,		TGAACATTTGTCATTCGTCTGGA	AGCTTCGATTCAATTATTGGCGA	GACAATTCCGACTAAAATCGACA
dd_2992	dd_Smed_v4_2992_0_1	-3.07 (-6.54 , -0.18)	-2.07	-3.53476e-05	gut	NA	uc001wqm.1	1e-172,	Sec1,	PF00995.18,	4.9e-130,		TGGCGCTAAATCTCAGACGT	TTGCGATAAACACGGTCTAGA	CGTGACGAACTGCAGCCA
HBS1L*	dd_Smed_v4_9327_0_1	-3.69 (-6.54 , -0.15)	-2.03	-3.53476e-05	no signal	HBS1-like (S. cerevisiae) (HBS1L)	uc011ecz.1	2e-134,	GTP_EFTU, GTP_EFTU_D3, DUF1916, MMR_HSR1, Miro,	PF00009.22, PF03143.12, PF08938.5, PF01926.18, PF08477.8,	2.4e-47, 1.2e-15, 2.5e-07, 2.3e-05, 5.2e-05,		GCAGCTGTCGGTTTGTGC	AGACATCGTGATTTTAAAGGCAA	TCGAACGCGTGTGGAACT
ARFIP1*	dd_Smed_v4_5732_0_1	-2.67 (-6.14 , -0.07)	-2	-3.53476e-05	boundary, ventral dots	ADP-ribosylation factor interacting protein 1 (ARFIP1)	uc003ina.3	7e-70,	Arfaptin,	PF06456.8,	2e-51,		TGCGTAGTGAATGAAGACAGAGA	TTCATTTTCACTGCCACTTGG	AGCCACATACCCATCACTTCA
Smed-wntA	dd_Smed_v4_4877_0_1	-2.23 (-4.79 , -0.04)	-1.99	-3.53476e-05	AP gradient, CNS	protein kinase, AMP-activated, gamma 1 non-catalytic subunit (PRKAG1)	uc001rsy.3	1e-89,	wnt, CBS,	PF00110.14, PF00571.23,	1.4e-104, 9.5e-30,	Adell, 2009	NA	NA	NA
PRMT5*	dd_Smed_v4_8688_0_1	-3.44 (-6.11 , -0.04)	-1.96	-3.53476e-05	unclear pattern	protein arginine methyltransferase 5 (PRMT5)	uc001whm.1	4e-158,	PRMT5,	PF05185.11,	8.6e-143,		ACCGATATCGTGGTGGCG	TGTTGATGTTAGCTTTGCCCA	GAGCGGCCATTCGGGTTA
RBBP6*	dd_Smed_v4_12318_0_1	-3.66 (-6.43 , 0.00)	-1.94	-3.53476e-05	unclear pattern	retinoblastoma binding protein 6 (RBBP6)	uc010bxr.3	5e-36,	DWNN,	PF08783.6,	6.5e-14,		AGAAGAGCGAGCTTGTTCTGA	AACGATTGCCTTTAACTGATCAA	CCTCCCGGCTAGGATGGA
dd_8788	dd_Smed_v4_8788_0_1	-3.44 (-6.18 , 0.04)	-1.93	-3.53476e-05	no signal	NA	NA	NA	NA	NA	NA		TGGCTGAAAGTTCATTGACAAGT	ATGCAACATGATTTTGAAGCCA	TGATCTTTGAGTCCTGCTCCA
TFAP4*	dd_Smed_v4_8205_0_1	-3.29 (-5.92 , 0.07)	-1.9	-3.53476e-05	CNS	transcription factor AP-4 (activating enhancer binding protein 4) (TFAP4)	uc010uxg.2	3e-16,	HLH,	PF00010.21,	6.5e-16,		TGTCTTTTATTGTTGTCACTCGG	ACGGCATGCCTTTACGGA	TGGATTGCTTTTTGATATCGGCG
ANK3*	dd_Smed_v4_7379_0_1	-3.40 (-6.14 , 0.15)	-1.87	-3.53476e-05	unclear pattern	ankyrin 3, node of Ranvier (ankyrin G) (ANK3)	uc001jlc.1	4e-43,	Ank_2, Ank,	PF12796.2, PF00023.25,	6.1e-98, 6.8e-63,		TCCATTACGCCTGCCAGC	CGGCTGTTGGTTTCAGGGA	TTCGAGCCGTGGTCAACC
ZFN226*	dd_Smed_v4_5058_0_1	-2.05 (-4.79 , 0.15)	-1.81	-3.53476e-05	CNS	zinc finger protein 226 (ZNF226)	uc002oyt.3	1e-35,	zf-H2C2_2, zf-C2H2_4, zf-C2H2,	PF13465.1, PF13894.1, PF00096.21,	1.1e-13, 2.2e-13, 3.5e-13,		GTACGTGTCAGCGTCGCT	GCAAACGGCAAGAACAGATCG	CCACACAGCCCTCGTGTT
CASD1*	dd_Smed_v4_5020_0_1	-2.27 (-6.00 , 0.44)	-1.65	-3.53476e-05	CNS	CAS1 domain containing 1 (CASD1)	uc003uni.4	3e-139,	Cas1_AcylT,	PF07779.7,	2.2e-169,		ACGTGTTGCAGCAAAGGTG	GGTCCATAATCGCTTTGTATTGC	CAAACCGCGCCAAGTGTC
WARS2*	dd_Smed_v4_6466_0_1	-2.30 (-5.67 , 0.58)	-1.55	-3.53476e-05	parenchyma	tryptophanyl tRNA synthetase 2, mitochondrial (WARS2)	uc001ehn.3	3e-67,	tRNA-synt_1b,	PF00579.20,	1.2e-54,		ACCAATGTTGCTTGCAAAAGA	TGTCTGGAATTCAGCCTACAGG	ACCGGATAACTATCAAGCGCA
TRIM9*	dd_Smed_v4_12595_0_1	-3.03 (-5.81 , 0.80)	-1.54	-3.53476e-05	CNS	tripartite motif containing 9 (TRIM9)	uc001wyx.4	1e-123,	SPRY, zf-B_box,	PF00622.23, PF00643.19,	6e-12, 7.5e-10,		TGCCGCCAGTGCATAACA	GAGCACAGTCGACATTTGACA	CTGCTGTCGTCGGTTGGT
NOL6*	dd_Smed_v4_9162_0_1	-2.67 (-5.74 , 0.73)	-1.52	-3.53476e-05	unclear pattern	nucleolar protein 6 (RNA-associated) (NOL6)alpha	uc011lob.2	4e-18,	Nrap,	PF03813.9,	3.2e-51,		TGCGTCCAATAGGCGGTT	TAAAGTCTATTCCGTTGCCCTT	CCCTCGGTAGCGATGCAT
AGK*	dd_Smed_v4_8572_0_1	-1.79 (-5.19 , 0.77)	-1.38	-3.53476e-05	unclear pattern	acylglycerol kinase (AGK)	uc003vwi.2	3e-42,	DAGK_cat,	PF00781.19,	1.6e-17,		GTGGTTTAATTGCATACGGTGGT	CGAAGACAATTTTGTGCTGAAGC	TCAGTTGATTTGGTTTCGGGA
SPOP*	dd_Smed_v4_10149_0_1	-2.56 (-5.37 , 1.13)	-1.31	-3.53476e-05	CNS	speckle-type POZ protein (SPOP)	uc002ipg.3	3e-99,	MATH,	PF00917.21,	2.4e-11,		ACCTTAATGGAAGCTAATCGTCA	ACTGAGGGGGTTTCAGCC	TGTGTTGGTAATTGTTTCCGTGA
PCDH9*	dd_Smed_v4_14613_0_1	-2.49 (-5.48 , 1.32)	-1.27	-3.53476e-05	CNS	protocadherin 9 (PCDH9)	uc001vin.3	9e-71,	Cadherin,	PF00028.12,	3.7e-61,		GGAAACCCCAAAGATCCGC	TGACAATTTCCCTCAAATCACTG	TGCTGTTGGACTCGAGGC
dd_13863	dd_Smed_v4_13863_0_1	-2.34 (-5.26 , 1.57)	-1.14	-3.53476e-05	unclear pattern	NA	NA	NA	DDE_3, HTH_29,	PF13358.1, PF13551.1,	1.3e-14, 1.6e-06,		ACGTATACACACACTTAAGGCA	TGCGATTTGGTGTACAGGAGT	AGCTCTTTGTTGATAGCATCGT
dd_9457	dd_Smed_v4_9457_0_1	-1.83 (-4.94 , 1.35)	-1.1	-3.53476e-05	CNS	NA	NA	NA	NA	NA	NA		GCAGCAGCAACAACAACAAC	ACAACACCACCCTCAGTCA	AGAGCCTTTTGATTCGTACCCA
TLX3*	dd_Smed_v4_13781_0_1	-2.60 (-5.56 , 2.41)	-1.08	-3.53476e-05	unclear pattern	T-cell leukemia homeobox 3 (TLX3)	uc003mbf.3	4e-39,	Homeobox,	PF00046.24,	1.6e-21,		TGGCCAATCGAAACCGTT	GTGCTTGTTCTTGATCCTGTCA	ACCCCCTGGAGAAGACGT
ANKRD17*	dd_Smed_v4_4509_0_1	-1.54 (-4.94 , 1.61)	-0.96	-3.53476e-05	CNS	ankyrin repeat domain 17 (ANKRD17)	uc011cbd.1	3e-10,	Ank_2, Ank, Ank_4, Ank_5, Ank_3, SAM_2, SAM_1,	PF12796.2, PF00023.25, PF13637.1, PF13857.1, PF13606.1, PF07647.12, PF00536.25,	3.6e-32, 4.3e-26, 8.4e-22, 6.5e-20, 1.5e-19, 4.1e-06, 1.5e-05,		TGAGCCAACGATTGATAGCA	AAGAAGAGTATGAAGGGATTGCA	GGCACGGCAAGTCCTCAT
EDEM2*	dd_Smed_v4_7363_0_1	-0.99 (-3.47 , 1.32)	-0.85	-3.53476e-05	unclear pattern	ER degradation enhancer, mannosidase alpha-like 2 (EDEM2)	uc002xbo.2	0,	Glyco_hydro_47,	PF01532.15,	2e-137,		CATTGACATGCAGCGGGC	TGGGGAAGTTTTTCATTATCGCT	CCATTTCAGGCAGCCCGA
UBE2D1*	dd_Smed_v4_6773_0_1	-0.77 (-3.98 , 1.75)	-0.6	-3.53476e-05	unclear pattern	ubiquitin-conjugating enzyme E2D 1 (UBE2D1)	uc001jke.2	7e-29,	UQ_con, F-box,	PF00179.21, PF00646.28,	8.1e-38, 4.3e-07,		GGAGAATCTTGATGAAACAAGCG	TGAAACCAAAAATTGTCCGCA	AGCGTGCAAAAGAATAAATGTGA

## Sheet: Supplementary File 1E
Supplementary File 1E. Pre-pharyngeal (regions 2-4) versus post-pharyngeal (region 10) SCDE analysis and ISH results
All genes with p<0.005 (|Z|>2.58) in this SCDE analysis are shown above double line, with non-significant genes screened by ISH listed below double line.
* indicates name is human best BLASTx hit; SCDE log2 expression ratio calculated as maximum likelihood estimate (lower bound, upper bound); cZ is Z score corrected for multiple hypothesis using Holm procedure
Pre-pharyngeal
		SCDE				Human best BLASTx			PFAM
Name	Contig	Log2 expression ratio	Z-score	cZ	ISH pattern	Description	id	E-val	Description	id	E-val	Notes	5' outer primer	5' inner primer	3' primer
Smed-ndl-3	dd_Smed_v4_6604_0_1	3.77 (1.21 , 7.97)	2.9296	0.0133264	AP gradient	NA	NA	NA	Ig_2, ig,	PF13895.1, PF00047.20,	2.7e-10, 8.7e-05,	Rink, 2009	NA	NA	NA
ALDH6A1*	dd_Smed_v4_2050_0_1	5.34 (1.65 , 7.93)	2.89085	0.0133264	no PCR	aldehyde dehydrogenase 6 family, member A1 (ALDH6A1)	uc001xpo.3	0,	Aldedh,	PF00171.17,	1.2e-128,		CGAGTGCATGCCTTGTCC	TGTTCATCAATGGGGATTTCGT	TCCTCACGCCACAGTTGC
AURKC*	dd_Smed_v4_10323_0_1	5.12 (1.35 , 7.46)	2.80802	0.0133264	no PCR	aurora kinase C (AURKC)	uc002qoe.3	2e-74,	Pkinase, Pkinase_Tyr,	PF00069.20, PF07714.12,	3.9e-43, 1.1e-29,		CCAGACGTTGTTTCTAAAAGTGA	ATGTCGGTATGCCACTGGG	AGCACCCCCACTTTTATCCAG
dd_5401	dd_Smed_v4_5401_0_1	5.05 (1.35 , 7.46)	2.79927	0.0133264	unclear pattern	NA	NA	NA	Glyco_transf_92,	PF01697.22,	3.9e-46,		TCGGACAAGAAACAGTTACAGA	TTCTGCCCGCCGGTACAT	ACTGACAAACATTTCAGCAGAAT
Smed-ndl-2	dd_Smed_v4_8340_0_1	5.30 (1.46 , 7.75)	2.77577	0.0133264	AP gradient	fibroblast growth factor receptor 3 (FGFR3)	uc003gdq.3	5e-9,	I-set, Ig_3, Ig_2, V-set, ig,	PF07679.11, PF13927.1, PF13895.1, PF07686.12, PF00047.20,	4.1e-17, 2.7e-14, 4.1e-14, 1.8e-12, 3.8e-09,		GATGCAGTCTGACCCGCA	TGCAACAGGAAGGAAAGTTACTG	ACCCTGTTGAACCAAGCCA
dd_18038	dd_Smed_v4_18038_0_1	3.95 (1.06 , 7.60)	2.72404	0.0133264	unclear pattern	NA	NA	NA	NA	NA	NA		CGTCTGCCACCCACAGAT	TCACAGTAAAGCGGGAGTTTGA	AGACCCACTAAGTCACTATCGT
PRMT7*	dd_Smed_v4_8814_0_1	5.05 (1.21 , 7.46)	2.64642	0.0133264	CNS	protein arginine methyltransferase 7 (PRMT7)	uc002evy.2	8e-89,	PrmA, Methyltransf_18, MTS,	PF06325.8, PF12847.2, PF05175.9,	9.4e-09, 2.8e-06, 1.1e-05,		TCGTACTTCTGGATACGCAGA	TGCCCTGAAACAAGTTATACGAC	TGTCCTTTACCGGGGTGT
CPT2*	dd_Smed_v4_5773_0_1	4.83 (1.02 , 7.31)	2.5542	0.0133264	unclear pattern	carnitine palmitoyltransferase 2 (CPT2)	uc001cvb.4	2e-156,	Carn_acyltransf,	PF00755.15,	7.9e-149,		ACCAGTTGTTTTGACCCACA	AATTCCAAAAAGTGCACCAGTCA	TGCTTTGGCCGGAACAGT
dd_11412	dd_Smed_v4_11412_0_1	5.01 (1.06 , 7.38)	2.48961	0.0133264	unclear pattern	NA	NA	NA	V-ATPase_H_N,	PF03224.9,	0.00022,		TGACTGCAAAACCCACAGA	TGCTGTTAAAACGTTGAAACAGT	GCTGTCCTGGAGAGACCG
PDE12*	dd_Smed_v4_14281_0_1	4.50 (0.80 , 7.31)	2.43315	0.0133264	no signal	phosphodiesterase 12 (PDE12)	uc003diw.4	6e-39,	Exo_endo_phos,	PF03372.18,	1.2e-08,		AGCTTCCTTCGTCCAATTGA	CCATCCTATGGCTAACAATTGTG	TGTTGGGAAGTGCGATGTT
CARM1*	dd_Smed_v4_6133_0_1	4.57 (0.66 , 6.98)	2.3258	0.0133264	unclear pattern	coactivator-associated arginine methyltransferase 1 (CARM1)	uc002mpz.3	4e-150,	PRMT5, Methyltransf_31, Methyltransf_18, Methyltransf_26, PrmA, MTS,	PF05185.11, PF13847.1, PF12847.2, PF13659.1, PF06325.8, PF05175.9,	8.6e-17, 5e-09, 1.1e-08, 5.1e-08, 4.3e-08, 9.6e-06,		AGGTATGGCCTCGTGTTTTGA	TGCTGCGATATAATGAAATCGCA	GAGGCTGTTGAACCGGCT
TDRD3*	dd_Smed_v4_4383_0_1	3.33 (0.48 , 6.95)	2.28363	0.0133264	no signal	tudor domain containing 3 (TDRD3)	uc010aeg.3	9e-21,	DUF1767, UBA,	PF08585.7, PF00627.26,	1.1e-06, 3.4e-05,		TCGATGCCTTACAGTTCTGACA	AAGCACTATGGGGAATCGTGG	GATTACCTCGGCCTCGGC
Smed-fz4-4	dd_Smed_v4_7210_0_1	2.92 (0.37 , 6.32)	2.25478	0.0133264	AP gradient	frizzled family receptor 4 (FZD4)	uc001pce.3	9e-147,	Frizzled, Fz,	PF01534.12, PF01392.17,	3.7e-107, 3.1e-27,		GCGTTCCAAAATGTTCGGCT	TTTGGTTAACTGTTCTTGCAAGC	CGCACACACGCACACTTAC
RFC3*	dd_Smed_v4_9695_0_1	3.77 (0.44 , 6.80)	2.24496	0.0133264	no signal	replication factor C (activator 1) 3, 38kDa (RFC3)	uc001uuz.3	2e-145,	Rep_fac_C, DNA_pol3_delta2, AAA, Rad17,	PF08542.6, PF13177.1, PF00004.24, PF03215.10,	4e-18, 2.5e-12, 6.8e-05, 6.8e-05,		TGAGTCTTTGGGCTGATAAGCA	ACCTTTGACTCTAAGCGAACTTG	GCAACGCTCTCTCTGCCT
IGSF10*	dd_Smed_v4_19460_0_1	4.53 (0.48 , 7.17)	2.17154	0.0133264	gut	immunoglobulin superfamily, member 10 (IGSF10)	uc011bod.2	7e-17,	LRR_8,	PF13855.1,	9.3e-19,		TGCAACGATCCGAGCACA	TCCGACTAGAGATGATGTACCA	ACGATAAACCCGTCGGTGG
dd_2749	dd_Smed_v4_2749_0_1	2.78 (0.07 , 6.43)	2.02724	0.0133264	pharynx	NA	NA	NA	HLH,	PF00010.21,	5.8e-05,		CGTTGCAATGTGCCTTTAAACG	CGTTTCTGACTCTAACGATGAAG	TCAACCAACCTTTTTAAGCACAA
QRSL1*	dd_Smed_v4_12029_0_1	4.17 (0.07 , 6.87)	2.00343	0.0133264	no signal	glutaminyl-tRNA synthase (glutamine-hydrolyzing)-like 1 (QRSL1)	uc003prm.3	1e-113,	Amidase,	PF01425.16,	2.2e-111,		TGTGGAAGTAAAATGCTCCAGA	AAACTATTGAAAGCTGGCGC	TCGCGAATTTTACAATGGCGA
RASD1*	dd_Smed_v4_55123_0_1	3.84 (-0.07 , 6.43)	1.92369	0.0133264	unclear pattern	RAS, dexamethasone-induced 1 (RASD1)	uc002gri.3	6e-23,	Ras, Miro, Arf, SRPRB, GTP_EFTU,	PF00071.17, PF08477.8, PF00025.16, PF09439.5, PF00009.22,	3.6e-28, 8.9e-14, 7.9e-14, 3.2e-07, 4.7e-06,		CGAATGAATGACGAAAAGCCCA	TTCTGTTTCTCGGCGCCG	AGCGGAACAGAACACGAACT
CHRNA3*	dd_Smed_v4_12146_0_1	4.09 (-0.37 , 6.65)	1.81883	0.0133264	CNS	cholinergic receptor, nicotinic, alpha 3 (neuronal) (CHRNA3)	uc002beb.3	1e-82,	Neur_chan_LBD, Neur_chan_memb,	PF02931.18, PF02932.11,	8.4e-62, 2.4e-51,		GCCTGCAGATTTTGGCGG	TCAAAGTGACACGAGTATCCCC	CCTCAGCAGTAGGATCGAACA
LAMB1*	dd_Smed_v4_6093_0_1	2.71 (-0.40 , 6.47)	1.74587	0.0133264	gut	laminin, beta 1 (LAMB1)	uc003vev.2	0,	Laminin_EGF, Laminin_N,	PF00053.19, PF00055.12,	1.7e-99, 1.6e-58,		ACCGAGGATGCGACTCCT	TGCAAATCTTTTGTAACTGGCA	TCGAACCGCACCATTTCCA
IRF2BPL*	dd_Smed_v4_18245_0_1	4.64 (-0.88 , 7.02)	1.7158	0.0133264	unclear pattern	interferon regulatory factor 2 binding protein-like (IRF2BPL)	uc001xsy.3	2e-19,	IRF-2BP1_2,	PF11261.3,	3.2e-33,		ACCAGTCACGAAAGGTTGCA	AGTAATAGCAGTCGAAGTGGTCT	CTCACAGAACGCTGGGCA
TWIST2*	dd_Smed_v4_17951_0_1	4.06 (-1.17 , 6.51)	1.57954	0.0133264	unclear pattern	twist basic helix-loop-helix transcription factor 2 (TWIST2)	uc021vyw.1	3e-33,	HLH,	PF00010.21,	1.8e-16,		CGCGAGTAGTCTTTCAATCGG	TCAGCACAATCGTACGAAGAG	TTCGCCAAACTGAGAATGCG
NDUFS2*	dd_Smed_v4_3442_0_1	2.74 (-0.73 , 6.03)	1.55488	0.0133264	CNS, epidermis	NADH dehydrogenase (ubiquinone) Fe-S protein 2 (NDUFS2)	uc010pkj.2	0,	Complex1_49kDa,	PF00346.14,	6.3e-116,		GTATTACGCTGCAAGGTGGC	GCTCGACACCAGTCTCCC	CAAGATCTGCTAACATTAAGCCC
TMEME67*	dd_Smed_v4_7765_0_1	3.98 (-1.24 , 6.51)	1.54807	0.0133264	unclear pattern	transmembrane protein 67 (TMEM67)	uc011lgk.2	1e-144,	Meckelin,	PF09773.4,	1.2e-155,		CGGGTGTCAGAACCTGGC	AAGTATTGATGGAACCCCGTGT	GGCATCGGATGAAGGCGA
HEATR2*	dd_Smed_v4_9203_0_1	3.40 (-1.61 , 6.62)	1.4815	0.0133264	unclear pattern	HEAT repeat containing 2 (HEATR2)	uc010krz.1	2e-112,	HEAT, HEAT_2,	PF02985.17, PF13646.1,	9.5e-10, 5e-09,		GTCCAGAATCCTTCCGGCA	CGAGATTTATCAGACTGGTCGGA	CCCGGTTGCTGTCATCCA
HELZ2*	dd_Smed_v4_7048_0_1	2.52 (-1.06 , 6.25)	1.43601	0.0133264	epidermis	helicase with zinc finger 2, transcriptional coactivator (HELZ2)	uc002yfl.1	7e-92,	RNB, AAA_12, AAA_11, AAA_30, DUF2075,	PF00773.14, PF13087.1, PF13086.1, PF13604.1, PF09848.4,	8.4e-53, 8.7e-42, 1.8e-34, 1.9e-08, 0.00018,		TCCGTCGGAGGTGATCTGT	TGAGATGTAGGAAGGAAGATTGG	TGGCATCAGGAATCGCGT
PLCE1*	dd_Smed_v4_9716_1_1	2.34 (-1.06 , 5.59)	1.38583	0.0133264	CNS, nephridia	phospholipase C, epsilon 1 (PLCE1)	uc010qnx.2	4e-122,	PI-PLC-X, PI-PLC-Y, RA, RasGEF, FERM_M, C2, efhand_like,	PF00388.14, PF00387.14, PF00788.18, PF00617.14, PF00373.13, PF00168.25, PF09279.6,	4.5e-64, 3.7e-32, 1.7e-22, 5.3e-20, 2.4e-09, 1.4e-07, 1e-06,		AAAGACGATGCGGCCACA	ACAGATGCTGGGCCATCA	CCGACGCCGATTCTGGAA
KIRREL3*	dd_Smed_v4_11280_0_1	2.92 (-1.35 , 5.67)	1.31882	0.0133264	CNS, gut	kin of IRRE like 3 (Drosophila) (KIRREL3)	uc001qeb.3	2e-25,	Ig_2, I-set, Ig_3, ig, C2-set_2, V-set, C1-set,	PF13895.1, PF07679.11, PF13927.1, PF00047.20, PF08205.7, PF07686.12, PF07654.10,	3.9e-26, 2.8e-22, 1.2e-17, 1e-09, 2.3e-09, 1.9e-07, 0.00022,		CGACCCGGTGCTTCACTT	AACGGAAACTGGTTGAAATGCT	TGGCGTTCTCATGCTTGGT
RBM39*	dd_Smed_v4_1932_0_1	1.57 (-0.99 , 5.37)	1.24113	0.0133264	CNS	RNA binding motif protein 39 (RBM39)	uc010zvm.2	2e-83,	RRM_1, RRM_6, RRM_5,	PF00076.17, PF14259.1, PF13893.1,	2.1e-37, 3.8e-31, 8.2e-22,		TGGCAGTTGTCCTTGCGA	TCAGGTTGGAAAGATGGACGT	TCTCCGCAACGCACTGAC
FAM63A*	dd_Smed_v4_3191_0_1	2.12 (-2.23 , 5.05)	0.907256	0.0133264	unclear pattern	family with sequence similarity 63, member A (FAM63A)	uc010pcm.2	1e-51,	DUF544,	PF04424.8,	1.7e-25,		TGCAATCTGAAAATGGACCATGT	CTGGTGAAGACATGATTAACCGT	GCAGAGCCCTGGAATCACT
Tail
		SCDE				Human best BLASTx			PFAM
Name	Contig	Log2 expression ratio	Z-score	cZ	ISH pattern	Description	id	E-val	Description	id	E-val	Notes	5' outer primer	5' inner primer	3' primer
Smed-fz4-1	dd_Smed_v4_11650_0_1	-5.45 (-9.21, -3.11)	-5.00982	-2.51411	AP gradient	frizzled family receptor 10 (FZD10)	uc001uii.3	6e-114,	Frizzled, Fz,	PF01534.12, PF01392.17,	1.6e-90, 2.4e-27,	Gurley, 2008	NA	NA	NA
Smed-Post-2c	dd_Smed_v4_12467_0_1	-5.67 (-8.66, -2.38)	-3.6414	-0.0133264	AP gradient	homeobox C12 (HOXC12)	uc010soq.2	1e-15,	Homeobox,	PF00046.24,	1.3e-20,	Currie, 2016	AAACACACTTCGATGAGTTGGAC	GCGTGATTGTGCATGCGT	TTGGGTTTGCTGTAATTGGCA
Smed-lox5a	dd_Smed_v4_16227_0_1	-4.39 (-8.55, -2.01)	-3.57365	-0.0133264	AP gradient	homeobox B7 (HOXB7)	uc002inv.3	8e-23,	Homeobox,	PF00046.24,	2.4e-11,	Currie, 2016	AAAGCACACCTCTCCGGC	CCGGCAATACTTGTTAATGATGT	CGTCGACGTCTTGTGAGGT
PCHD1*	dd_Smed_v4_11633_0_1	-5.78 (-8.88, -2.41)	-3.39324	-0.0133264	CNS	protocadherin 1 (PCDH1)	uc011dbf.2	4e-92,	Cadherin, Cadherin_2,	PF00028.12, PF08266.7,	5.1e-89, 2.8e-11,		CACGACGCCGATCATGGA	ACGGCCAGGTGAAATGTGA	ACAGTTTGAGACGGCCGT
Smed-wnt11-2	dd_Smed_v4_16209_0_1	-5.41 (-8.48, -2.01)	-3.20308	-0.0133264	AP gradient	wingless-type MMTV integration site family, member 4 (WNT4)	uc001bfs.4	6e-38,	wnt,	PF00110.14,	3.7e-63,	Adell, 2009	NA	NA	NA
dd_15686	dd_Smed_v4_15686_0_1	-5.52 (-8.63, -2.08)	-3.18343	-0.0133264	AP gradient, CNS	NA	NA	NA	NA	NA	NA		TCAACGGGGTCATCAACGA	TGAAGAGCCGACAAATGACA	TCGCAGGAAATTCAGCACT
sp5*	dd_Smed_v4_7824_0_1	-5.30 (-8.59, -1.68)	-2.94084	-0.0133264	AP gradient	Sp3 transcription factor (SP3)	uc002uif.3	2e-45,	zf-H2C2_2, zf-C2H2, zf-C2H2_4,	PF13465.1, PF00096.21, PF13894.1,	2.7e-12, 8.7e-12, 5.2e-09,	Reuter, 2015	NA	NA	NA
EFR3B*	dd_Smed_v4_3212_0_1	-5.01 (-8.12, -1.57)	-2.90751	-0.0133264	AP gradient, CNS	EFR3 homolog B (S. cerevisiae) (EFR3B)	uc002rfw.2	4e-127,	NA	NA	NA		GACCCCTCGACTGAAGCC	AATATTCAGCCGGTGATCAGT	GTGGGGCCATTAGCAGCA
PPP2R3A*	dd_Smed_v4_14696_0_1	-5.08 (-8.19, -1.57)	-2.83324	-0.0133264	unclear pattern	protein phosphatase 2, regulatory subunit B'', alpha (PPP2R3A)	uc003eqw.2	2e-154,	EF_hand_5,	PF13499.1,	1.7e-14,		ACATGCATGCATCCGATGGA	TACAAATGTCGGTTATTTGCGTT	CCTTCTGTTCGAGCGCGA
dd_13065	dd_Smed_v4_13065_0_1	-3.40 (-6.84, -1.02)	-2.82206	-0.0133264	AP gradient	NA	NA	NA	Death,	PF00531.17,	1.8e-11,		TGATTTGCCTCCGACAAACG	TGGGATCAACATTACGGACTGG	TGTTTTGGATCCTTACCTCTCTT
CTNNB1*	dd_Smed_v4_9667_0_1	-3.66 (-7.31, -1.02)	-2.7332	-0.0133264	AP gradient, CNS	catenin (cadherin-associated protein), beta 1, 88kDa (CTNNB1)	uc011azg.1	2e-14,	NA	NA	NA		TGCTCTATTGGGTGAGCGG	GAACCCCATTCGGATGTGAGA	TCGTCATTGGAATGTCGGTCT
ALX1*	dd_Smed_v4_21801_0_1	-6.95 (-10.24, -2.82)	-2.68885	-0.0133264	CNS	ALX homeobox 1 (ALX1)	uc001tae.4	3e-23,	Homeobox,	PF00046.24,	1.6e-22,		CCAATAATGACTGAAGCTGGCA	TTCAATCAATGCAACGAGAAGTT	AGGGCATTATGCGAGCCA
dd_33146	dd_Smed_v4_33146_0_1	-7.93 (-10.24, -1.21)	-2.6594	-0.0133264	no signal	NA	NA	NA	NA	NA	NA		CCGCCAAAACAGCTTCGG	AGGTTAAGCCTCACGGTTCA	CGAGAGGACCGGAGTGGA
CCNG2*	dd_Smed_v4_6866_0_1	-3.00 (-6.14, -0.66)	-2.50807	-0.0133264	CNS	cyclin G2 (CCNG2)	uc011ccc.1	3e-19,	Cyclin_N, Cyclin_C,	PF00134.18, PF02984.14,	3.2e-12, 0.00016,		AAAAGAGAATGTTGGCAATGGTC	AAAGTTTATCGAATCTGCCGAAC	ACACTGTATTCTCGTTTCCAGA
dd_29877	dd_Smed_v4_29877_0_1	-4.39 (-7.46, -0.84)	-2.41368	-0.0133264	unclear pattern	NA	NA	NA	NA	NA	NA		TGCTCGGTGAACGGAGTG	CACAGTCAGATCACCGGTGT	ACTCAAAGCATGGCGAGTGA
PCDH11*	dd_Smed_v4_17110_0_1	-4.86 (-8.08, -0.91)	-2.38523	-0.0133264	CNS	protocadherin 11 X-linked (PCDH11X)a	uc004efj.1	6e-56,	Cadherin,	PF00028.12,	1.3e-66,		AGAGGCAGCAGTTGACCA	AGGGTACACGAATACCGGT	TGCGGCTCATCGGTAACA
CASK*	dd_Smed_v4_5730_0_1	-3.51 (-7.31, -0.62)	-2.37243	-0.0133264	unclear pattern	calcium/calmodulin-dependent serine protein kinase (MAGUK family) (CASK)	uc004dfj.4	1e-116,	Guanylate_kin, PDZ, SH3_1, SH3_2,	PF00625.16, PF00595.19, PF00018.23, PF07653.12,	9.1e-43, 1.2e-12, 1.9e-06, 2.1e-06,		CAGTTGTGCGCACGTGAT	GGTAGCCAATATTTTCCCCGGA	TCCAAGTGGGGAGGGGAA
ATG9A*	dd_Smed_v4_5369_0_1	-3.33 (-7.28, -0.55)	-2.318	-0.0133264	CNS	autophagy related 9A (ATG9A)	uc002vkf.1	1e-85,	APG9,	PF04109.11,	1.7e-97,		ACCGCAATTGCACCAGTT	CGAGATGCATTAAAAATCCGAGA	GTGTGCACGAGTCATGCT
RPS6KB1*	dd_Smed_v4_11674_0_1	-4.17 (-7.38, -0.58)	-2.29193	-0.0133264	unclear pattern	ribosomal protein S6 kinase, 70kDa, polypeptide 1 (RPS6KB1)	uc010woo.2	2e-134,	Pkinase, Pkinase_Tyr, Pkinase_C,	PF00069.20, PF07714.12, PF00433.19,	1.6e-70, 1.2e-38, 1.1e-06,		AGTCATCGAGTGGTCACGA	TGAAAGTTTTAAAGAAAGCGCGT	AGGGGGCACTCAATCACA
DICER1*	dd_Smed_v4_6814_0_1	-4.20 (-7.42, -0.58)	-2.26995	-0.0133264	CNS	DICER1	uc001ydv.2	3e-92,	Ribonuclease_3, PAZ, dsRNA_bind, Helicase_C, dsrm,	PF00636.21, PF02170.17, PF03368.9, PF00271.26, PF00035.20,	3.2e-48, 1.1e-30, 3.2e-23, 4.8e-06, 3e-05,		GGGCACGTTGACTGGGAA	GACTCGTCGAAAACCAAATGGA	TCCAGTGTCACCCGGAGT
LRRC4*	dd_Smed_v4_8690_0_1	-3.11 (-7.24, -0.44)	-2.23594	-0.0133264	CNS, midline	leucine rich repeat containing 4 (LRRC4)	uc022akv.1	4e-10,	LRR_8,	PF13855.1,	3.9e-09,		CTGTACGCCGTGCTTGGA	ACATGCGAAAATGGCGGAC	TGCAACAGGATTCACAGCT
PCDH11*	dd_Smed_v4_15181_0_1	-4.13 (-7.28, -0.55)	-2.23509	-0.0133264	CNS	protocadherin 11 Y-linked (PCDH11Y)a	uc010nwg.1	1e-75,	Cadherin, Cadherin_2,	PF00028.12, PF08266.7,	2.2e-76, 1e-10,		TGCCACGACAATGGGAGTC	TGACCAAAATGACAATATCCCCT	TCGCCGTTCCCAGAATCG
ITGA3*	dd_Smed_v4_8943_0_1	-5.01 (-8.45, -0.73)	-2.20959	-0.0133264	epidermis	integrin, alpha 3 (antigen CD49C, alpha 3 subunit of VLA-3 receptor) (ITGA3)b	uc010dbm.3	3e-44,	Integrin_alpha2, FG-GAP,	PF08441.7, PF01839.18,	1.6e-27, 1.3e-10,		AACACAGTGACAGGCGGG	TGCAAAACACCGAATTCGAAGT	TGGCAGCAACTACGCGAA
NCAM2*	dd_Smed_v4_9674_0_1	-4.50 (-7.64, -0.48)	-2.11839	-0.0133264	unclear pattern	neural cell adhesion molecule 2 (NCAM2)	uc002yld.2	5e-25,	I-set, Ig_2, Ig_3, ig, V-set, fn3,	PF07679.11, PF13895.1, PF13927.1, PF00047.20, PF07686.12, PF00041.16,	1.4e-28, 8.6e-22, 1.5e-19, 1.9e-19, 1.7e-18, 5.3e-11,		GCCAACAGGCCCTACAGT	ACCGTAAGAGATGTTGATACTGG	AGGCCCTGGAACTTGTGC
PAK1*	dd_Smed_v4_5230_0_1	-3.98 (-7.13, -0.33)	-2.11599	-0.0133264	no signal	p21 protein (Cdc42/Rac)-activated kinase 1 (PAK1)	uc010rsn.2	2e-16,	Pkinase, Pkinase_Tyr, ubiquitin,	PF00069.20, PF07714.12, PF00240.18,	3.6e-34, 4.4e-24, 1.7e-13,		ACTGTTAGCCAGATGAAGCACA	TCAAAGATGGCATTGAACTTTCA	TCCGTGGGAATGGGCTAGT
FBN2*	dd_Smed_v4_1748_0_1	-4.06 (-7.28, -0.26)	-2.07415	-0.0133264	parapharyngeal cells	fibrillin 2 (FBN2)	uc003kuu.3	2e-34,	EGF_CA, VWA, cEGF, VWA_2,	PF07645.10, PF00092.23, PF12662.2, PF13519.1,	4.9e-25, 7.6e-22, 3.1e-10, 3.2e-06,		CCAAGATGTCCAAGCCGGT	ACTAATGTGGACGGAAAATGCA	CCGGGTTTGCAAGCACAC
CLK4*	dd_Smed_v4_2315_0_1	-2.74 (-6.25, -0.07)	-1.99656	-0.0133264	CNS	CDC-like kinase 4 (CLK4)	uc003mjh.1	7e-47,	Pkinase, Pkinase_Tyr,	PF00069.20, PF07714.12,	8.7e-43, 3.3e-19,		GCCAGTAGTCATTGCATACAACC	TGTTTCGCGATCGAGTCAGT	CCTGAGGGCCTCACTCGA
NPR1*	dd_Smed_v4_12933_0_1	-5.30 (-8.37, -0.18)	-1.99342	-0.0133264	parenchyma large cells	natriuretic peptide receptor A/guanylate cyclase A (NPR1)	uc010pdz.2	2e-116,	Guanylate_cyc, Pkinase_Tyr, Pkinase, ANF_receptor, HNOBA,	PF00211.15, PF07714.12, PF00069.20, PF01094.23, PF07701.9,	2.4e-61, 8.2e-30, 1.4e-28, 2.9e-27, 1.2e-05,		TGTTGCTCTACGCCACCG	TCTCGGCTCCCCAAAGGA	ACGGAATCTGGCAGCTGT
GRIN3A*	dd_Smed_v4_18414_0_1	-5.12 (-8.30, -0.11)	-1.98539	-0.0133264	unclear pattern	glutamate receptor, ionotropic, N-methyl-D-aspartate 3A (GRIN3A)	uc004bbq.1	7e-36,	Lig_chan, Lig_chan-Glu_bd,	PF00060.21, PF10613.4,	1.3e-09, 1.5e-08,		ACTGCCCGTGTTAGCCAC	TCCATTCTTTGGGTCACGGT	CTTGGGGACGCCTATTGCA
FOXL1*	dd_Smed_v4_19255_0_1	-3.44 (-6.58, 0.11)	-1.87795	-0.0133264	unclear pattern	forkhead box L1 (FOXL1)	uc002fjr.3	2e-47,	Fork_head,	PF00250.13,	2.5e-43,		GCTCGTTGCATTAACAATCAGC	CGTGCTCAATTGGATCGCC	TTTTCTTTTTGACCGAAGAAGCA
dd_763	dd_Smed_v4_763_0_1	-3.36 (-7.06, 0.15)	-1.86949	-0.0133264	unclear pattern	NA	NA	NA	NA	NA	NA		GCGTTTCACAGGCAGACG	CGACGAATCAGTGAGACAAGC	CCACCAACCGCAAATGGC
IKBKE*	dd_Smed_v4_1972_0_1	-3.14 (-6.69, 0.18)	-1.84698	-0.0133264	unclear pattern	inhibitor of kappa light polypeptide gene enhancer in B-cells, kinase epsilon (IKBKE)	uc009xbv.2	8e-51,	Pkinase, Pkinase_Tyr,	PF00069.20, PF07714.12,	5.3e-39, 2e-24,		CCACCAGGGGCTTTGTGA	TGCTCGAATGTCTGAAAGAAGGA	GGGAGAGGGTCATCAAAGCT
DYRK1A*	dd_Smed_v4_9374_0_1	-3.55 (-6.69, 0.26)	-1.82987	-0.0133264	unclear pattern	dual-specificity tyrosine-(Y)-phosphorylation regulated kinase 1A (DYRK1A)5	uc002ywm.3	3e-125,	Pkinase, Pkinase_Tyr,	PF00069.20, PF07714.12,	2e-49, 6.9e-20,		ACAGCAGCCGCCTATTCA	TCAACCGATAAAGCAACTGCC	TGGTCCACCGGTCTCTGT
INTS9*	dd_Smed_v4_5262_0_1	-2.56 (-6.18, 0.26)	-1.79821	-0.0133264	CNS, ventral dots	integrator complex subunit 9 (INTS9)	uc011law.2	8e-88,	Beta-Casp,	PF10996.3,	4.4e-10,		GCGTTTCTAGAAGACGGTGC	AACACTTCTTGGGTTGCCA	TCGTCAACGCCAATCGGT
ERBB4*	dd_Smed_v4_7012_0_1	-2.52 (-6.22, 0.40)	-1.70132	-0.0133264	unclear pattern	v-erb-a erythroblastic leukemia viral oncogene homolog 4 (avian) (ERBB4)JM-a/CVT-2	uc002veh.1	9e-72,	Pkinase_Tyr, Pkinase, Recep_L_domain, Furin-like,	PF07714.12, PF00069.20, PF01030.19, PF00757.15,	2.9e-78, 8.1e-38, 6.3e-29, 3.8e-17,		ATCCGCGGGGCAAATTCA	CGCAACCTGATTGATAAAGGCC	GGATTAGGACCCACGCAGG
Smed-wnt1	dd_Smed_v4_28398_0_1	-4.94 (-8.01, 1.39)	-1.65811	-0.0133264	posterior pole	wingless-type MMTV integration site family, member 1 (WNT1)	uc001rsu.3	3e-59,	wnt,	PF00110.14,	7e-81,	Petersen, 2008	NA	NA	NA
NOTCH4*	dd_Smed_v4_4792_0_1	-3.95 (-7.20, 0.91)	-1.62564	-0.0133264	gut	notch 4 (NOTCH4)	uc011jrs.2	4e-10,	EGF,	PF00008.22,	3.6e-07,		GGCTCACATTCTGATTGCGC	CACACAAGCCAACTTCAACAGT	TTGGAGGCAATGCTGGGG
ANAPC4*	dd_Smed_v4_4177_0_1	-2.08 (-5.37, 0.66)	-1.49196	-0.0133264	unclear pattern	anaphase promoting complex subunit 4 (ANAPC4)	uc003gro.3	2e-19,	Apc4, Apc4_WD40,	PF12896.2, PF12894.2,	1.9e-13, 3.3e-10,		AAGATCGCCGCACAAGCT	TGGAGACCAAGCTTTTAGAACT	AAATGCGCATACATCCATTGAA
DNHD1*	dd_Smed_v4_8984_0_1	-3.55 (-7.90, 2.30)	-1.48834	-0.0133264	unclear pattern	dynein heavy chain domain 1 (DNHD1)	uc001mdp.3	2e-24,	DHC_N2, MT,	PF08393.8, PF12777.2,	7.9e-41, 7.8e-17,		TTGGCAACCGCACTCGAT	TCACGACAACAAAAGTCTCGA	GAACAAGTCGCACCGGGA
ELP3*	dd_Smed_v4_3310_0_1	-2.30 (-6.14, 0.80)	-1.46209	-0.0133264	unclear pattern	elongator acetyltransferase complex subunit 3 (ELP3)	uc003xgo.4	0,	Radical_SAM, Acetyltransf_1,	PF04055.16, PF00583.19,	9.7e-18, 4e-10,		TGTTCGGTCAGCCAGTGG	CGCTGTCATGTGCAAGCC	TCCCTCGAGTTCATAGCCCA
ANK2*	dd_Smed_v4_10835_0_1	-3.29 (-6.43, 1.46)	-1.43911	-0.0133264	CNS	ankyrin 2, neuronal (ANK2)	uc003ibc.2	0,	Ank_2, Ank, Ank_4, Ank_3, Ank_5, ZU5, Death,	PF12796.2, PF00023.25, PF13637.1, PF13606.1, PF13857.1, PF00791.15, PF00531.17,	2.4e-206, 2.5e-189, 1.9e-139, 6.9e-140, 7.3e-125, 6.5e-26, 1.1e-05,		TCGGGATGGGCTCTCTCC	TTCATTGCGCCGCCAGAT	CCTTGTTGGGCTGCGAGA
RGR*	dd_Smed_v4_7301_0_1	-1.97 (-6.36, 0.88)	-1.37775	-0.0133264	unclear pattern	retinal G protein coupled receptor (RGR)	uc001kdc.1	3e-16,	7tm_1,	PF00001.16,	6.7e-14,		TCAGGAATTTTGGGTGCAAAACT	CGTAATACCTTGCAAAACAACCA	AACATGCAAAGTCGAAGATTGT
MTR*	dd_Smed_v4_10302_0_1	-2.60 (-5.85, 1.02)	-1.36242	-0.0133264	no signal	5-methyltetrahydrofolate-homocysteine methyltransferase (MTR)	uc001hyi.4	0,	S-methyl_trans, Met_synt_B12, Pterin_bind, B12-binding_2, B12-binding,	PF02574.11, PF02965.12, PF00809.17, PF02607.12, PF02310.14,	1.2e-98, 5.3e-46, 2e-39, 2.7e-19, 1.3e-18,		GTGGAACCACTCCTGCCC	AGCCGTACGTGGTTATTCTCC	TGCACCCCATGACAACTCC
MAP3K3*	dd_Smed_v4_9266_0_1	-2.63 (-5.96, 1.17)	-1.33912	-0.0133264	CNS	mitogen-activated protein kinase kinase kinase 3 (MAP3K3)	uc010wpp.2	5e-88,	Pkinase, Pkinase_Tyr, PB1,	PF00069.20, PF07714.12, PF00564.19,	2.4e-60, 4.2e-38, 5.1e-07,		AGTGACCTCGAACATTCCACA	CACAAATCATATCACACTCGCCC	TTGCTGCTGCTGCTGACA
LDB3*	dd_Smed_v4_10318_0_1	-2.78 (-6.03, 1.57)	-1.27825	-0.0133264	unclear pattern	LIM domain binding 3 (LDB3)	uc009xsz.3	3e-40,	LIM, PDZ,	PF00412.17, PF00595.19,	5.9e-31, 1.9e-11,		TCCCCAATGAAATTTGCATGAC	TCGGATAACCTGTGACTCGG	GCGGTATTTGCATGGACTCTAC
FBXL7*	dd_Smed_v4_10647_0_1	-2.19 (-6.00, 1.35)	-1.23985	-0.0133264	epidermis	F-box and leucine-rich repeat protein 7 (FBXL7)	uc003jfn.1	2e-53,	LRR_6, F-box-like, F-box,	PF13516.1, PF12937.2, PF00646.28,	6.2e-12, 8.5e-11, 3.1e-07,		CCAAACCGCAGACTCAGGA	TCTTCAAGACCATCCTCATACCA	CAACCGCTTCGTCGGAGA
PCDH17*	dd_Smed_v4_7871_0_1	-2.63 (-6.07, 1.57)	-1.22194	-0.0133264	CNS	protocadherin 17 (PCDH17)	uc001vhq.1	6e-58,	Cadherin, Cadherin_2,	PF00028.12, PF08266.7,	1.3e-45, 6.1e-05,		CGCTCGGTTATCGGATCCC	AGCACAAGATCTTGATAACGCA	GCTCTGGCAATGAATCCCG
COL4A3BP*	dd_Smed_v4_5076_0_1	-1.90 (-5.63, 1.54)	-1.12926	-0.0133264	unclear pattern	collagen, type IV, alpha 3 (Goodpasture antigen) binding protein (COL4A3BP)	uc003kds.3	2e-79,	PH, START,	PF00169.24, PF01852.14,	8.2e-14, 4.5e-12,		GCCAGAAACTGCCGTTGG	TCAGAAAAAGCTTCCACACCT	GGCGGGCAACAGTTCTCA
dd_10567	dd_Smed_v4_10567_0_1	-2.12 (-5.92, 1.75)	-1.1022	-0.0133264	unclear pattern	NA	NA	NA	Innexin,	PF00876.13,	2.2e-105,		TCGACAAATTTTAATGCCGACTT	CGGACAACTCTTTCGTGTTCC	ACTACAGTAGAGCTACGGTTAAC
NBN*	dd_Smed_v4_13269_0_1	-1.65 (-5.48, 2.30)	-1.07148	-0.0133264	parenchyma	nibrin (NBN)	uc003yej.1	1e-24,	FHA,	PF00498.21,	1.5e-13,		GGTGCTCAACCCGGAGTT	AGCTTTTGATATCGTCTGTTCGA	CGAAACTGAACGAGCGGC
WDR61*	dd_Smed_v4_5139_0_1	-1.24 (-4.97, 1.65)	-0.875283	-0.0133264	unclear pattern	WD repeat domain 61 (WDR61)	uc002bdo.3	4e-101,	WD40, Nup160, Cytochrom_D1, eIF2A,	PF00400.27, PF11715.3, PF02239.11, PF08662.6,	5.5e-53, 3e-06, 1.1e-05, 3.5e-05,		TTGTTAATATCATGCCCACAGC	AGAGAACATATGGTCTTGTGCA	GCATTTCAGTTGCTGCAATCA
CASKIN1*	dd_Smed_v4_5280_0_1	-0.91 (-4.94, 2.38)	-0.605479	-0.0133264	epidermis	CASK interacting protein 1 (CASKIN1)	uc010bsg.1	8e-11,	Ank_2, Ank_5, Ank, Ank_3, Ank_4,	PF12796.2, PF13857.1, PF00023.25, PF13606.1, PF13637.1,	7.8e-22, 1.8e-21, 2.9e-20, 4.1e-19, 1e-17,		GACCTGAGAGAAATTATCTGCGT	CGTTTCTCGCCTATGCAATGT	TCAATAATGAACACAAGCCGAAT

## Sheet: Supplementary File 1F
Supplementary File 1F. List of 44 mRGs
The 44 mRGs are ranked by Smin differential expression score (see Methods for details). Genes below double line were not significant in any SCDE analysis at p<0.005
* indicates gene name is human best BLASTx hit. scs, single cell sequencing. Family, gene family or signaling pathway family
	Score		SCDE p-value			Gene information							Human best BLASTx				PFAM
Name	Rank	Smin	ante vs. post	head vs. postPx	prePx vs. tail	Muscle expression	ISH pattern	Family	Published ISH (S.mediterranea)	Published ISH (D.japonica)	GenBank id	Contig	Name	Description	id	E-val	Description	id	e-value
Smed-ndl-4	1	20.9421	1.4378e-07	2.67815e-10	0.401131	Witchley, 2013	Anterior tip	FGFRL	Rink, 2009	NA	GU592831	dd_Smed_v4_12674_0_1	FGFRL1	fibroblast growth factor receptor-like 1 (FGFRL1)	uc010ibo.3	8e-22	Immunoglobulin I-set domain, Immunoglobulin domain, Immunoglobulin domain, Immunoglobulin V-set domain, Immunoglobulin domain	PF07679.11, PF13895.1, PF00047.20, PF07686.12, PF13927.1	1e-27, 2e-17, 9.2e-14, 4.3e-11, 3e-08,
Smed-ndl-2	2	18.1052	6.30817e-09	4.56984e-09	0.00275357	Figure 1-figure supplement 3A	Anterior	FGFRL	Reuter, 2015	NA	KT983961	dd_Smed_v4_8340_0_1	FGFR3	fibroblast growth factor receptor 3 (FGFR3)	uc003gdq.3	5e-09	Immunoglobulin I-set domain, Immunoglobulin domain, Immunoglobulin domain, Immunoglobulin V-set domain, Immunoglobulin domain	PF07679.11, PF13927.1, PF13895.1, PF07686.12, PF00047.20	4.1e-17, 2.7e-14, 4.1e-14, 1.8e-12, 3.8e-09,
Smed-fz4-1	3	17.9085	5.563e-09	0.003158	2.72411e-07	Witchley, 2013	Posterior	Wnt	Gurley, 2008	NA	EU130789	dd_Smed_v4_11650_0_1	FZD10	frizzled family receptor 10 (FZD10)	uc001uii.3	6e-114	Frizzled/Smoothened family membrane region, Fz domain	PF01534.12, PF01392.17	1.6e-90, 2.4e-27,
Smed-fz5/8-4	4	17.65	1.33359e-05	7.20446e-09	0.499804	Figure 1-figure supplement 3A	Anterior, CNS	Wnt	NA	NA	KT983962	dd_Smed_v4_11823_0_1	FZD5	frizzled family receptor 5 (FZD5)	uc021vvr.1	0	Frizzled/Smoothened family membrane region, Fz domain	PF01534.12, PF01392.17	3.4e-123, 6e-32,
Smed-lox5a	5	17.4709	8.61715e-09	6.77704e-06	0.000176021	inferred from scs	Posterior	Hox	Currie, 2016	NA	KT983963	dd_Smed_v4_16227_0_1	HOXB7	homeobox B7 (HOXB7)	uc002inv.3	8e-23	Homeobox domain	PF00046.24	2.4e-11,
dd_13065	8	16.0098	3.71449e-08	2.10158e-06	0.00238581	Figure 1-figure supplement 3A; Reuter, 2015	Posterior, mouth	other	Reuter, 2015	NA	KP003816	dd_Smed_v4_13065_0_1	NA	NA	NA	NA	Death domain	PF00531.17	1.8e-11,
Smed-ndk	9	14.1903	2.60511e-05	2.29144e-07	0.0558437	Witchley, 2013	Anterior, CNS	FGFRL	Rink, 2009	Cebria, 2002	GU592830	dd_Smed_v4_11285_0_1	FGFRL1	fibroblast growth factor receptor-like 1 (FGFRL1)	uc010ibo.3	4e-15	Immunoglobulin I-set domain, Immunoglobulin domain, Immunoglobulin domain, Immunoglobulin V-set domain, Immunoglobulin domain	PF07679.11, PF13895.1, PF13927.1, PF07686.12, PF00047.20	1.4e-19, 6.8e-15, 2.1e-11, 1.1e-08, 4.2e-07,
Smed-zic-2	10	10.1753	1.26996e-05	0.0019474	0.0677861	inferred from scs	Anterior	other	Vazquez-Doorman, 2014	NA	KT983964	dd_Smed_v4_15531_0_1	ZIC2	Zic family member 2 (ZIC2)	uc001von.3	5e-79	Zinc-finger double domain, Zinc finger, C2H2 type, C2H2-type zinc finger	PF13465.1, PF00096.21, PF13894.1	4e-17, 9.3e-13, 7.5e-08,
Smed-ndl-5	11	9.88302	1.70117e-05	0.000581713	0.0349896	Figure 1-figure supplement 3A	Anterior, CNS	FGFRL	NA	NA	JX010560	dd_Smed_v4_5102_0_1	NA	NA	NA	NA	Immunoglobulin I-set domain, Immunoglobulin V-set domain	PF07679.11, PF07686.12	4.9e-07, 2.2e-05,
sp5*	12	9.85576	1.74817e-05	0.00147437	0.00163661	inferred from scs	Posterior	other	Reuter, 2015	NA	KP003818	dd_Smed_v4_7824_0_1	SP3	Sp3 transcription factor (SP3)	uc002uif.3	2e-45	Zinc-finger double domain, Zinc finger, C2H2 type, C2H2-type zinc finger	PF13465.1, PF00096.21, PF13894.1	2.7e-12, 8.7e-12, 5.2e-09,
Smed-Post-2c	13	9.85177	1.75516e-05	0.00162894	0.000135579	Figure 1-figure supplement 3A	Posterior	Hox	Currie, 2016	NA	KT983965	dd_Smed_v4_12467_0_1	HOXC12	homeobox C12 (HOXC12)	uc010soq.2	1e-15	Homeobox domain	PF00046.24	1.3e-20,
dd_4427	15	8.37828	0.000369575	7.66075e-05	0.034055	inferred from scs	Posterior	other	NA	NA	KT983966	dd_Smed_v4_4427_0_1	NA	NA	NA	NA	NA	NA	NA
Smed-wnt11-2	16	8.18835	9.26322e-05	0.00776186	0.000679826	Witchley, 2013	Posterior tip	Wnt	Adell, 2009	NA	FJ463751	dd_Smed_v4_16209_0_1	WNT4	wingless-type MMTV integration site family, member 4 (WNT4)	uc001bfs.4	6e-38	wnt family	PF00110.14	3.7e-63,
DNAJB13*	17	7.60109	0.000166663	0.000933355	0.0313746	inferred from scs	Anterior, epidermis	other	NA	NA	KT983967	dd_Smed_v4_4820_0_1	DNAJB13	DnaJ (Hsp40) homolog, subfamily B, member 13 (DNAJB13)	uc001ouo.3	9e-133	DnaJ C terminal domain, DnaJ domain	PF01556.13, PF00226.26	3.2e-24, 1e-21,
Smed-wnt11-1	18	7.47672	0.000188738	0.00333159	0.00500757	Witchley, 2013	Posterior, mouth	Wnt	Petersen, 2008	NA	EU296633	dd_Smed_v4_14391_0_1	WNT11	wingless-type MMTV integration site family, member 11 (WNT11)	uc001oxe.3	1e-32	wnt family	PF00110.14	6.6e-65,
dd_15686	19	7.33619	0.000217224	0.00488537	0.000727716	inferred from scs	Posterior, eyes	other	NA	NA	KT983968	dd_Smed_v4_15686_0_1	NA	NA	NA	NA	NA	NA	NA
Smed-wnt2	20	7.08484	0.0347441	0.000279313	0.21423	Witchley, 2013	Pre-pharyngeal	Wnt	Petersen, 2008	NA	EU296634	dd_Smed_v4_13487_0_1	WNT2B	wingless-type MMTV integration site family, member 2B (WNT2B)	uc001eca.3	1e-88	wnt family	PF00110.14	4e-103,
Smed-hox4b	23	6.85112	0.000352883	0.00358186	0.0200635	inferred from scs	Posterior	Hox	Iglesias, 2008; Currie, 2016	Orii, 1999	EU082824	dd_Smed_v4_2442_0_1	HOXC6	homeobox C6 (HOXC6)	uc001ses.3	1e-30	Homeobox domain	PF00046.24	1.5e-20,
Smed-ndl-1	25	6.60891	0.000548034	0.000449634	0.287987	inferred from scs	Anterior, CNS	FGFRL	NA	NA	KT983969	dd_Smed_v4_8310_0_1	FGFRL1	fibroblast growth factor receptor-like 1 (FGFRL1)	uc010ibo.3	7e-08	Immunoglobulin I-set domain	PF07679.11	2.3e-07,
Smed-wntP-2	27	6.33875	0.000589183	0.00553834	0.111355	Witchley, 2013	Posterior	Wnt	Petersen, 2008	NA	EU296631	dd_Smed_v4_7326_0_1	WNT4	wingless-type MMTV integration site family, member 4 (WNT4)	uc001bfs.4	8e-76	wnt family	PF00110.14	6.1e-98,
Smed-sFRP-1	28	6.28091	0.00195601	0.000624288	0.34957	Witchley, 2013	Anterior tip	Wnt	Gurley, 2008; Petersen, 2008	NA	EU296635	dd_Smed_v4_13985_0_1	SFRP5	secreted frizzled-related protein 5 (SFRP5)	uc001kor.4	2e-37	Fz domain	PF01392.17	1.9e-29,
Smed-axin2	29	6.06369	0.0041163	0.000775872	0.0984024	inferred from scs	Posterior	Wnt	Iglesias, 2011	NA	GU808529	dd_Smed_v4_5531_0_1	AXIN2	axin 2 (AXIN2)	uc002jfj.1	2e-15	Regulator of G protein signaling domain	PF00615.14	6.4e-18,
ptk7	30	6.04331	0.0599638	0.000791858	0.0936256	Reuter, 2015	Midbody	Wnt	Reuter, 2015	NA	KP003817	dd_Smed_v4_6999_0_1	NA	NA	uc003oue.1	7e-52	Protein tyrosine kinase, Immunoglobulin I-set domain, Immunoglobulin domain, Protein kinase domain, Immunoglobulin V-set domain	PF07714.12, PF07679.11, PF13895.1, PF00069.20, PF07686.12	1.8e-64, 2.9e-53, 2.7e-38, 1.9e-33, 5.4e-33,
CTNNB1*	33	5.8611	0.00098021	0.000950269	0.00313613	inferred from scs	Posterior, CNS	other	NA	NA	KT983970	dd_Smed_v4_9667_0_1	CTNNB1	catenin (cadherin-associated protein), beta 1, 88kDa (CTNNB1)	uc011azg.1	2e-14	NA	NA	NA
IGFALS*	35	5.82759	0.000982688	0.0636718	0.0140323	inferred from scs	Posterior	other	NA	NA	KT983971	dd_Smed_v4_2769_0_1	IGFALS	insulin-like growth factor binding protein, acid labile subunit (IGFALS)	uc002cmy.3	1e-12	Leucine rich repeat, Leucine Rich repeats (2 copies), Leucine Rich Repeat	PF13855.1, PF12799.2, PF00560.28	6.4e-42, 2.8e-14, 4.3e-07,
Smed-notum	37	5.64515	0.00534947	0.0011796	0.217487	Witchley, 2013	Anterior tip	Wnt	Petersen, 2011	NA	JF725701	dd_Smed_v4_24180_0_1	NOTUM	notum pectinacetylesterase homolog (Drosophila) (NOTUM)	uc010wvg.2	6e-73	Pectinacetylesterase	PF03283.8	4.9e-68,
Smed-ndl-3	41	5.28198	0.0179373	0.326113	0.00169699	Witchley, 2013	Pre-pharyngeal	FGFRL	Rink, 2009	NA	GU592832	dd_Smed_v4_6604_0_1	NA	NA	NA	NA	Immunoglobulin domain, Immunoglobulin domain	PF13895.1, PF00047.20	2.7e-10, 8.7e-05,
EFR3*	43	5.21124	0.30461	0.219036	0.00182162	inferred from scs	Anterior, CNS	other	NA	NA	KT983972	dd_Smed_v4_3212_0_1	EFR3B	EFR3 homolog B (S. cerevisiae) (EFR3B)	uc002rfw.2	4e-127	NA	NA	NA
Smed-fz4-2	48	5.03921	0.00216429	0.00600753	0.00746563	inferred from scs	Posterior	Wnt	NA	NA	KT983973	dd_Smed_v4_13186_0_1	FZD9	frizzled family receptor 9 (FZD9)	uc003tyb.3	2e-20	Frizzled/Smoothened family membrane region	PF01534.12	8.4e-35,
Smed-wntless	58	4.78952	0.00277986	0.028176	0.0149414	Witchley, 2013	Posterior, CNS	Wnt	Adell, 2009	NA	FJ463748	dd_Smed_v4_9546_0_1	WLS	wntless homolog (Drosophila) (WLS)	uc001deg.2	2e-109	Wnt-binding factor required for Wnt secretion	PF06664.7	1.9e-73,
CSMD1*	66	4.55116	0.00353079	0.00559944	0.431631	inferred from scs	Anterior, CNS, midline	other	NA	NA	KT983974	dd_Smed_v4_13071_0_1	CSMD1	CUB and Sushi multiple domains 1 (CSMD1)	uc011kwj.2	3e-27	Sushi domain (SCR repeat)	PF00084.15	1.4e-39,
Smed-Post-2d	70	4.5084	0.0036856	0.152118	0.0434899	inferred from scs	Posterior	Hox	Iglesias, 2008; Currie, 2016	Nogi, 2001	EU082823	dd_Smed_v4_12317_0_3	HOXA9	homeobox A9 (HOXA9)	uc003syt.3	1e-17	Homeobox domain	PF00046.24	8.5e-20,
dd_13735	73	4.45191	0.0396126	0.00390064	0.215275	inferred from scs	Anterior and posterior tips, CNS	other	NA	NA	KT983975	dd_Smed_v4_13735_0_1	NA	NA	NA	NA	NA	NA	NA
FAM160A1*	74	4.41914	0.00403108	0.0462872	0.0862432	inferred from scs	Posterior	other	NA	NA	KT983976	dd_Smed_v4_9831_0_1	FAM160A1	family with sequence similarity 160, member A1 (FAM160A1)	uc003imj.2	2e-62	Retinoic acid induced 16-like protein	PF10257.4	6e-42,
Smed-fz5/8-3	97	4.2309	0.00487013	0.00603328	0.257091	Figure 1-figure supplement 3A	Anterior tip	Wnt	NA	NA	KT983977	dd_Smed_v4_16571_0_1	FZD5	frizzled family receptor 5 (FZD5)	uc021vvr.1	0	Frizzled/Smoothened family membrane region, Fz domain	PF01534.12, PF01392.17	2.2e-119, 3.9e-33,
Smed-prep	128	3.98697	0.0196431	0.00622394	0.0665131	inferred from scs	Anterior	other	Felix, 2010	NA	GU290186	dd_Smed_v4_8606_0_1	PKNOX2	PBX/knotted 1 homeobox 2 (PKNOX2)	uc010sba.2	1e-61	Homeobox KN domain, Homeobox domain	PF05920.6, PF00046.24	8.6e-19, 7.8e-08,
Smed-zic-1	239	3.4278	0.0124312	0.0109387	0.0218676	Vogg, 2014	Anterior	other	Vogg, 2014; Vazquez-Doorman, 2014	NA	KF751216	dd_Smed_v4_22585_0_1	ZIC3	Zic family member 3 (ZIC3)	uc004fak.3	5e-85	Zinc-finger double domain, Zinc finger, C2H2 type, C2H2-type zinc finger	PF13465.1, PF00096.21, PF13894.1	1.1e-20, 3e-13, 1.4e-06,
Smed-fz4-3	255	3.37808	0.31243	0.0115028	0.155043	inferred from scs	Pre-pharyngeal, brain	Wnt	NA	NA	KT983978	dd_Smed_v4_13356_0_1	FZD4	frizzled family receptor 4 (FZD4)	uc001pce.3	6e-97	Frizzled/Smoothened family membrane region, Fz domain	PF01534.12, PF01392.17	1.2e-69, 4e-22,
Smed-fz4-4	271	3.33022	0.0121333	0.0301052	0.0120736	inferred from scs	Pre-pharyngeal, brain	Wnt	NA	NA	KT983979	dd_Smed_v4_7210_0_1	FZD4	frizzled family receptor 4 (FZD4)	uc001pce.3	9e-147	Frizzled/Smoothened family membrane region, Fz domain	PF01534.12, PF01392.17	3.7e-107, 3.1e-27,
Smed-sFRP-2	292	3.26939	0.369691	0.0128407	0.0575975	Witchley, 2013	Anterior and midbody	Wnt	Gurley, 2010	NA	HM751831	dd_Smed_v4_8832_0_1	SFRP5	secreted frizzled-related protein 5 (SFRP5)	uc001kor.4	5e-34	Fz domain	PF01392.17	9.5e-29,
ORF2-like*	407	2.99647	0.02726	0.0169397	0.455513	inferred from scs	Posterior, CNS	other	NA	NA	KT983980	dd_Smed_v4_18000_0_1	ORF2-like protein	ORF2-like protein	uc003qit.1	2e-18	Reverse transcriptase (RNA-dependent DNA polymerase)	PF00078.22	2.5e-33,
Smed-wntA	598	2.6816	0.041298	0.0233593	0.268934	Witchley, 2013	Posterior brain, all over	Wnt	Adell, 2009	Kobayashi, 2007	FJ463750	dd_Smed_v4_4877_0_1	PRKAG1	protein kinase, AMP-activated, gamma 1 non-catalytic subunit (PRKAG1)	uc001rsy.3	1e-89	wnt family, CBS domain	PF00110.14, PF00571.23	1.4e-104, 9.5e-30,
Smed-wnt1	1461	1.97359	0.0490858	0.245365	0.0486474	Witchley, 2013	Posterior tip	Wnt	Petersen, 2008	NA	EU296630	dd_Smed_v4_28398_0_1	WNT1	wingless-type MMTV integration site family, member 1 (WNT1)	uc001rsu.3	3e-59	wnt family	PF00110.14	7e-81,
Smed-FoxD	3447	1.35608	0.097253	0.0945471	0.321196	Vogg, 2014	Anterior tip	other	Scimone, 2014; Vogg, 2014	Koinuma, 2003	KC577557	dd_Smed_v4_23249_0_1	NA	NA	uc003zfz.3	2e-53	Fork head domain	PF00250.13	1.1e-41,

## Sheet: Supplementary 1G
Supplementary File 1G. RNAi summary
* indicates gene name is human best BLASTx hit. dpa: days post amputation. blst: blastema. n/a: not applicable. unc22: C.elegans unc22 used as control RNAi
Note: The total amount of dsRNA used in each feeding was the same. Therefore, in the conditions were more than one gene was blocked, the dsRNA for each gene was diluted compared to the condition of the single gene.
#: 6 feedings, one regeneration cycle, followed by 12 more feedings, n<10 animals.
RNAi screen of Wnt signaling components, FGFRL and Hox genes (12 feedings, 2 regeneration cycles)
Gene	Regeneration phenotype 7dpa (trunk pieces)	Homeostasis phenotype#	Reference
lox5a	indented tail blst (16%; 6/37)	none	expression described in Currie, 2016
Post-2c	none	none	expression described in Currie, 2016
hox4b	none	none	expression described in Iglesias, 2008; Currie, 2016
lox5a; Post-2c; hox4b	none	none
fz4-2	none	none
fz4-1	small and/or indented tail blst (36.4%; 12/33)	none	expression described in Gurley, 2008
fz4-2; fz4-1	small and/or indented tail blst (32.4%; 12/37)	none
fz5/8-4	ectopic posterior eyes (30.8 %; 16/52)	ectopic posterior eyes
fz5/8-3	none	none
fz5/8-4; fz5/8-3	ectopic posterior eyes (23.2 %; 13/56)	ectopic posterior eyes
sFRP-1	none	ectopic anterior eyes	expression described in Petersen, 2008 and Gurley, 2008
ndl-2	none	none	expression described in Reuter, 2015
ndl-1	none	none
ndl-2;ndl-1	none	none
ndl-4	none	none	expression described in Rink, 2009
ndl-5	none	none
ndl-1; ndl-2; ndl-4; ndl-5	none	none
ndl-4; ndl-5	none	none
ndl-3	second posterior mouth (19.5%; 30/154)	second posterior mouth	expression described in Rink, 2009
wntP-2	second posterior mouth (38.6%; 68/176)	second posterior mouth	expression described in Petersen, 2008; Petersen, 2009; phenotype described in Sureda-Gómez, 2015
ptk7	second posterior mouth (15.5%; 11/71), small tail blst (63.4%; 45/71)	n/a	expression described in Reuter, 2015
ndl-2; ndl-3	second posterior mouth (16.3%; 8/49)	second posterior mouth
ptk7; ndl-3	second posterior mouth (28.6%; 20/70), small tail blst (47.1%; 33/70)	n/a
ndl-2; ndl-3; ptk7	second posterior mouth (30.2%; 19/63), small tail blst (54%; 34/63)	n/a
ptk7; wntP-2	second posterior mouth (75.5%; 37/49), small tail blst (63.3%; 31/49)	n/a
ndl-3; wntP-2	second posterior mouth (51%; 52/102)	second posterior mouth
sFRP-2	none	none	expression described in Gurley, 2010
sFRP-2; ndl-3	second posterior mouth (24.4%; 21/86)	second posterior mouth
SFRP-2; wntP-2	second posterior mouth (35.8%; 34/95)	second posterior mouth
sFRP-2; ndl-3; wntP-2	second posterior mouth (37.5%; 12/32)	second posterior mouth
fz4-3	none	none
fz4-4	none	none
fz4-4; wnt-2	none	none
wnt-2	none	none	expression described in Petersen, 2008
wnt11-1	second posterior mouth (6.7%; 1/15)	n/a	expression described in Petersen, 2008; phenotype described in Sureda-Gómez, 2015
wnt11-2	rounded tail blst (100%; 14/14)	n/a	expression described in Adell, 2009; phenotype described in Gurley, 2010 and Sureda-Gómez, 2015
Homeostasis screen for head and trunk patterning genes (8 feedings, no regeneration)
8 feedings, no regeneration	Regeneration phenotype	Homeostasis phenotype	Reference
wntA	n/a	ectopic posterior eyes (40%; 40/100)	regeneration phenotype described in Kobayashi, 2007; Adell, 2009; Hill, 2015
ndk	n/a	ectopic posterior eyes (26.1%; 24/91)	phenotype described in Cebria, 2002
fz5/8-4	n/a	ectopic posterior eyes (7.2%; 6/83)
wntA; ndk	n/a	ectopic posterior eyes (86.1%; 68/79)	regeneration phenotype described in Kobayashi, 2007
fz5/8-4; ndk	n/a	ectopic posterior eyes (74.1%; 60/81)
fz5/8-4; wntA	n/a	ectopic posterior eyes (100%; 28/28)
fz5/8-4; ndk; unc22	n/a	ectopic posterior eyes (33%; 10/30)
fz5/8-4; ndk; ndl-1	n/a	ectopic posterior eyes (29%; 7/24)
fz5/8-4; ndk; ndl-2	n/a	ectopic posterior eyes (64%; 16/25)
fz5/8-4; ndk; ndl-3	n/a	ectopic posterior eyes (54%; 13/24)
fz5/8-4; ndk; ndl-5	n/a	ectopic posterior eyes (58%; 14/24)
fz5/8-4; ndk; ndl-4	n/a	ectopic posterior eyes (90%; 27/30)
fz5/8-4; ndk; wntA	n/a	ectopic posterior eyes (100%; 9/9)
fz5/8-4; ndk; notum	n/a	ectopic posterior eyes (30%; 3/10)
ndl-3	n/a	ectopic posterior mouth (5%; 4/82)
wntP-2	n/a	ectopic posterior mouth (14%; 11/80)
ndl-3; wntP-2	n/a	ectopic posterior mouth (29%; 22/76)
sFRP2	n/a	none
sFRP2; ndl-3	n/a	ectopic posterior mouth (2%; 1/44)
SFRP2; wntP-2	n/a	ectopic posterior mouth (1%; 1/85)
sFRP2; wntP-2; ndl-3	n/a	ectopic posterior mouth (31%; 15/49)

## Sheet: Supplementary 1H
Supplementary File 1H. qRT-PCR primers
Outer primers used for reverse transcription and pre-amplification produce a product between 200-240 bp. Inner primers produce a product between 100-120 bp.
Gene	5' Outer Primer	3' Outer Primer	5' Inner Primer	3' Inner Primer	Efficiency*	Reference
fz5/8-4	ACATTTACGATAACAAGCCTCAGTT	AACAACCAGACAGAAATACGATCG	CCGGTGGAGTAGCGAATTGT	GCAACAAAGCACAGCCCATA	0.948735	NA
ndk	GGGTCAAACCGAAGTCTCAGT	CGGAGTTTTCACAGCACACAA	AGCCCGTCACGAGTGAAGAC	CTCTTGAGATGAATCAATGACTTCGACA	1.03652	NA
ndl-1	TGTGAGCAGTAACGACAGTGA	TTGTCAAAGCAAAGAGAAGGGG	GGTAACAATAACTCAATGATTCGGCA	AGTGAGGATTATTGTGTTGAGCTAAGA	0.895066	NA
ndl-2	ACGGGAACTATCATATGCCGT	TGTTGAACCAAGCCAGTTTTGA	GCCGTCGACAAATCAGCCAT	TGTTTAAATTGATATTGAGAGATCGTTGCA	0.97318	NA
ndl-3	TCTGTCCGCTTGATGCTTCA	CAAAAGGAACGACGTAGCACA	CTCCCACAATTTATGAGTGCGGT	TCTTGGGCCAATTTTGAGTTTTGATCTA	0.946577	NA
ndl-4	GCTGGACAGTGAATGGAGTAGA	GATTGACGCCGTTGGTATATGG	TGGAGTAGATGAGAATATGCTGTCCA	TCCTTTGCATGTGTAAGTTCCTGT	1.00362	NA
ndl-5	AGCACATGAATAACGGTGGGA	ACAGCTATCGGTCCAATGGC	AAAGCTGATCTCGGCACCTA	TGGAAATTTGCTGCTTTCTTT	0.915622	NA
wntA	TCGGTGCTGCATTTACTCGT	GATTTTAAAAGATCACCGACAACTCG	CATGTTGGAAGACAAGCGGTGA	AGGTAGAGCTCGAATGCACGT	0.883673	NA
wntP-2	CGAACAATCAACAAATTTCACTCTTACA	CTTTAGGAGCATCATAAACTGTTCTGT	TGCTAAATCAACACCAGAATCAGCT	CACATCCACAATTACTATGCACCCC	0.95886	NA
clathrin	ATTTATCTGGAAAATACAATAAACCCGAAG	TGAGCTCGCTAAATCATGTCCA	TCTTCCCCAACCAATTTTCTGTTCTG	CCGAATATTTTATTTGGCTCTTCCTCCA	0.960013	van Wolfswinkel, 2014
g6pd	GGGACACAGAAGCAGCTGAA	CATTGGTGCTTCGTACAGCG	TGTCAACCTTCTCCGTGTACTCTC	GACCCGATGTCGTCCTGGAG	1.0054	van Wolfswinkel, 2014
ubiquilin	TAACTGCGGCGTTCACATCT	TCACAAATGGCTCAAATGCTCA	AAATTCGCCTGCCTGTTGGG	CCGGTGGCATTAATCCATCTGT	0.95417	van Wolfswinkel, 2014
*Efficiency of inner primers calculated from standard curve (four five-fold dilutions of total RNA from intact planarians) on same IFC chip as samples.
