# Supplementary figures and images for: Two FGFRL-Wnt circuits organize the planarian anteroposterior axis
Source: eLife journal article supplement (doi:10.7554/elife.12845), 2016-04-11

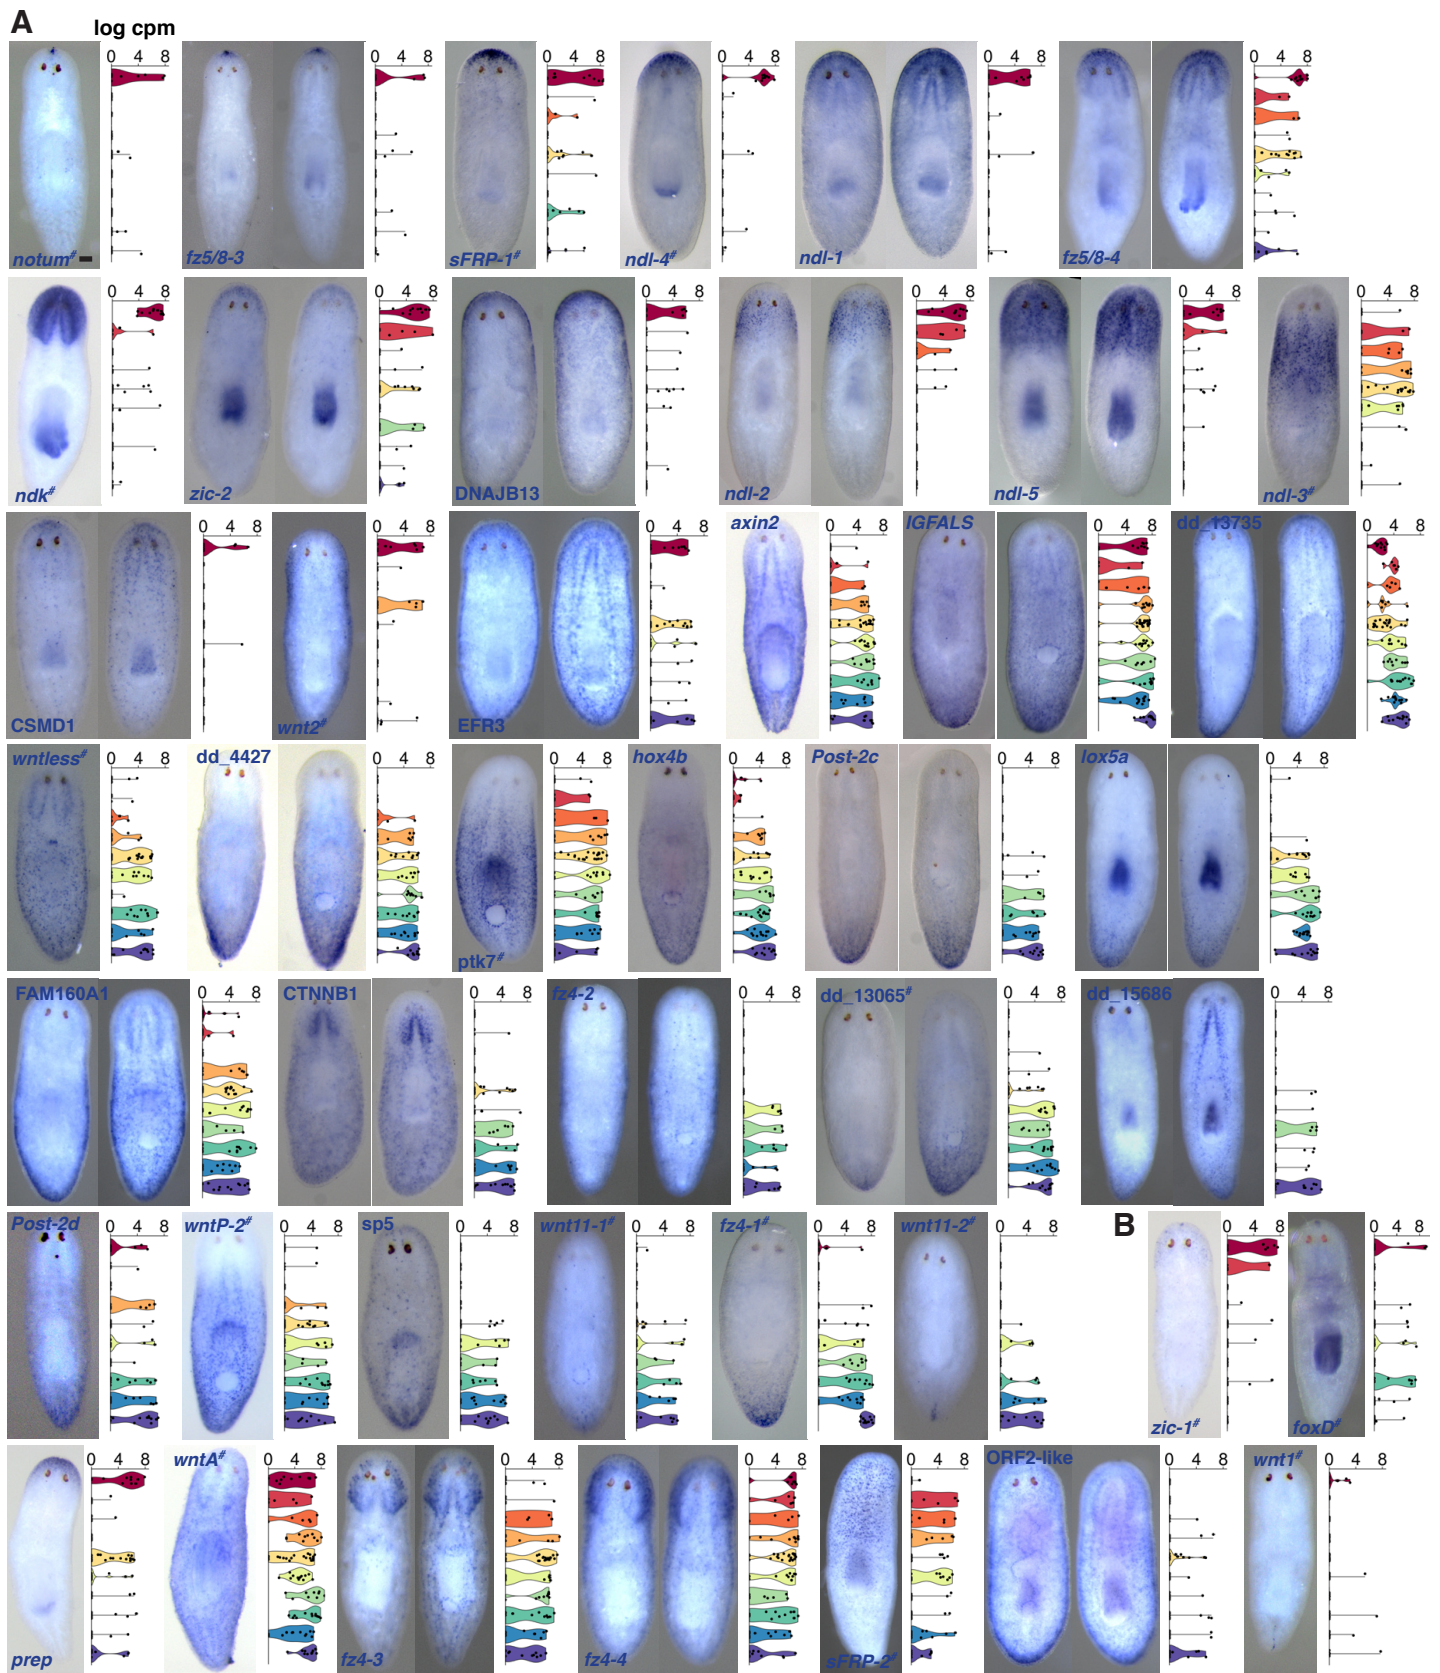

Supplement: supp [file elife-12845-supp-v1.zip › elife_poa_e12845_Figure_1_figure_supplement_2.pdf]
